# Supplementary material for: Continuous ammonia electrosynthesis using physically interlocked bipolar membrane at 1000 mA cm−2
Source: PubMed Central journal article supplement (PMC10036611; doi:10.1038/s41467-023-37273-7), 2023-03-23
Supplement: 41467_2023_37273_MOESM1_ESM.pdf [file 41467_2023_37273_MOESM1_ESM.pdf]

1 Supplementary Information for

2 **Continuous ammonia electrosynthesis using physically interlocked**

3 **bipolar membrane at 1000 mA cm<sup>-2</sup>**

4 Ziang Xu<sup>1</sup>, Lei Wan<sup>1</sup>, Yiwen Liao<sup>1</sup>, Maobin Pang<sup>1</sup>, Qin Xu<sup>1</sup>, Peican Wang<sup>1</sup> and Baoguo Wang<sup>1\*</sup>

5 <sup>1</sup>Department of Chemical Engineering, Tsinghua University, Beijing, China

6 \* Corresponding author: bgwang@tsinghua.edu.cn

7

8

9 **Supplementary information contains**

10

11 I. Supplementary Figures ..... 2

12 II. Supplementary Tables ..... 53

13 III. Supplementary Notes ..... 57

14 IV. Supplementary References ..... 76

15

16

17

18 **I. Supplementary Figures**

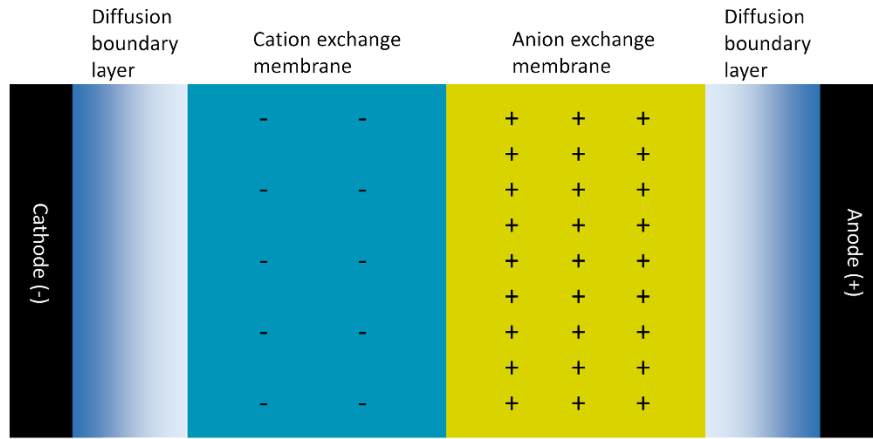

19

20 **Supplementary Fig. 1 | Schematic illustration of one-dimensional bipolar membrane model for**  
21 **numerical simulation.** Both the cation exchange layer and anion exchange layer are set to 50  $\mu\text{m}$  with a  
22 10  $\mu\text{m}$  thickness of diffusion layer. The operating mode were set in reverse bias of bipolar membranes.

23

24

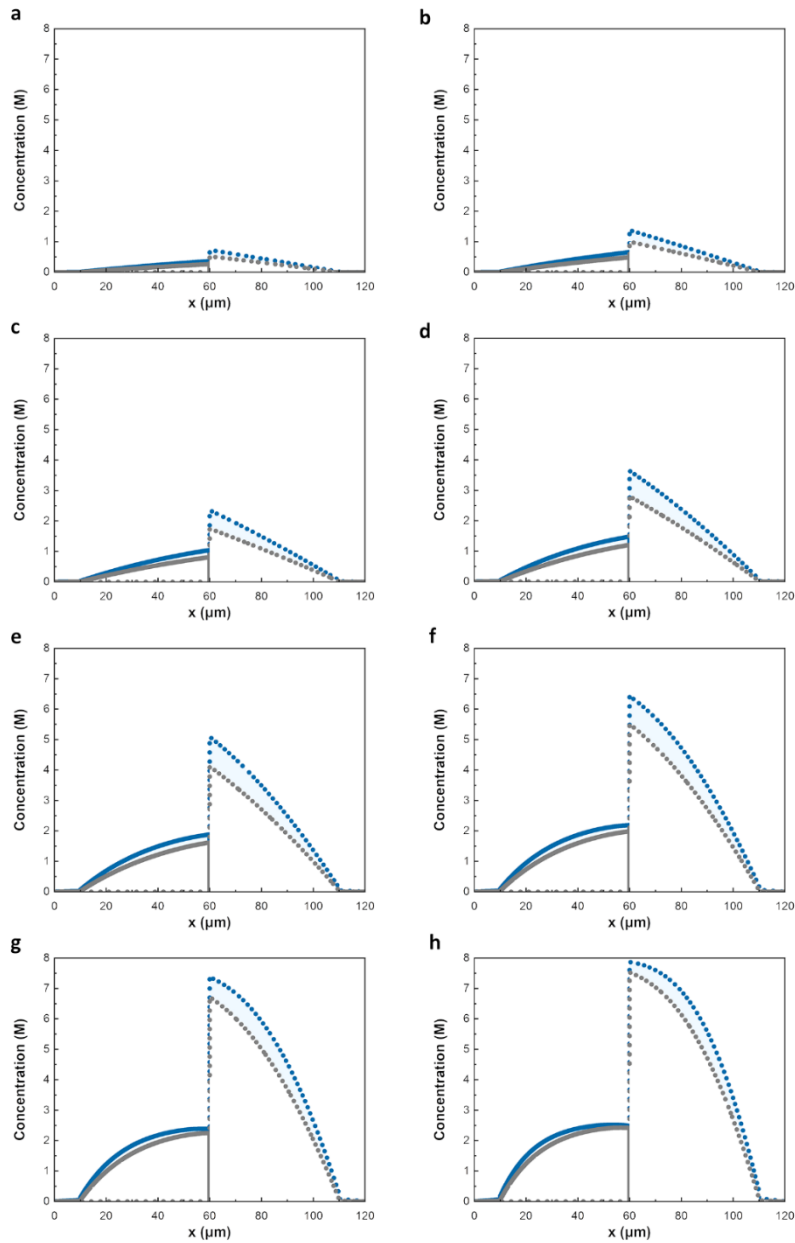

25

26 **Supplementary Fig. 2** | All-range distribution of  $H^+$  and  $OH^-$  concentration of normal bipolar membrane  
 27 (gray line) and bipolar membrane with enhanced WD rate and ionic diffusion (mazarine) based on  
 28 numerical simulation. The solid line and short dots represent for  $H^+$  and  $OH^-$ , respectively. The applied  
 29 voltage for bipolar membranes are **a**, 0.6 V; **b**, 0.7V; **c**, 0.8 V; **d**, 0.9 V; **e**, 1.0 V; **f**, 1.1 V; **g**, 1.2 V; **h**, 1.3  
 30 V.

31

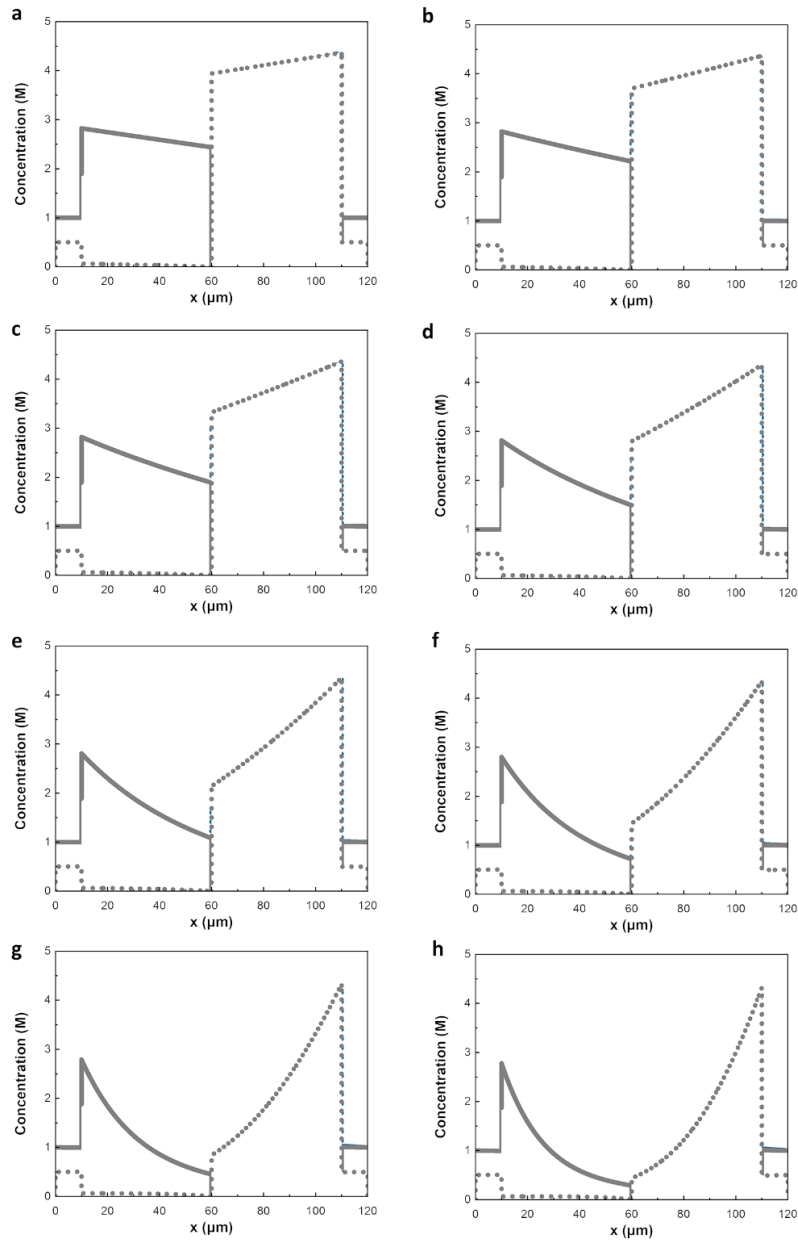

32

33 **Supplementary Fig. 3** | Distribution of  $\text{Na}^+$  and  $\text{SO}_4^-$  concentration of normal bipolar membrane (gray  
 34 line) and bipolar membrane with enhanced WD rate and ionic diffusion (mazarine) by numerical  
 35 simulation. The solid line and short dots represent for  $\text{Na}^+$  and  $\text{SO}_4^-$ , respectively. The applied voltage for  
 36 bipolar membranes are **a**, 0.6 V; **b**, 0.7V; **c**, 0.8 V; **d**, 0.9 V; **e**, 1.0 V; **f**, 1.1 V; **g**, 1.2 V; **h**, 1.3 V.

37

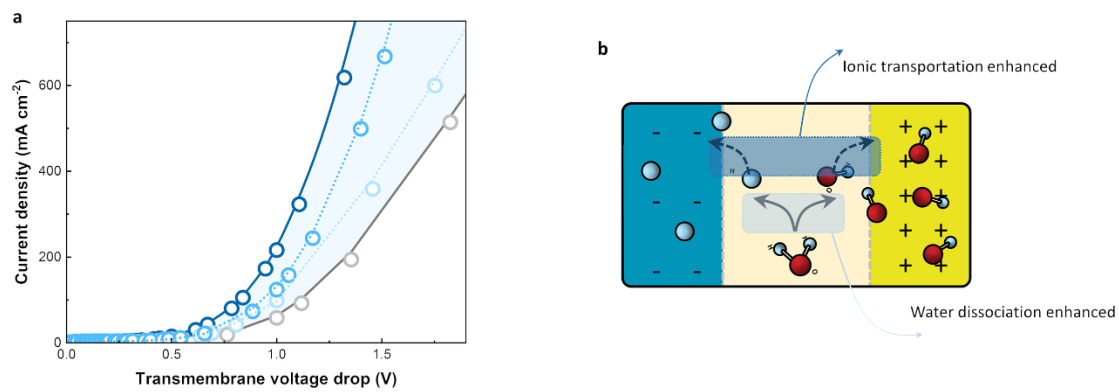

38

39 **Supplementary Fig. 4. a**, Numerical simulation results of current-voltage (I-V) curve for normal bipolar  
 40 membrane (gray scatter-line), bipolar membrane with WD rate enhanced (wathet scatter-line), bipolar  
 41 membrane with ionic diffusion enhanced (sky blue) and bipolar with both WD rate and ionic diffusion  
 42 enhanced (mazarine). **b**, schematic illustration of total interfacial kinetic promotion leading by enhancing  
 43 of WD rate and ionic transportation.

44

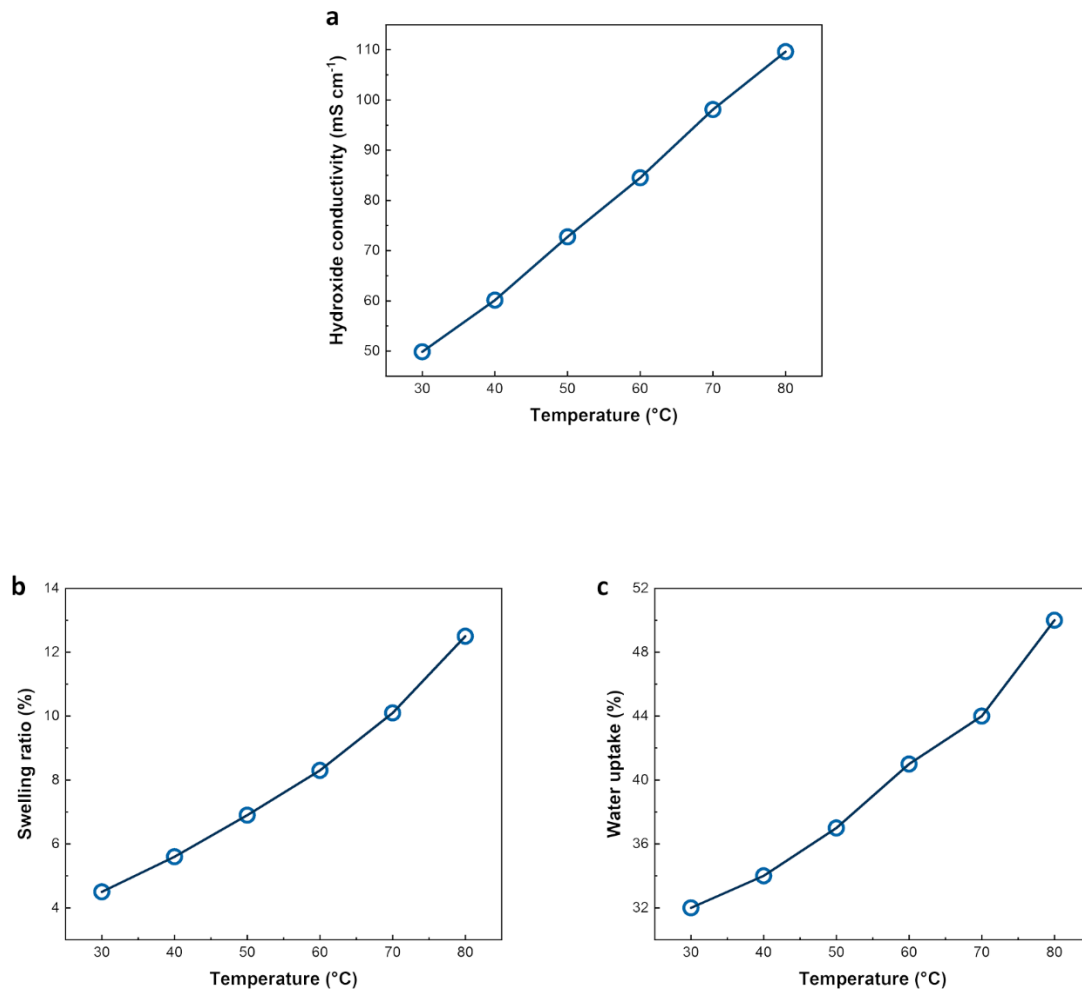

45

46 **Supplementary Fig. 5** | Basic properties of QPPT as anion exchange layer vs. temperature. **a**, hydroxide  
 47 conductivity; **b**, swelling ratio (SR); **c**, water uptake (WU).

48

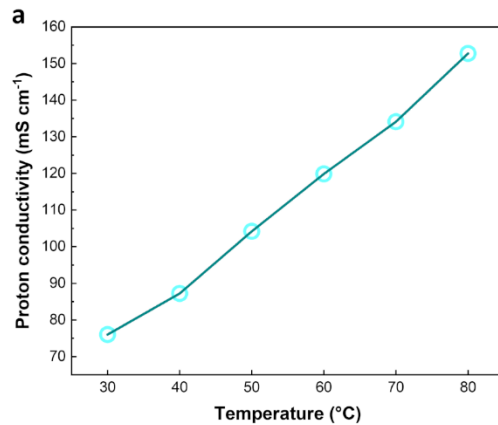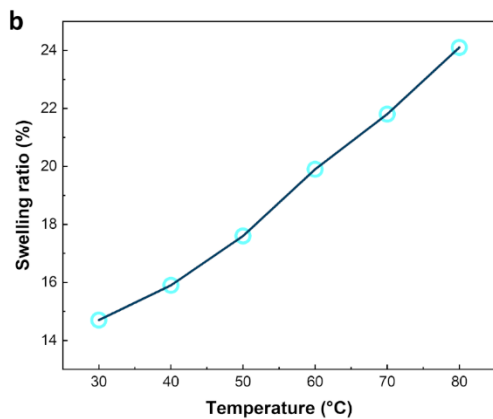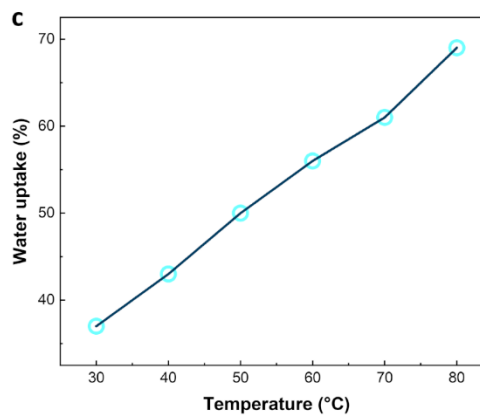

49

50 **Supplementary Fig. 6** | Basic properties of PFSA as cation exchange layer vs. temperature. **a**, proton  
51 conductivity; **b**, swelling ratio (SR); **c**, water uptake (WU).

52

53

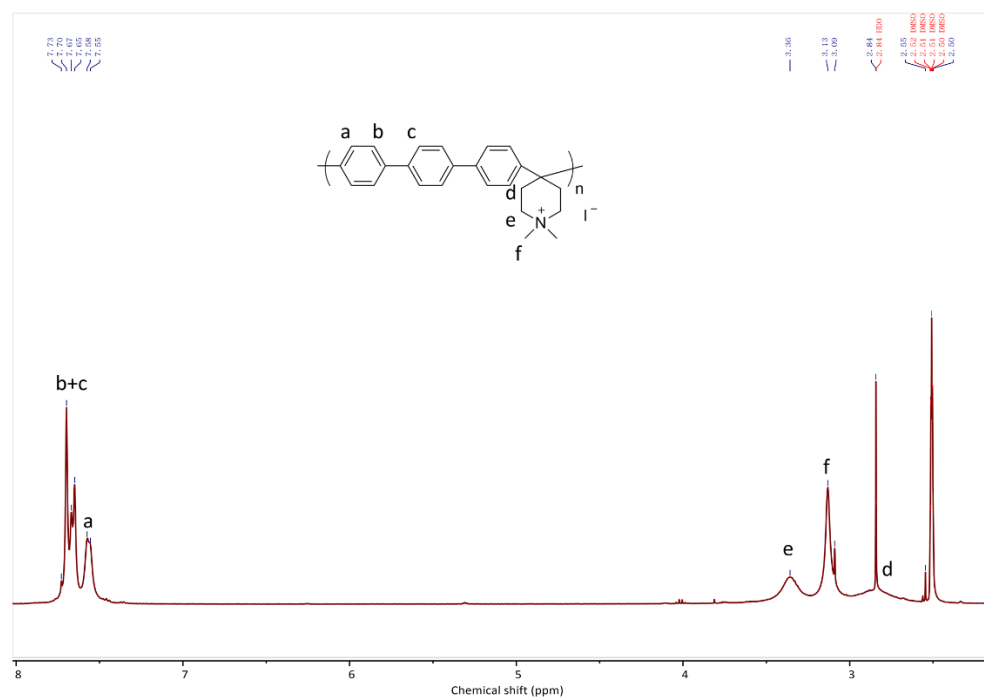

54

55 **Supplementary Fig. 7** | <sup>1</sup>H NMR spectrum of Quaternary ammonium poly (N-methyl-piperidine-co-p-  
56 terphenyl) (QPPT) as anion exchange layer

57



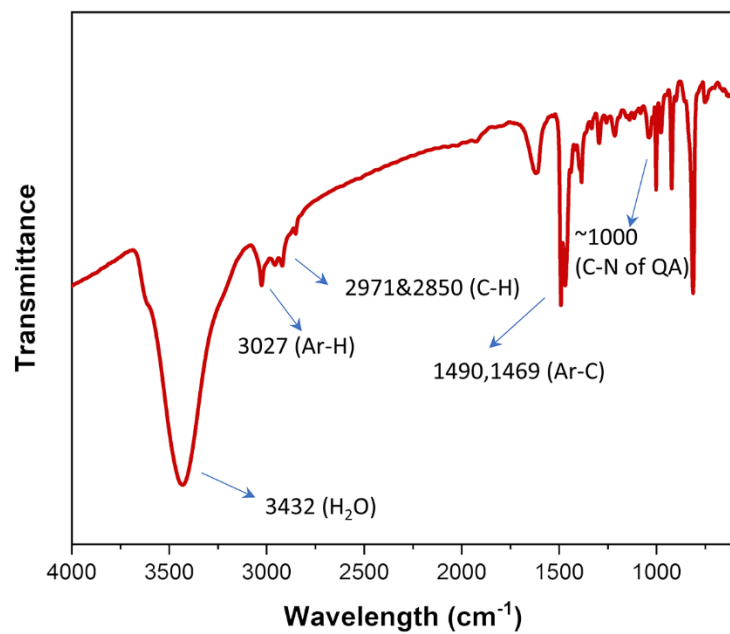

58

59 **Supplementary Fig. 8** | FTIR spectrum of QPPT powder. Strong H<sub>2</sub>O adsorption of the sample drying  
60 showed a hydrophilic nature of the polymer.

61

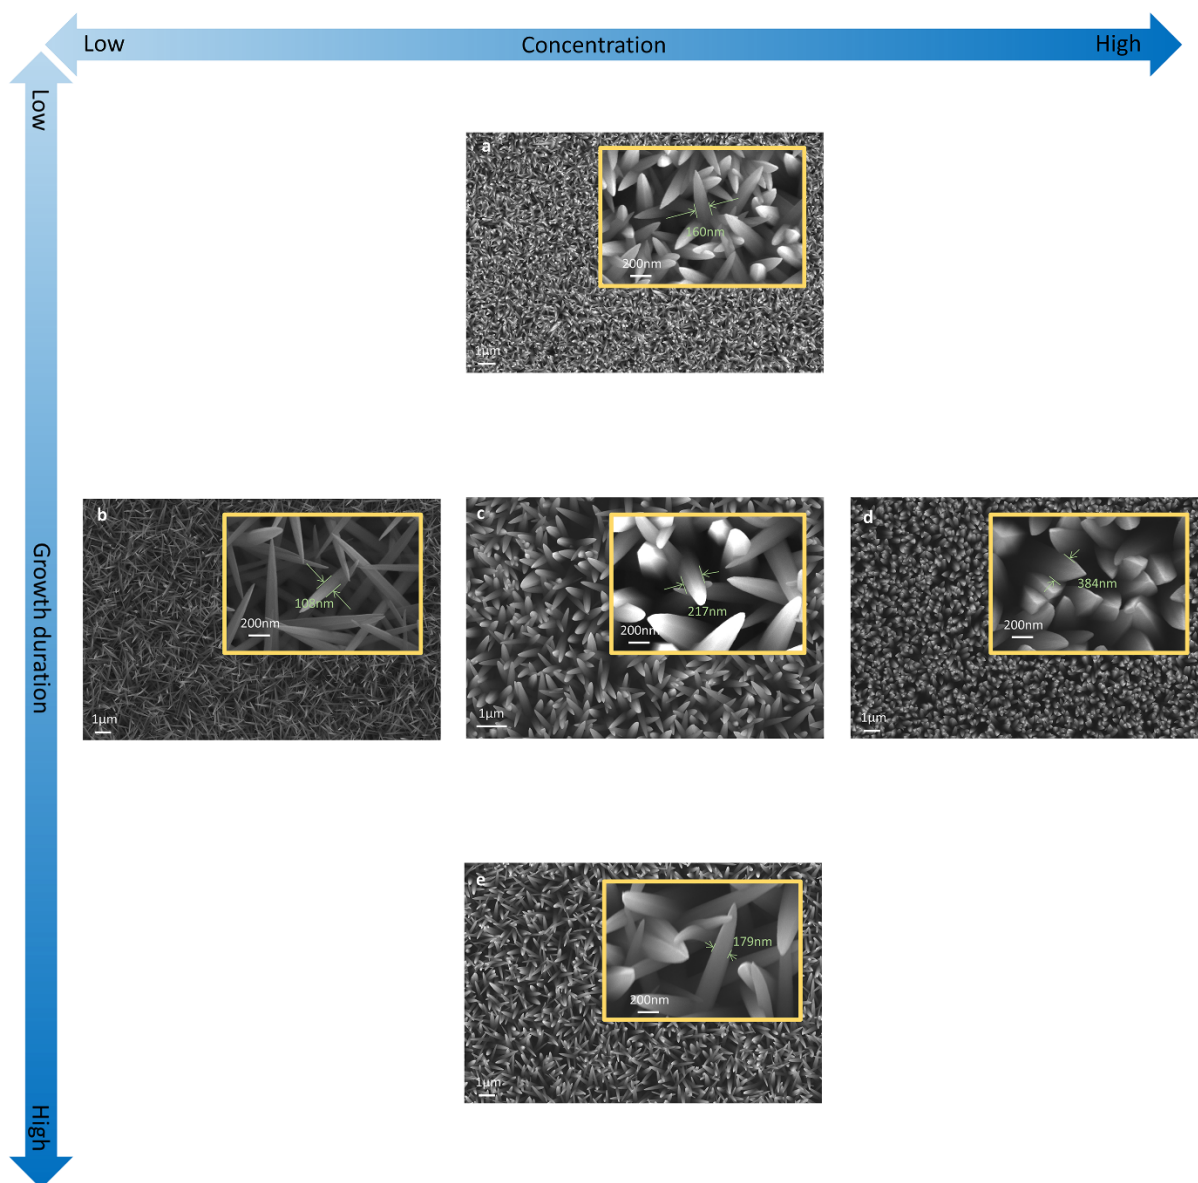

62  
 63 **Supplementary Fig. 9** | Surface SEM images of CoNi templates with different synthesis conditions. **a**,  
 64 precursor concentration: 3.2 wt%  $\text{CoCl}_2 \cdot 6\text{H}_2\text{O}$  & 1.6%  $\text{NiCl}_2 \cdot 6\text{H}_2\text{O}$ ; growth duration: 1.5 hours; **b**,  
 65 precursor concentration: 0.64 wt%  $\text{CoCl}_2 \cdot 6\text{H}_2\text{O}$  & 0.32%  $\text{NiCl}_2 \cdot 6\text{H}_2\text{O}$ ; growth duration: 3 hours; **c**,  
 66 precursor concentration: 3.2 wt%  $\text{CoCl}_2 \cdot 6\text{H}_2\text{O}$  & 1.6%  $\text{NiCl}_2 \cdot 6\text{H}_2\text{O}$ ; growth duration: 3 hours; **d**,  
 67 precursor concentration: 6.4 wt%  $\text{CoCl}_2 \cdot 6\text{H}_2\text{O}$  & 3.2%  $\text{NiCl}_2 \cdot 6\text{H}_2\text{O}$ ; growth duration: 3 hours; **e**,  
 68 precursor concentration: 3.2 wt%  $\text{CoCl}_2 \cdot 6\text{H}_2\text{O}$  & 1.6%  $\text{NiCl}_2 \cdot 6\text{H}_2\text{O}$ ; growth duration: 4.5 hours. The  
 69 insets of each figures show a magnified image.

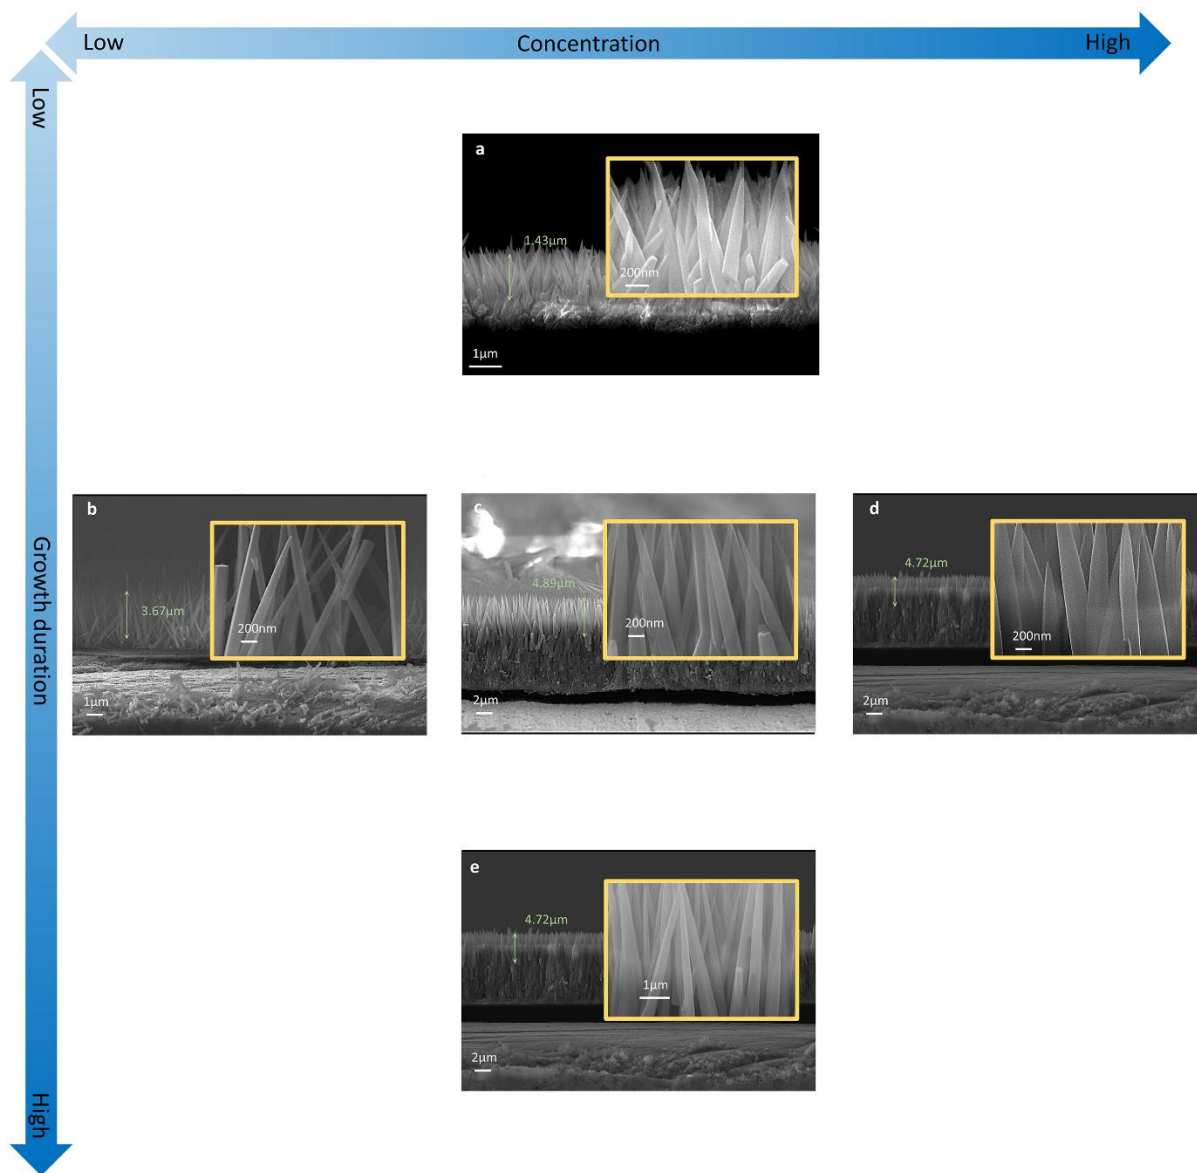

70  
 71 **Supplementary Fig. 10** | Cross-section SEM images of CoNi templates with different synthesis  
 72 conditions. **a**, precursor concentration: 3.2 wt%  $\text{CoCl}_2 \cdot 6\text{H}_2\text{O}$  & 1.6%  $\text{NiCl}_2 \cdot 6\text{H}_2\text{O}$ ; growth duration: 1.5  
 73 hours; **b**, precursor concentration: 0.64 wt%  $\text{CoCl}_2 \cdot 6\text{H}_2\text{O}$  & 0.32%  $\text{NiCl}_2 \cdot 6\text{H}_2\text{O}$ ; growth duration: 3 hours;  
 74 **c**, precursor concentration: 3.2 wt%  $\text{CoCl}_2 \cdot 6\text{H}_2\text{O}$  & 1.6%  $\text{NiCl}_2 \cdot 6\text{H}_2\text{O}$ ; growth duration: 3 hours; **d**,  
 75 precursor concentration: 6.4 wt%  $\text{CoCl}_2 \cdot 6\text{H}_2\text{O}$  & 3.2%  $\text{NiCl}_2 \cdot 6\text{H}_2\text{O}$ ; growth duration: 3 hours; **e**,  
 76 precursor concentration: 3.2 wt%  $\text{CoCl}_2 \cdot 6\text{H}_2\text{O}$  & 1.6%  $\text{NiCl}_2 \cdot 6\text{H}_2\text{O}$ ; growth duration: 4.5 hours. The  
 77 insets of each figures show a magnified image.

78

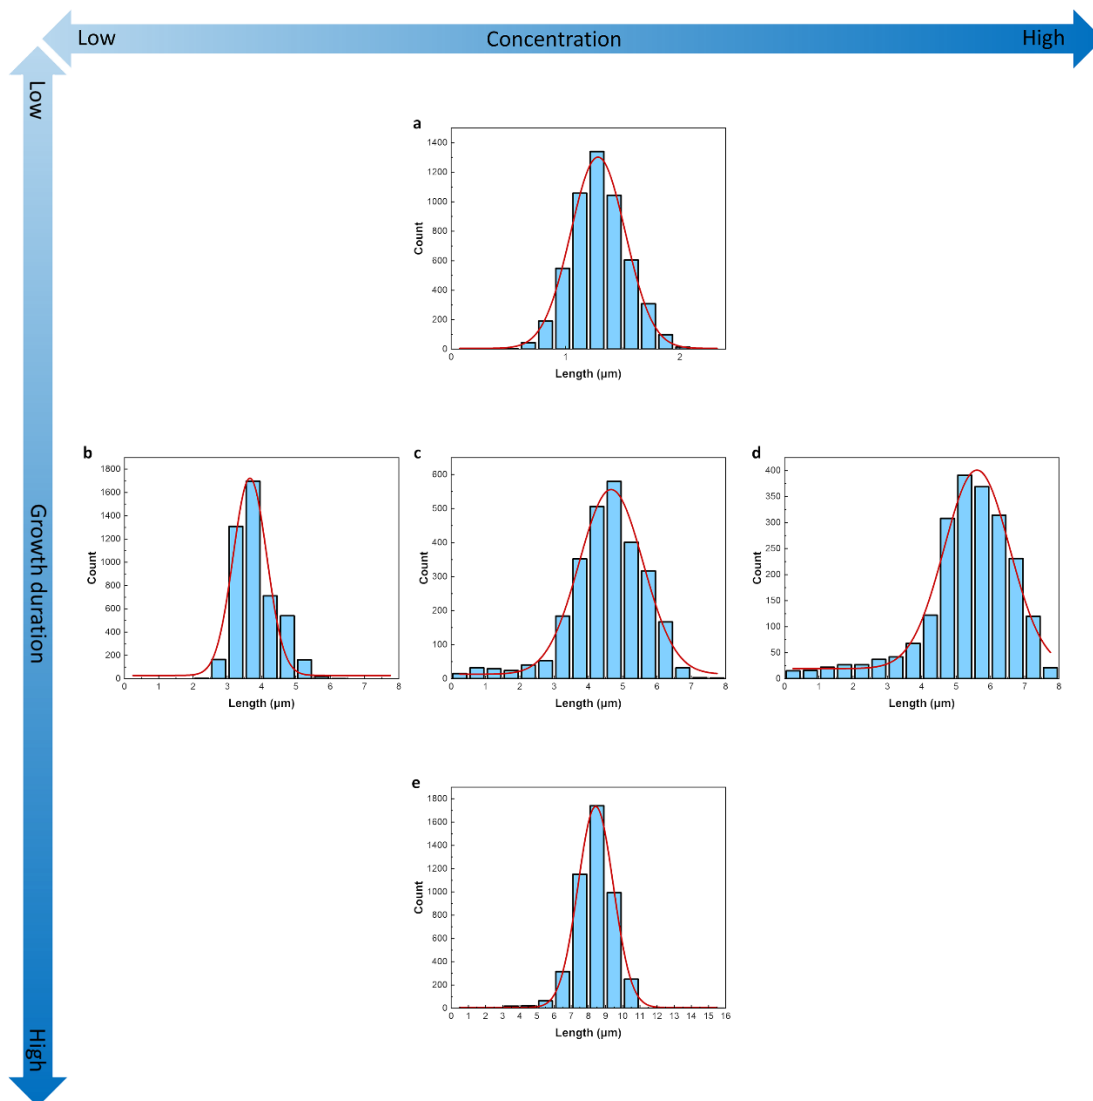

79

80 **Supplementary Fig. 11** | Height frequency of CoNi nano array grow on Ni substrate based on Gaussian  
 81 distribution. **a**, precursor concentration: 3.2 wt%  $\text{CoCl}_2 \cdot 6\text{H}_2\text{O}$  & 1.6%  $\text{NiCl}_2 \cdot 6\text{H}_2\text{O}$ ; growth duration: 1.5  
 82 hours; **b**, precursor concentration: 0.64 wt%  $\text{CoCl}_2 \cdot 6\text{H}_2\text{O}$  & 0.32%  $\text{NiCl}_2 \cdot 6\text{H}_2\text{O}$ ; growth duration: 3 hours;  
 83 **c**, precursor concentration: 3.2 wt%  $\text{CoCl}_2 \cdot 6\text{H}_2\text{O}$  & 1.6%  $\text{NiCl}_2 \cdot 6\text{H}_2\text{O}$ ; growth duration: 3 hours; **d**,  
 84 precursor concentration: 6.4 wt%  $\text{CoCl}_2 \cdot 6\text{H}_2\text{O}$  & 3.2%  $\text{NiCl}_2 \cdot 6\text{H}_2\text{O}$ ; growth duration: 3 hours; **e**,  
 85 precursor concentration: 3.2 wt%  $\text{CoCl}_2 \cdot 6\text{H}_2\text{O}$  & 1.6%  $\text{NiCl}_2 \cdot 6\text{H}_2\text{O}$ ; growth duration: 4.5 hours.

86

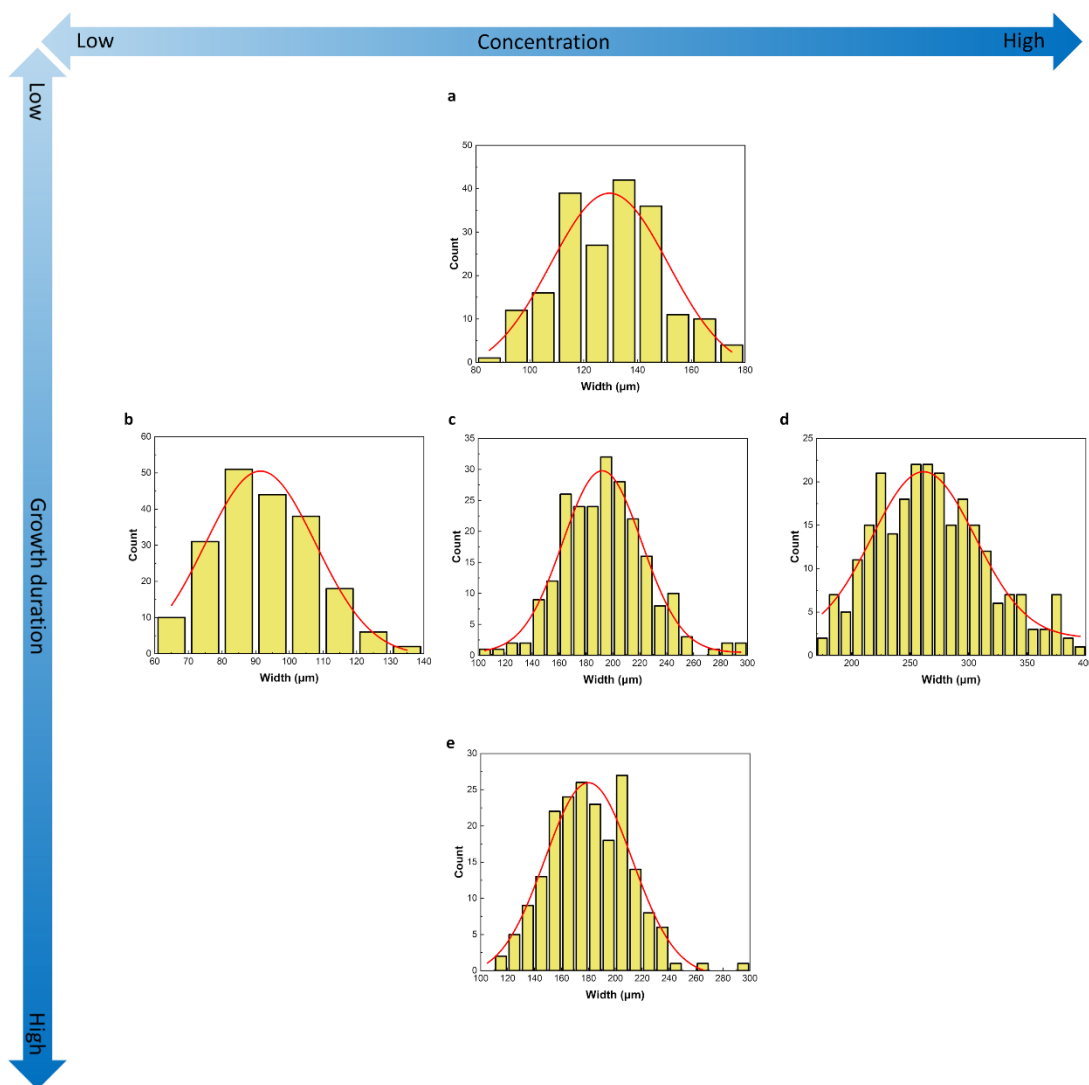

87

88 **Supplementary Fig. 12** | Width frequency of CoNi nano array grow on Ni substrate based on Gaussian  
 89 distribution. **a**, precursor concentration: 3.2 wt%  $\text{CoCl}_2 \cdot 6\text{H}_2\text{O}$  & 1.6%  $\text{NiCl}_2 \cdot 6\text{H}_2\text{O}$ ; growth duration: 1.5  
 90 hours; **b**, precursor concentration: 0.64 wt%  $\text{CoCl}_2 \cdot 6\text{H}_2\text{O}$  & 0.32%  $\text{NiCl}_2 \cdot 6\text{H}_2\text{O}$ ; growth duration: 3 hours;  
 91 **c**, precursor concentration: 3.2 wt%  $\text{CoCl}_2 \cdot 6\text{H}_2\text{O}$  & 1.6%  $\text{NiCl}_2 \cdot 6\text{H}_2\text{O}$ ; growth duration: 3 hours; **d**,  
 92 precursor concentration: 6.4 wt%  $\text{CoCl}_2 \cdot 6\text{H}_2\text{O}$  & 3.2%  $\text{NiCl}_2 \cdot 6\text{H}_2\text{O}$ ; growth duration: 3 hours; **e**,  
 93 precursor concentration: 3.2 wt%  $\text{CoCl}_2 \cdot 6\text{H}_2\text{O}$  & 1.6%  $\text{NiCl}_2 \cdot 6\text{H}_2\text{O}$ ; growth duration: 4.5 hours.

94

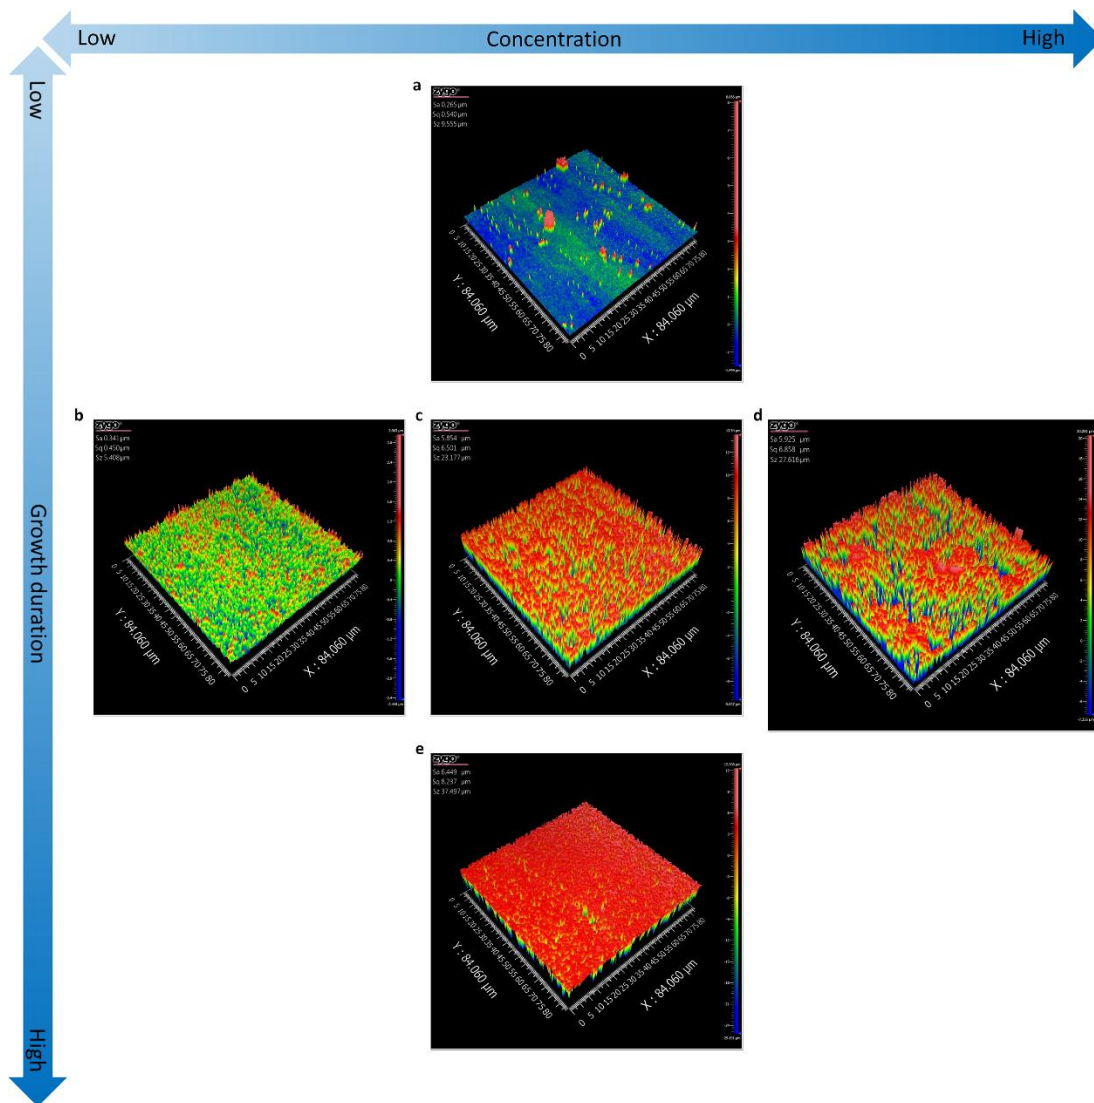

95

96 **Supplementary Fig. 13** | Surface topography of CoNi nano array grow on Ni substrate based on three-

97 dimensional white light interference method **a**, precursor concentration: 3.2 wt%  $\text{CoCl}_2 \cdot 6\text{H}_2\text{O}$  & 1.6%

98  $\text{NiCl}_2 \cdot 6\text{H}_2\text{O}$ ; growth duration: 1.5 hours; **b**, precursor concentration: 0.64 wt%  $\text{CoCl}_2 \cdot 6\text{H}_2\text{O}$  & 0.32%

99  $\text{NiCl}_2 \cdot 6\text{H}_2\text{O}$ ; growth duration: 3 hours; **c**, precursor concentration: 3.2 wt%  $\text{CoCl}_2 \cdot 6\text{H}_2\text{O}$  & 1.6%

100  $\text{NiCl}_2 \cdot 6\text{H}_2\text{O}$ ; growth duration: 3 hours; **d**, precursor concentration: 6.4 wt%  $\text{CoCl}_2 \cdot 6\text{H}_2\text{O}$  & 3.2%

101  $\text{NiCl}_2 \cdot 6\text{H}_2\text{O}$ ; growth duration: 3 hours; **e**, precursor concentration: 3.2 wt%  $\text{CoCl}_2 \cdot 6\text{H}_2\text{O}$  & 1.6%

102  $\text{NiCl}_2 \cdot 6\text{H}_2\text{O}$ ; growth duration: 4.5 hours.

103

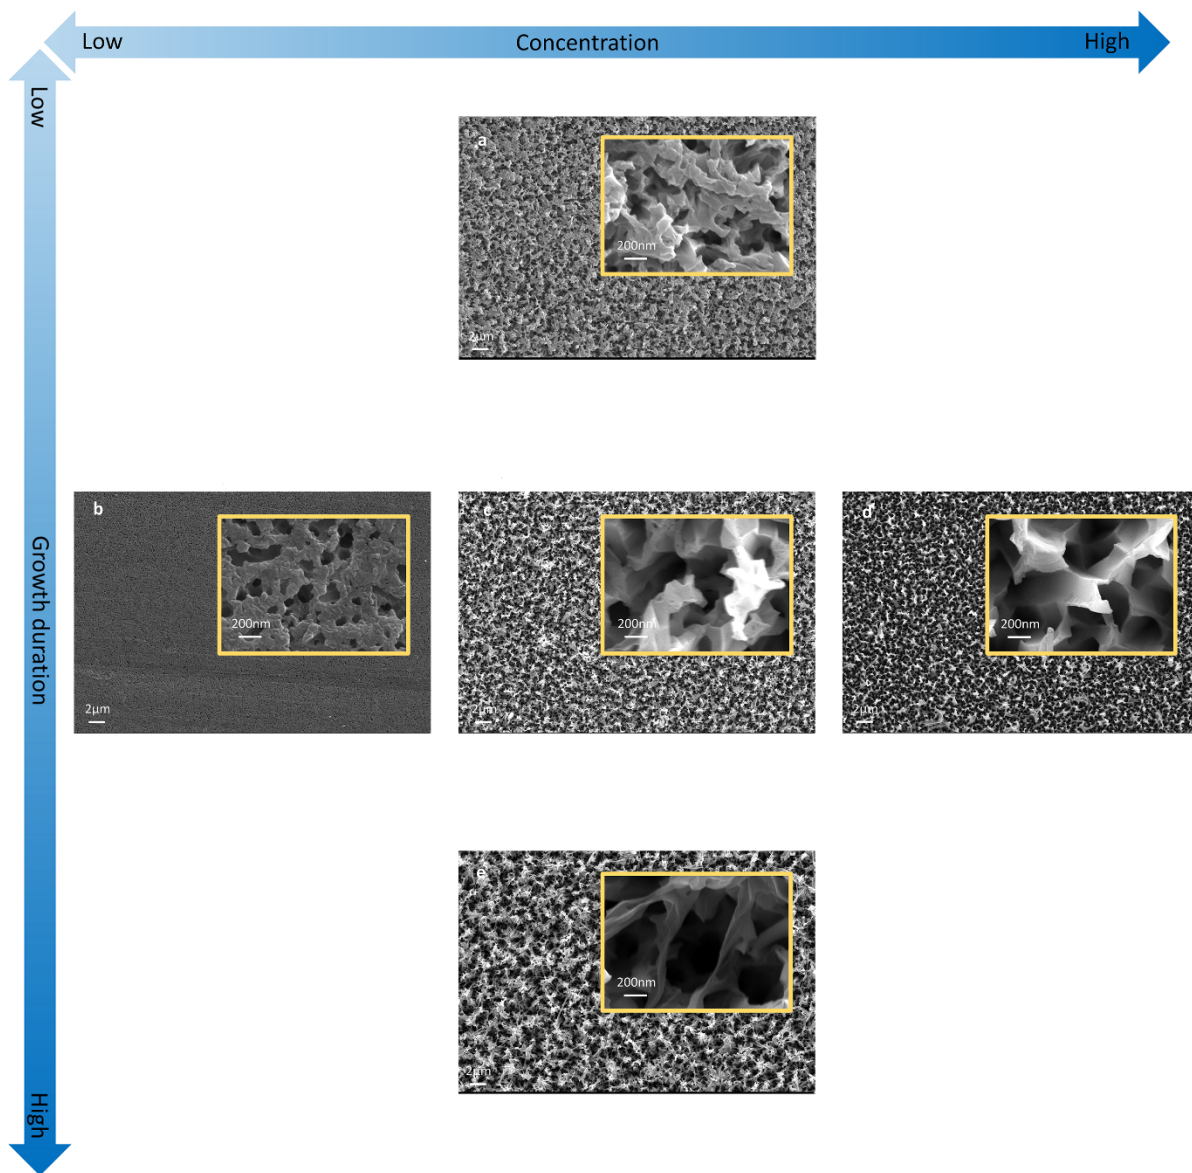

104  
 105 **Supplementary Fig. 14** | Surface SEM images of AEM transferred with different templates. **a**, precursor  
 106 concentration: 3.2 wt%  $\text{CoCl}_2 \cdot 6\text{H}_2\text{O}$  & 1.6%  $\text{NiCl}_2 \cdot 6\text{H}_2\text{O}$ ; growth duration: 1.5 hours; **b**, precursor  
 107 concentration: 0.64 wt%  $\text{CoCl}_2 \cdot 6\text{H}_2\text{O}$  & 0.32%  $\text{NiCl}_2 \cdot 6\text{H}_2\text{O}$ ; growth duration: 3 hours; **c**, precursor  
 108 concentration: 3.2 wt%  $\text{CoCl}_2 \cdot 6\text{H}_2\text{O}$  & 1.6%  $\text{NiCl}_2 \cdot 6\text{H}_2\text{O}$ ; growth duration: 3 hours; **d**, precursor  
 109 concentration: 6.4 wt%  $\text{CoCl}_2 \cdot 6\text{H}_2\text{O}$  & 3.2%  $\text{NiCl}_2 \cdot 6\text{H}_2\text{O}$ ; growth duration: 3 hours; **e**, precursor  
 110 concentration: 3.2 wt%  $\text{CoCl}_2 \cdot 6\text{H}_2\text{O}$  & 1.6%  $\text{NiCl}_2 \cdot 6\text{H}_2\text{O}$ ; growth duration: 4.5 hours. The insets of each  
 111 figures show a magnified image.

112

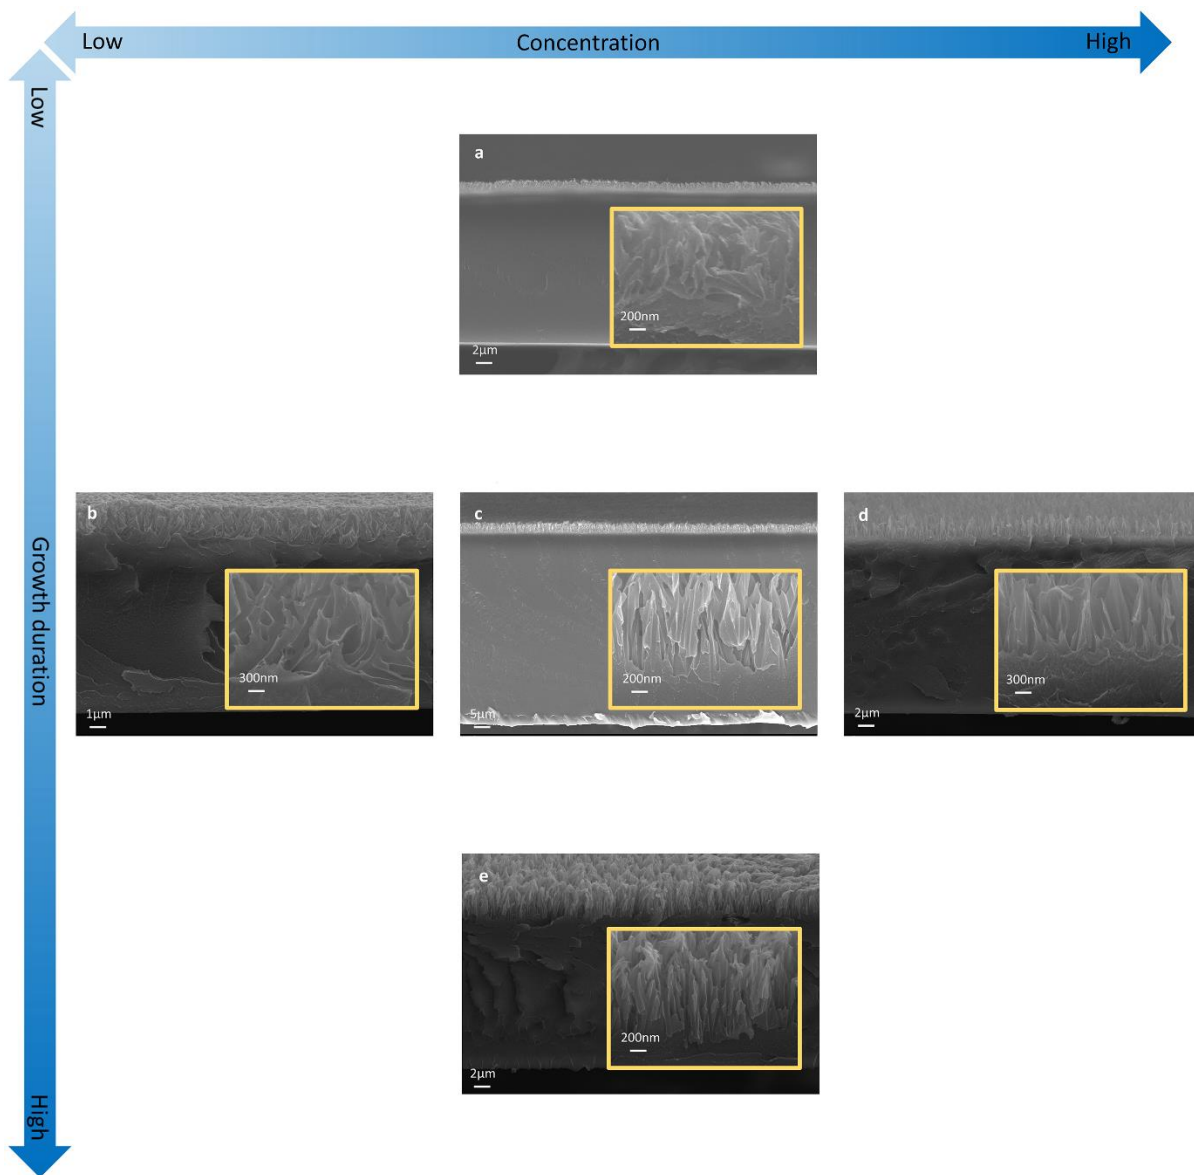

113  
 114 **Supplementary Fig. 15** | Cross-section SEM images of AEM transferred with different templates. **a**,  
 115 precursor concentration: 3.2 wt%  $\text{CoCl}_2 \cdot 6\text{H}_2\text{O}$  & 1.6%  $\text{NiCl}_2 \cdot 6\text{H}_2\text{O}$ ; growth duration: 1.5 hours; **b**,  
 116 precursor concentration: 0.64 wt%  $\text{CoCl}_2 \cdot 6\text{H}_2\text{O}$  & 0.32%  $\text{NiCl}_2 \cdot 6\text{H}_2\text{O}$ ; growth duration: 3 hours; **c**,  
 117 precursor concentration: 3.2 wt%  $\text{CoCl}_2 \cdot 6\text{H}_2\text{O}$  & 1.6%  $\text{NiCl}_2 \cdot 6\text{H}_2\text{O}$ ; growth duration: 3 hours; **d**,  
 118 precursor concentration: 6.4 wt%  $\text{CoCl}_2 \cdot 6\text{H}_2\text{O}$  & 3.2%  $\text{NiCl}_2 \cdot 6\text{H}_2\text{O}$ ; growth duration: 3 hours; **e**,  
 119 precursor concentration: 3.2 wt%  $\text{CoCl}_2 \cdot 6\text{H}_2\text{O}$  & 1.6%  $\text{NiCl}_2 \cdot 6\text{H}_2\text{O}$ ; growth duration: 4.5 hours. The  
 120 insets of each figures show a magnified image.



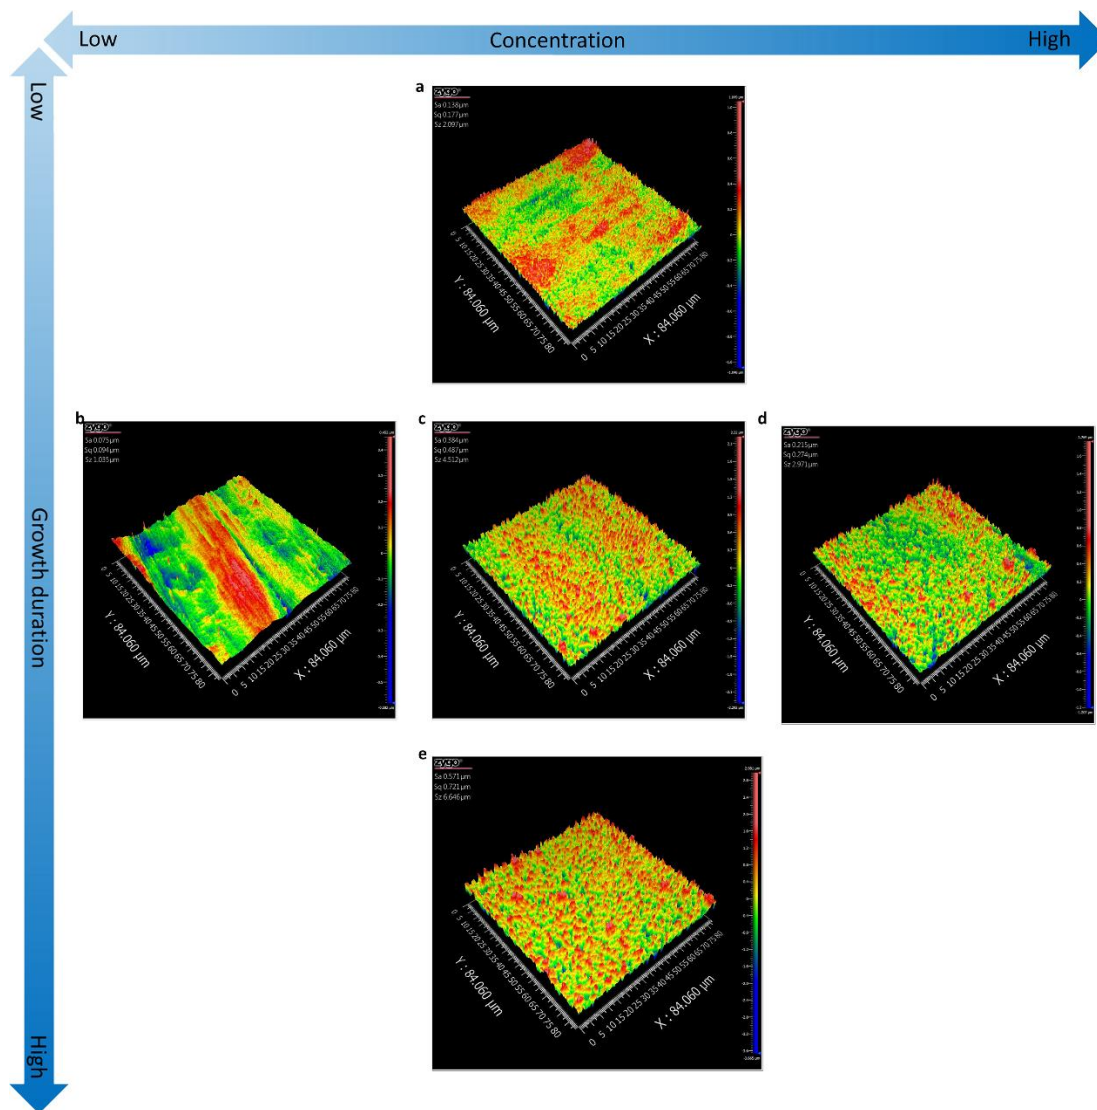

121

122

**Supplementary Fig. 16** | Surface topography of anion exchange layer by template-transferred based on

123

three-dimensional white light interference method **a**, precursor concentration: 3.2 wt%  $\text{CoCl}_2 \cdot 6\text{H}_2\text{O}$  & 1.6%

124

$\text{NiCl}_2 \cdot 6\text{H}_2\text{O}$ ; growth duration: 1.5 hours; **b**, precursor concentration: 0.64 wt%  $\text{CoCl}_2 \cdot 6\text{H}_2\text{O}$  & 0.32%

125

$\text{NiCl}_2 \cdot 6\text{H}_2\text{O}$ ; growth duration: 3 hours; **c**, precursor concentration: 3.2 wt%  $\text{CoCl}_2 \cdot 6\text{H}_2\text{O}$  & 1.6%

126

$\text{NiCl}_2 \cdot 6\text{H}_2\text{O}$ ; growth duration: 3 hours; **d**, precursor concentration: 6.4 wt%  $\text{CoCl}_2 \cdot 6\text{H}_2\text{O}$  & 3.2%

127

$\text{NiCl}_2 \cdot 6\text{H}_2\text{O}$ ; growth duration: 3 hours; **e**, precursor concentration: 3.2 wt%  $\text{CoCl}_2 \cdot 6\text{H}_2\text{O}$  & 1.6%

128

$\text{NiCl}_2 \cdot 6\text{H}_2\text{O}$ ; growth duration: 4.5 hours.

129

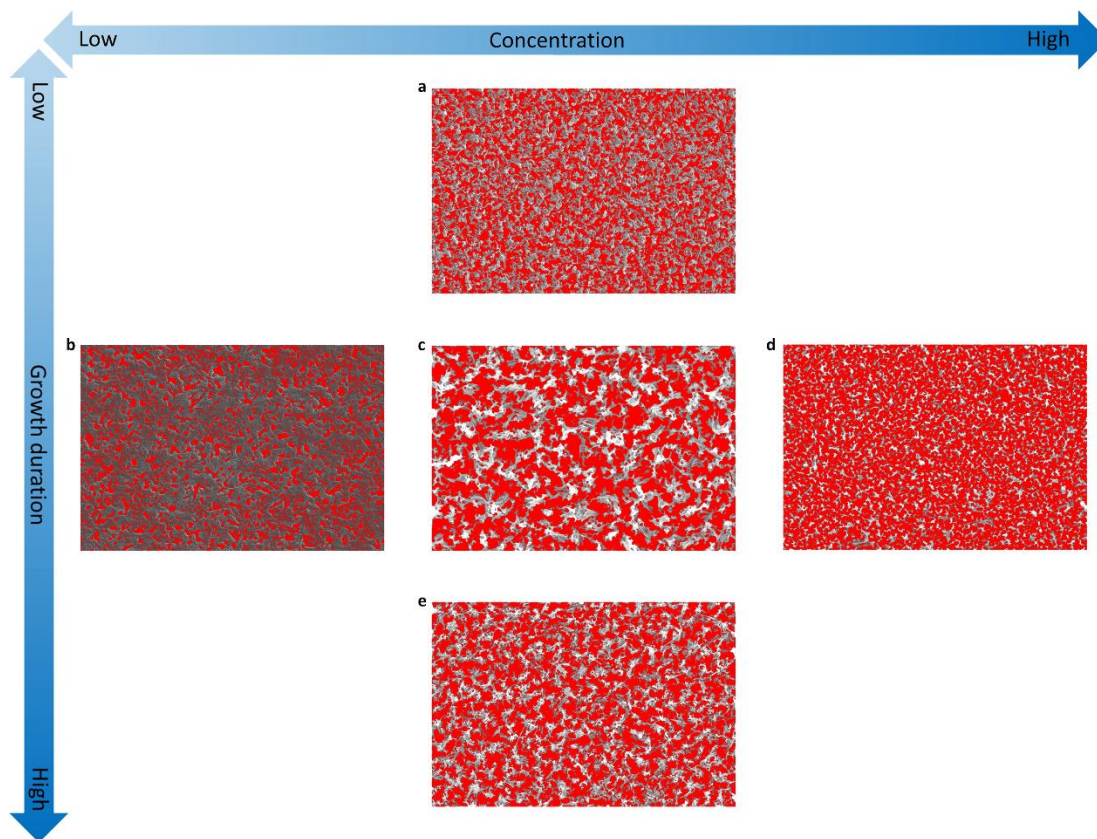

130

131 **Supplementary Fig. 17** | Surface areal porosity determination of anion exchange layer by template-  
 132 transferred by ImageJ software (gray scale identification) **a**, precursor concentration: 3.2 wt%  
 133  $\text{CoCl}_2 \cdot 6\text{H}_2\text{O}$  & 1.6%  $\text{NiCl}_2 \cdot 6\text{H}_2\text{O}$ ; growth duration: 1.5 hours; **b**, precursor concentration: 0.64 wt%  
 134  $\text{CoCl}_2 \cdot 6\text{H}_2\text{O}$  & 0.32%  $\text{NiCl}_2 \cdot 6\text{H}_2\text{O}$ ; growth duration: 3 hours; **c**, precursor concentration: 3.2 wt%  
 135  $\text{CoCl}_2 \cdot 6\text{H}_2\text{O}$  & 1.6%  $\text{NiCl}_2 \cdot 6\text{H}_2\text{O}$ ; growth duration: 3 hours; **d**, precursor concentration: 6.4 wt%  
 136  $\text{CoCl}_2 \cdot 6\text{H}_2\text{O}$  & 3.2%  $\text{NiCl}_2 \cdot 6\text{H}_2\text{O}$ ; growth duration: 3 hours; **e**, precursor concentration: 3.2 wt%  
 137  $\text{CoCl}_2 \cdot 6\text{H}_2\text{O}$  & 1.6%  $\text{NiCl}_2 \cdot 6\text{H}_2\text{O}$ ; growth duration: 4.5 hours.

138

139

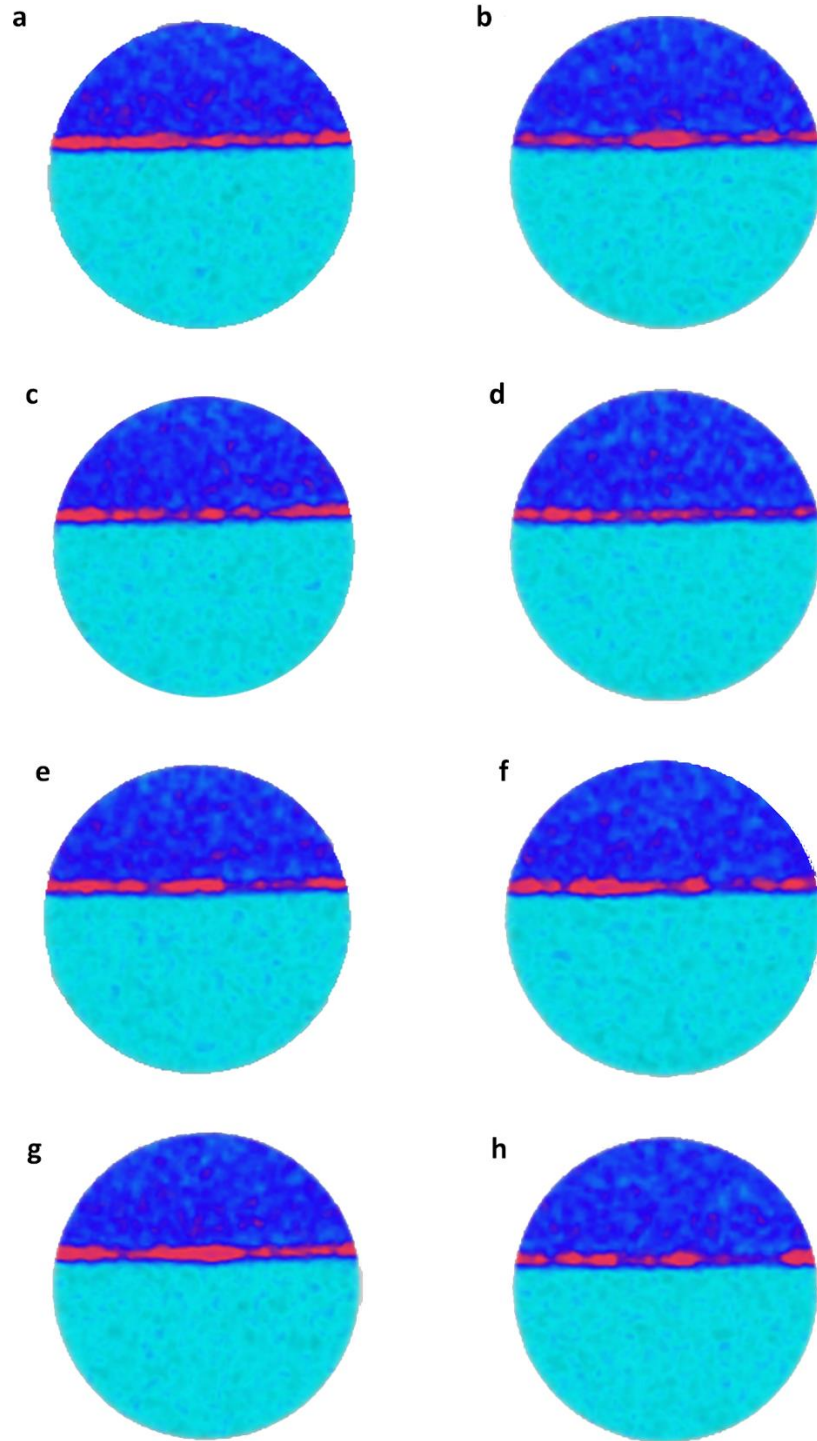

140

141 **Supplementary Fig. 18** | Snapshots of 3D reconstruction projection of MBM at various depth. **a**, 0 μm; **b**,  
142 2 μm; **c**, 4 μm; **d**, 6 μm; **e**, 8 μm; **f**, 10 μm; **g**, 12 μm; **h**, 14 μm.

143

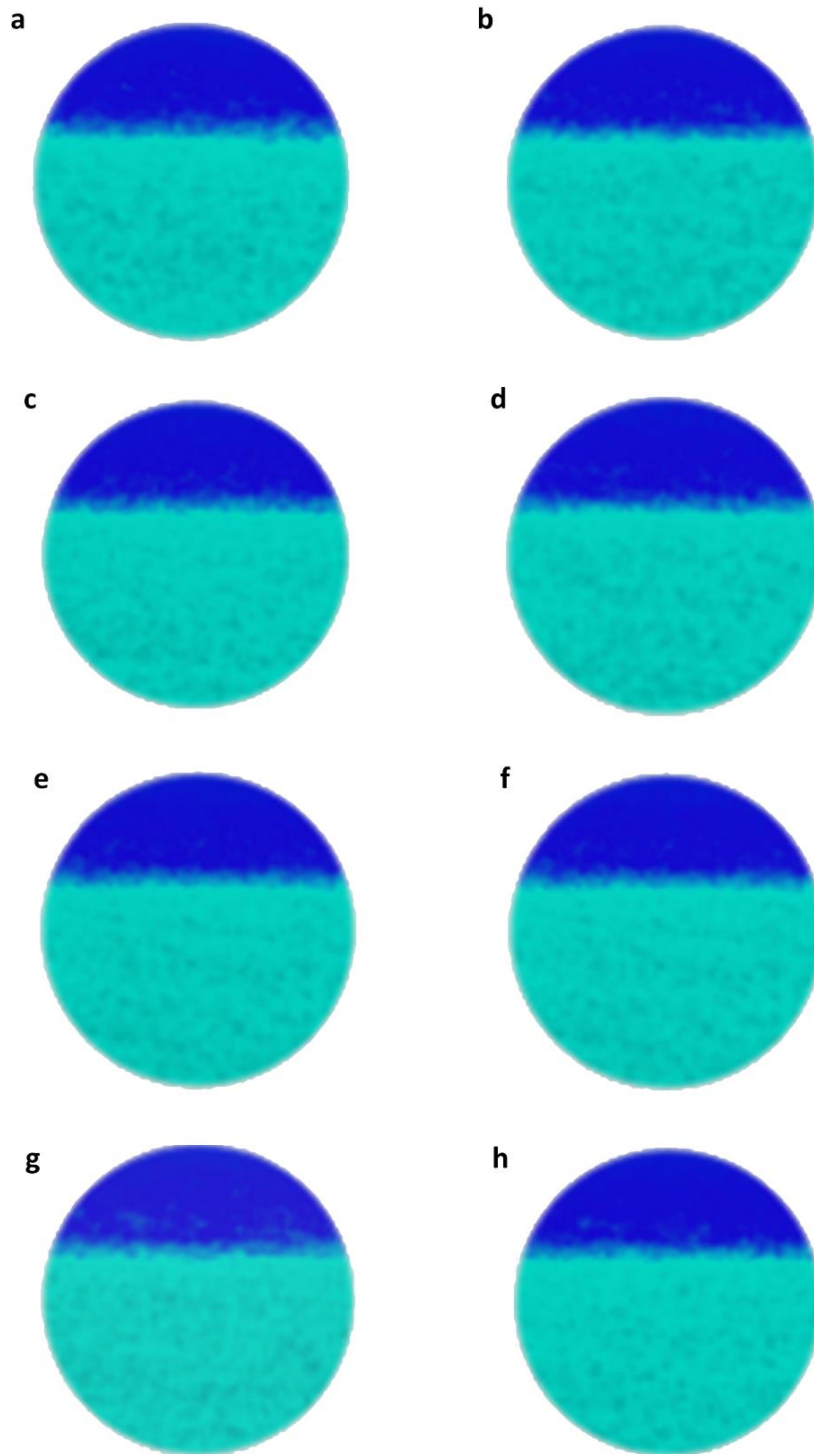

144

145 **Supplementary Fig. 19** | Snapshots of 3D reconstruction projection of FBM at various depth. **a**, 0  $\mu\text{m}$ ; **b**,  
146 2  $\mu\text{m}$ ; **c**, 4  $\mu\text{m}$ ; **d**, 6  $\mu\text{m}$ ; **e**, 8  $\mu\text{m}$ ; **f**, 10  $\mu\text{m}$ ; **g**, 12  $\mu\text{m}$ ; **h**, 14  $\mu\text{m}$ .

147

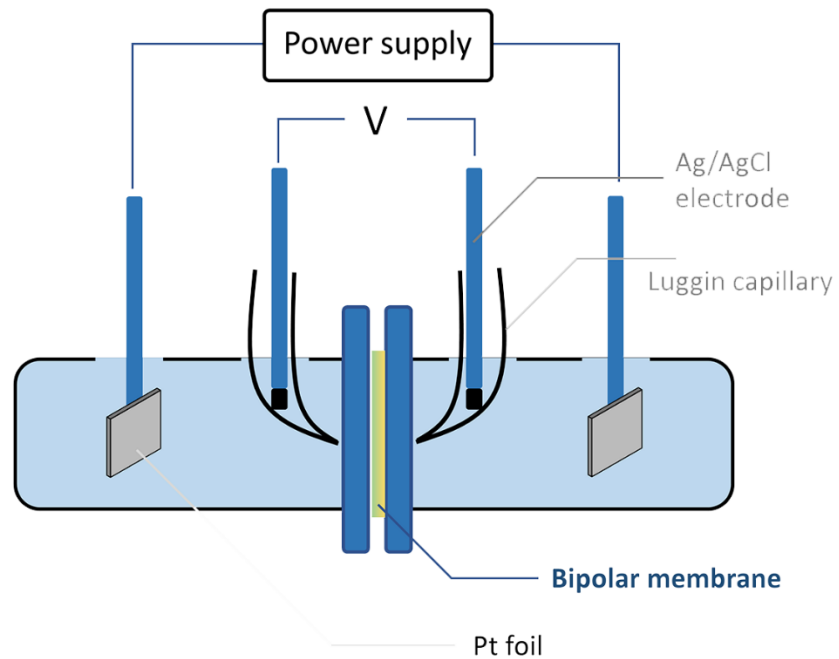

148

149 **Supplementary Fig. 20** | Schematic illustration of four-electrode measurements setup for I-V relationship,

150 long-term WD stability and EIS measurements

151

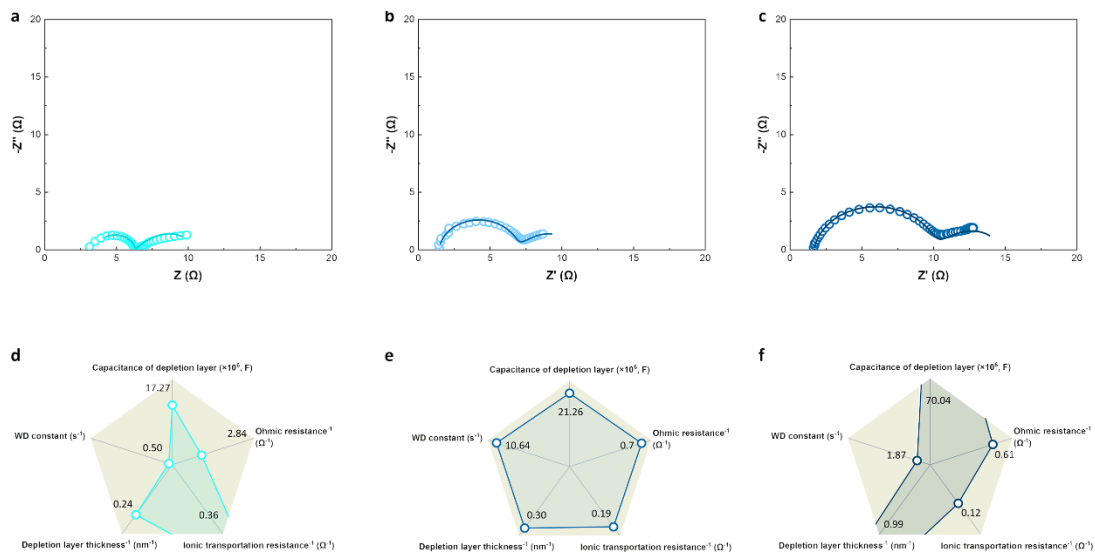

152

153 **Supplementary Fig. 21** | EIS measurements (a-c) and parameter fitting results (d-f) of MBM(s) at 5 mA

154  $\text{cm}^{-2}$ . **a, d**, precursor concentration: 3.2 wt%  $\text{CoCl}_2 \cdot 6\text{H}_2\text{O}$  & 1.6%  $\text{NiCl}_2 \cdot 6\text{H}_2\text{O}$ ; growth duration: 1.5

155 hours; **b, e**, precursor concentration: 3.2 wt%  $\text{CoCl}_2 \cdot 6\text{H}_2\text{O}$  & 1.6%  $\text{NiCl}_2 \cdot 6\text{H}_2\text{O}$ ; growth duration: 3 hours;

156 **c, f**, precursor concentration: 3.2 wt%  $\text{CoCl}_2 \cdot 6\text{H}_2\text{O}$  & 1.6%  $\text{NiCl}_2 \cdot 6\text{H}_2\text{O}$ ; growth duration: 4.5 hours.

157

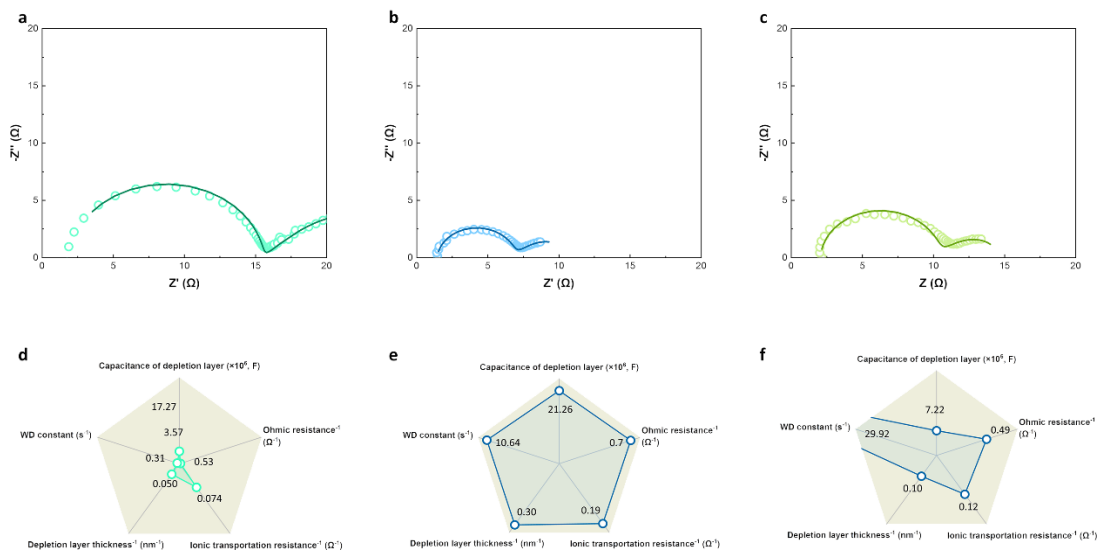

158

159 **Supplementary Fig. 22** | EIS measurements (a-c) and parameter fitting results (d-f) of MBM(s) at 5 mA  
 160  $\text{cm}^{-2}$ . **a, d**, precursor concentration: 0.64 wt%  $\text{CoCl}_2 \cdot 6\text{H}_2\text{O}$  & 0.32%  $\text{NiCl}_2 \cdot 6\text{H}_2\text{O}$ ; growth duration: 3  
 161 hours; **b, e**, precursor concentration: 3.2 wt%  $\text{CoCl}_2 \cdot 6\text{H}_2\text{O}$  & 1.6%  $\text{NiCl}_2 \cdot 6\text{H}_2\text{O}$ ; growth duration: 3 hours;  
 162 **c, f**, precursor concentration: 6.4 wt%  $\text{CoCl}_2 \cdot 6\text{H}_2\text{O}$  & 3.2%  $\text{NiCl}_2 \cdot 6\text{H}_2\text{O}$ ; growth duration: 3 hours.

163

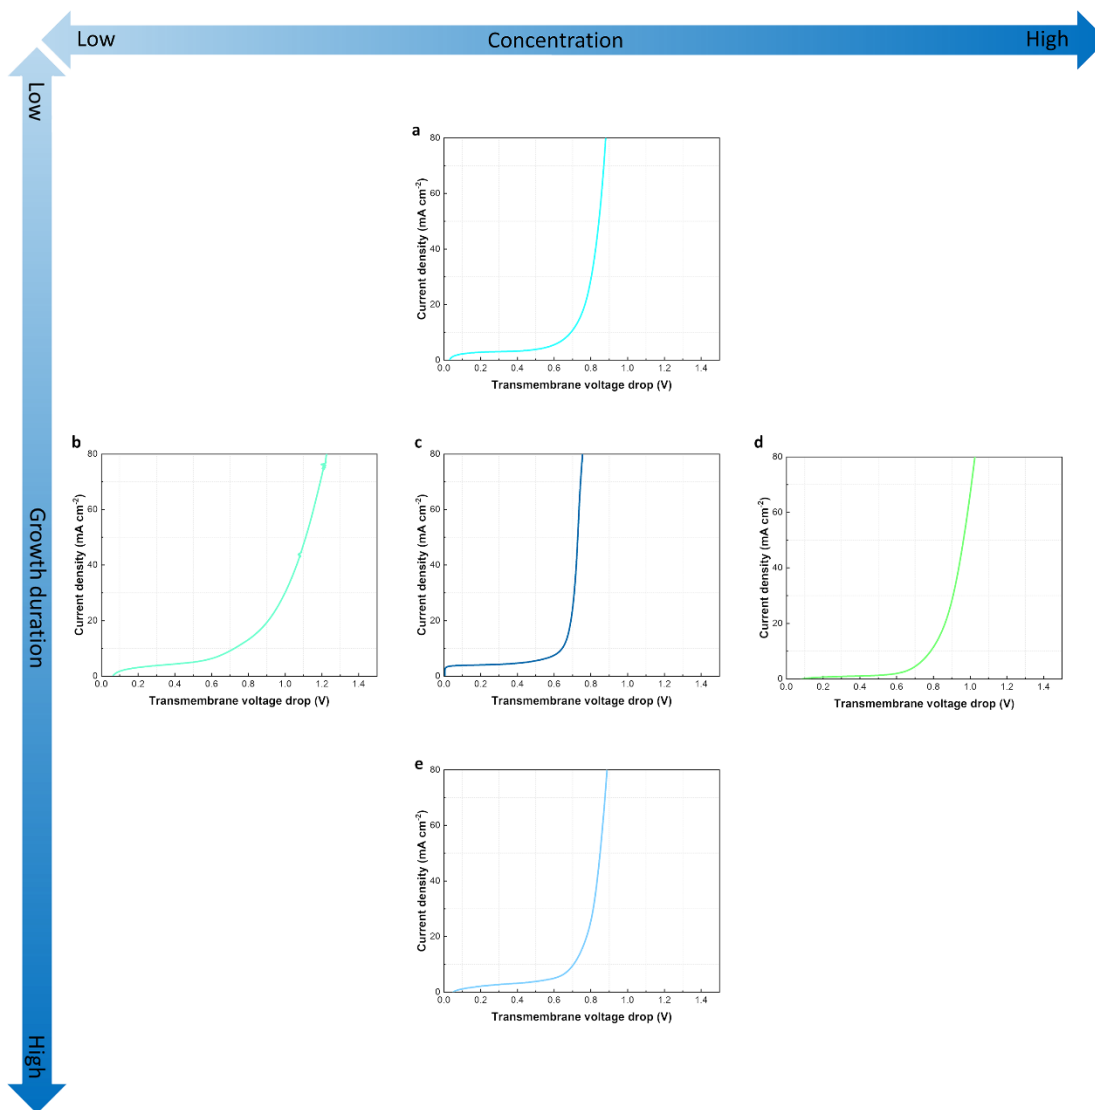

164

165 **Supplementary Fig. 23** | I-V relationships of MBM(s) at current density range from 0 to 80 mA cm<sup>-2</sup>  
 166 constructed with AEL structure transferred with templates: **a**, precursor concentration: 3.2 wt%  
 167 CoCl<sub>2</sub>·6H<sub>2</sub>O & 1.6% NiCl<sub>2</sub>·6H<sub>2</sub>O; growth duration: 1.5 hours; **b**, precursor concentration: 0.64 wt%  
 168 CoCl<sub>2</sub>·6H<sub>2</sub>O & 0.32% NiCl<sub>2</sub>·6H<sub>2</sub>O; growth duration: 3 hours; **c**, precursor concentration: 3.2 wt%  
 169 CoCl<sub>2</sub>·6H<sub>2</sub>O & 1.6% NiCl<sub>2</sub>·6H<sub>2</sub>O; growth duration: 3 hours; **d**, precursor concentration: 6.4 wt%  
 170 CoCl<sub>2</sub>·6H<sub>2</sub>O & 3.2% NiCl<sub>2</sub>·6H<sub>2</sub>O; growth duration: 3 hours; **e**, precursor concentration: 3.2 wt%  
 171 CoCl<sub>2</sub>·6H<sub>2</sub>O & 1.6% NiCl<sub>2</sub>·6H<sub>2</sub>O; growth duration: 4.5 hours.

172



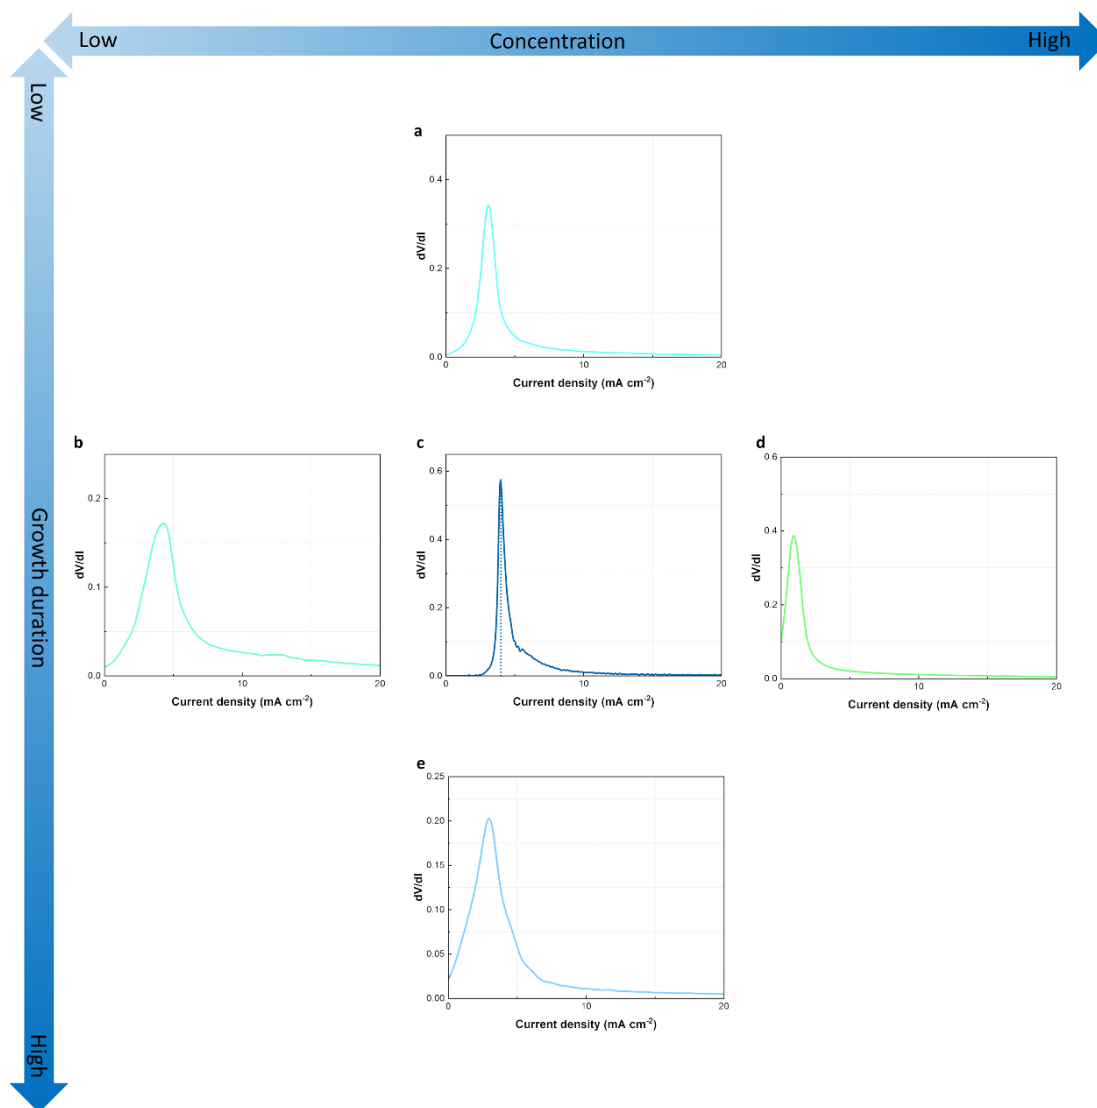

173

174 **Supplementary Fig. 24** | 1<sup>st</sup> limiting current density (derived from dV/dI vs. current density) of MBM(s)

175 constructed with AEL structure transferred with templates: **a**, precursor concentration: 3.2 wt%

176 CoCl<sub>2</sub>·6H<sub>2</sub>O & 1.6% NiCl<sub>2</sub>·6H<sub>2</sub>O; growth duration: 1.5 hours; **b**, precursor concentration: 0.64 wt%

177 CoCl<sub>2</sub>·6H<sub>2</sub>O & 0.32% NiCl<sub>2</sub>·6H<sub>2</sub>O; growth duration: 3 hours; **c**, precursor concentration: 3.2 wt%

178 CoCl<sub>2</sub>·6H<sub>2</sub>O & 1.6% NiCl<sub>2</sub>·6H<sub>2</sub>O; growth duration: 3 hours; **d**, precursor concentration: 6.4 wt%

179 CoCl<sub>2</sub>·6H<sub>2</sub>O & 3.2% NiCl<sub>2</sub>·6H<sub>2</sub>O; growth duration: 3 hours; **e**, precursor concentration: 3.2 wt%

180 CoCl<sub>2</sub>·6H<sub>2</sub>O & 1.6% NiCl<sub>2</sub>·6H<sub>2</sub>O; growth duration: 4.5 hours.

181

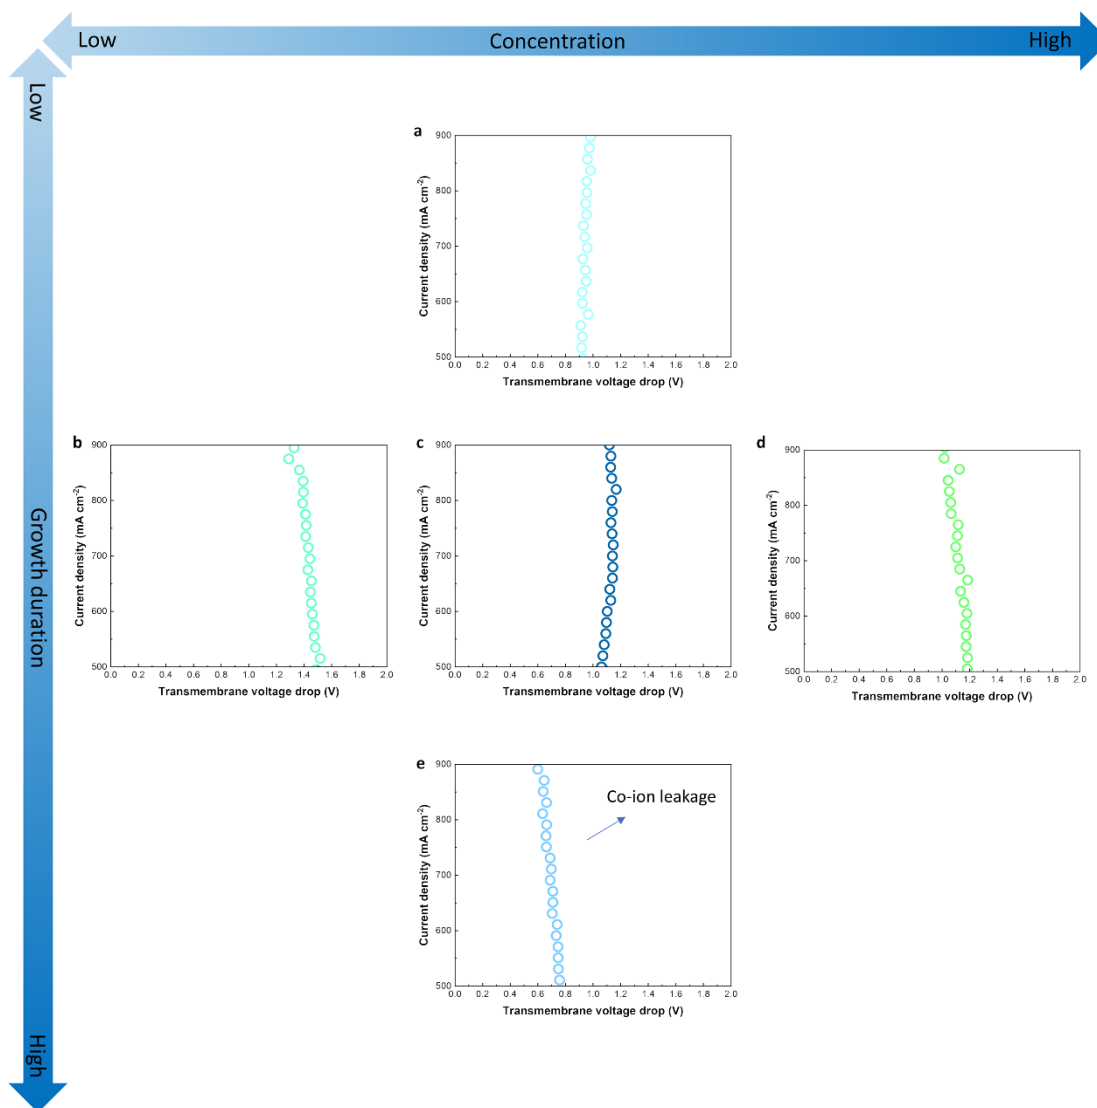

182

183 **Supplementary Fig. 25** | I-V relationships of MBM(s) at current density range from 500 mA cm<sup>-2</sup> to 900  
 184 mA cm<sup>-2</sup> constructed with AEL structure transferred with templates: **a**, precursor concentration: 3.2 wt%  
 185 CoCl<sub>2</sub>·6H<sub>2</sub>O & 1.6% NiCl<sub>2</sub>·6H<sub>2</sub>O; growth duration: 1.5 hours; **b**, precursor concentration: 0.64 wt%  
 186 CoCl<sub>2</sub>·6H<sub>2</sub>O & 0.32% NiCl<sub>2</sub>·6H<sub>2</sub>O; growth duration: 3 hours; **c**, precursor concentration: 3.2 wt%  
 187 CoCl<sub>2</sub>·6H<sub>2</sub>O & 1.6% NiCl<sub>2</sub>·6H<sub>2</sub>O; growth duration: 3 hours; **d**, precursor concentration: 6.4 wt%  
 188 CoCl<sub>2</sub>·6H<sub>2</sub>O & 3.2% NiCl<sub>2</sub>·6H<sub>2</sub>O; growth duration: 3 hours; **e**, precursor concentration: 3.2 wt%  
 189 CoCl<sub>2</sub>·6H<sub>2</sub>O & 1.6% NiCl<sub>2</sub>·6H<sub>2</sub>O; growth duration: 4.5 hours.

190

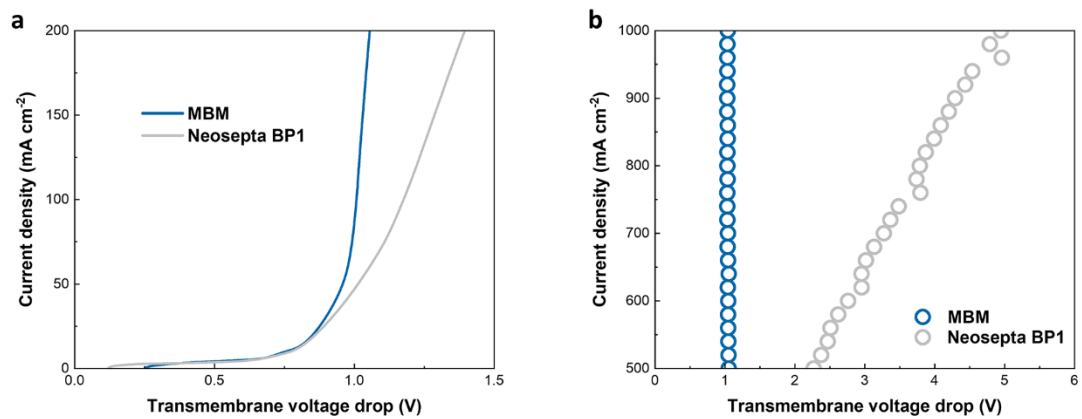

191

192 **Supplementary Fig. 26** | Water dissociation I-V curves of MBM and commercial Neosepta BP1 in  
 193 alkaline medium (1 M KOH). **a**, 0-200  $\text{mA cm}^{-2}$ ; **b**, 500-1000  $\text{mA cm}^{-2}$ .

194

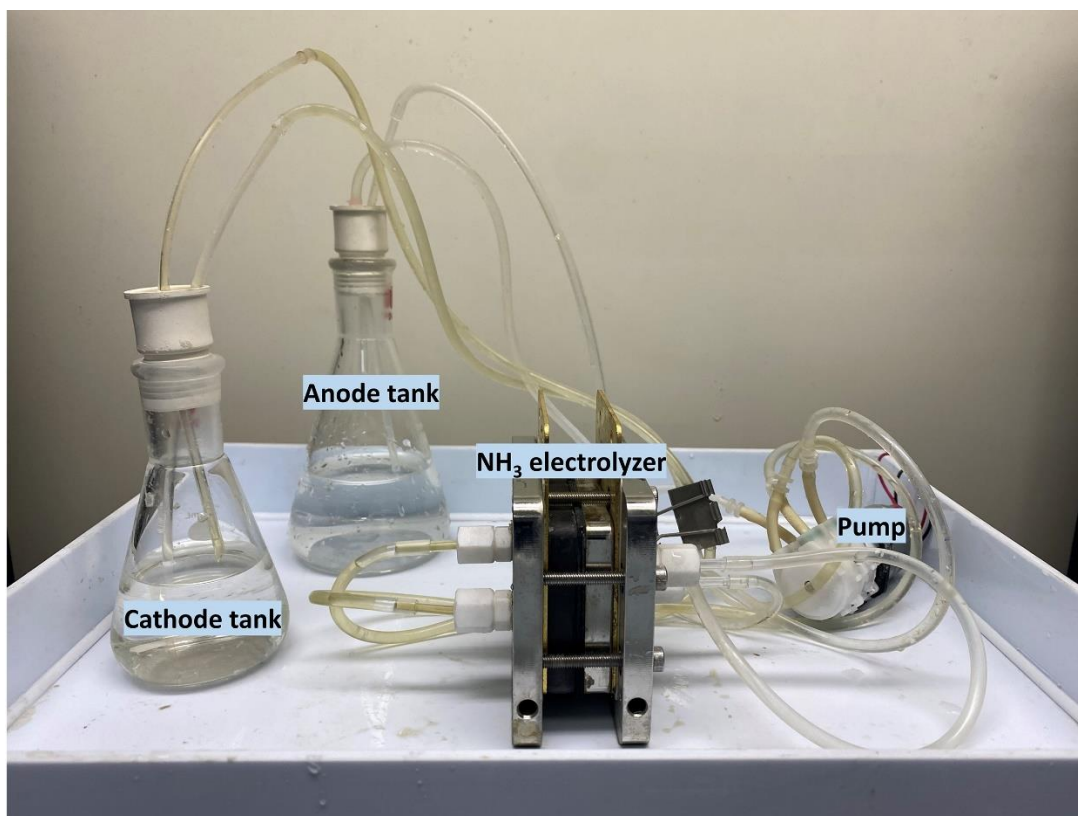

195

196 **Supplementary Fig. 27** | Photography description of continuous NH<sub>3</sub> electrosynthesis flow cell system.

197 The electrolytes were 1 M KOH/2000 ppm KNO<sub>3</sub> in cathode tank and is 1 M KOH in anode tank before  
198 startup, respectively.

199

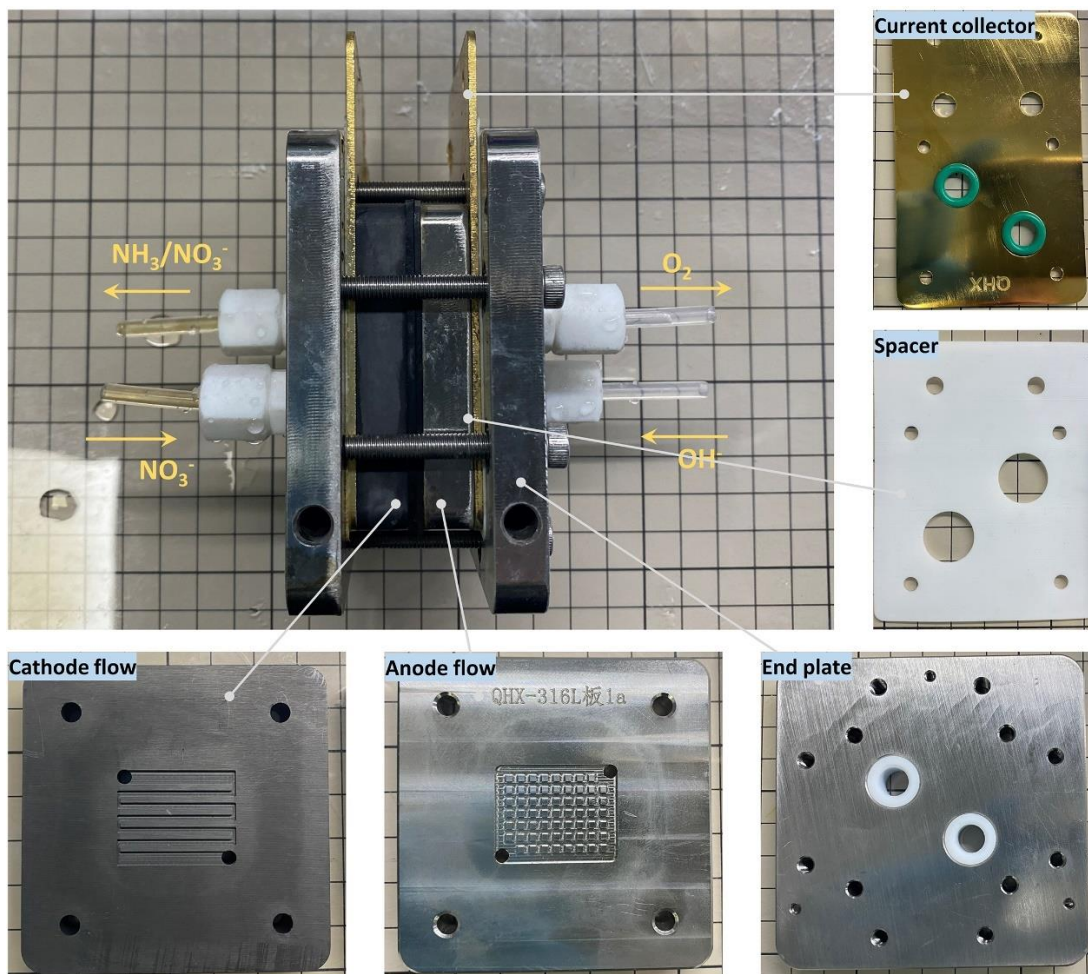

200

201 **Supplementary Fig. 28** | Photography description of continuous  $\text{NH}_3$  electrosynthesis flow cell internal  
 202 components. Several main parts are included: two current collectors (cooper plates overgild), two spacers  
 203 (Teflon); two end plates (316L steel); anode flow (316L steel) and cathode flow (graphite).

204

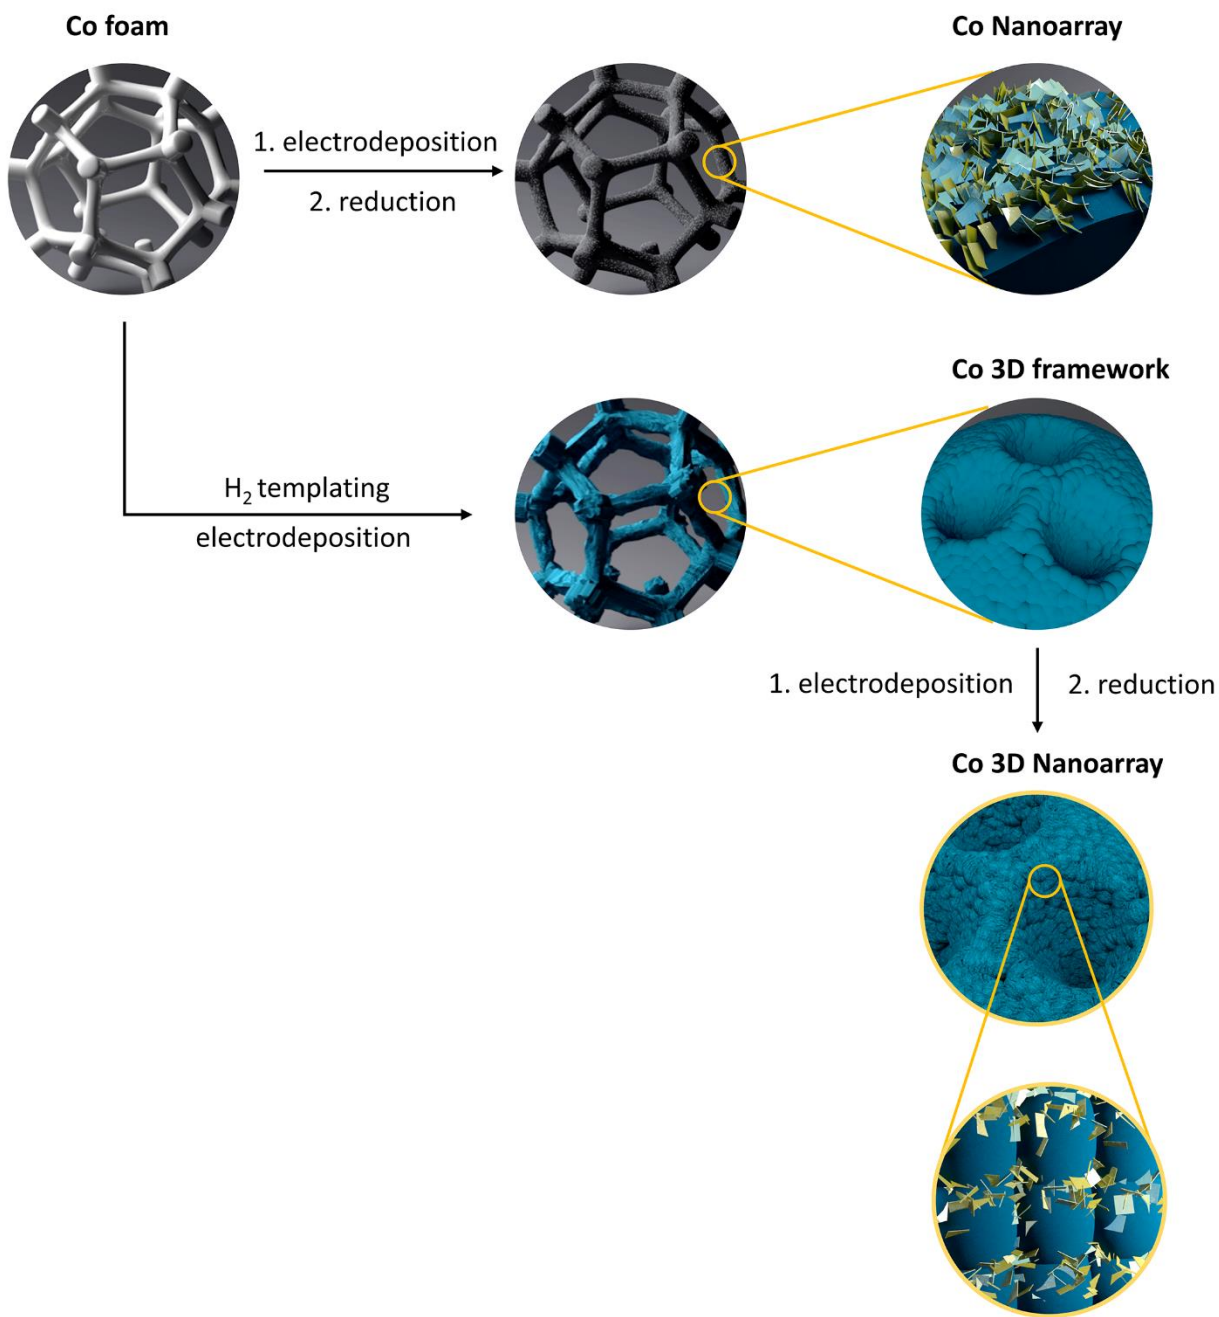

205  
 206 **Supplementary Fig. 29** | Schematic illustration of fabricating 1) Co Nanoarray, 2) Co 3D framework and  
 207 3) Co 3D Nanoarray as NO<sub>3</sub><sup>-</sup>RR catalyst.

208  
 209

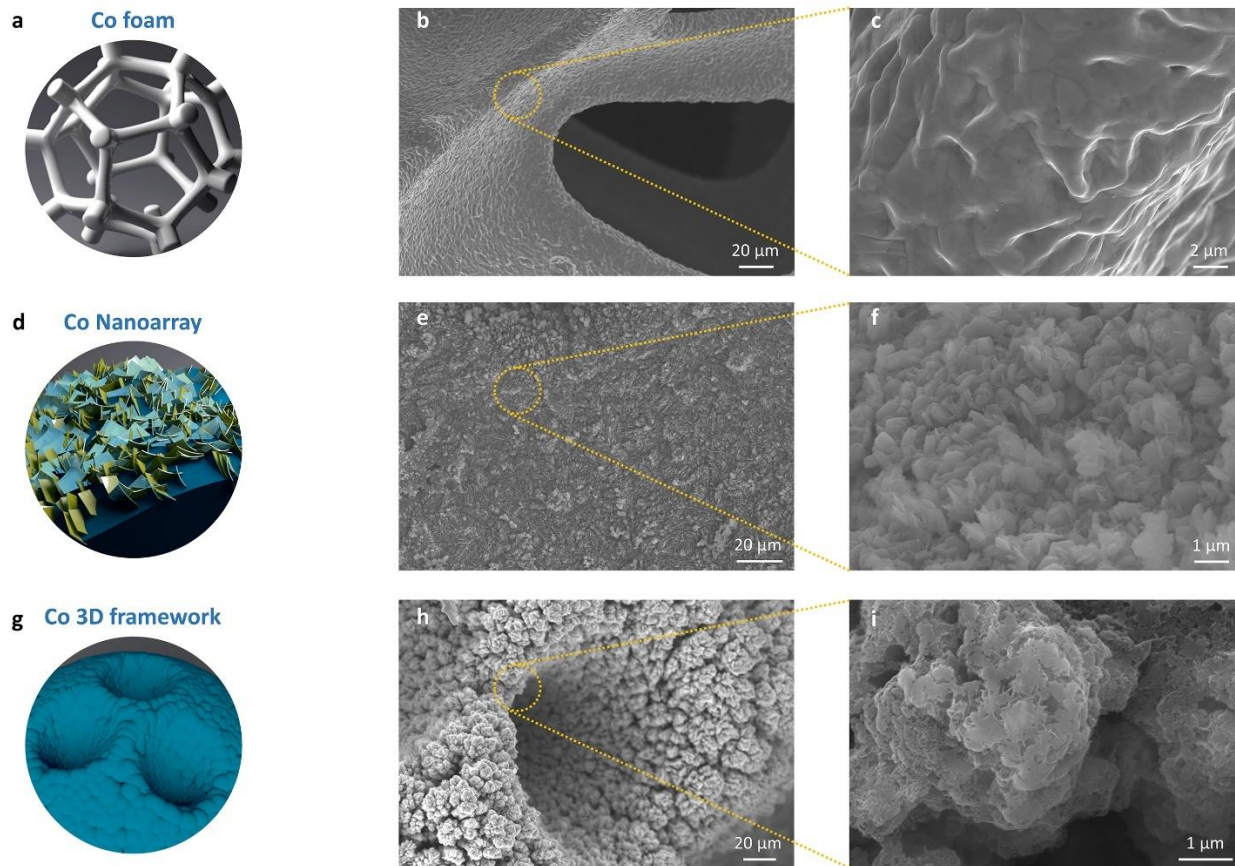

210

211 **Supplementary Fig. 30** | Microscopic SEM images of referred  $\text{NO}_3^-$ RR catalyst: **a,b,c**, Co foam; **d,e,f**,

212 Co Nanoarray; **g,h,i**, Co 3D framework.

213

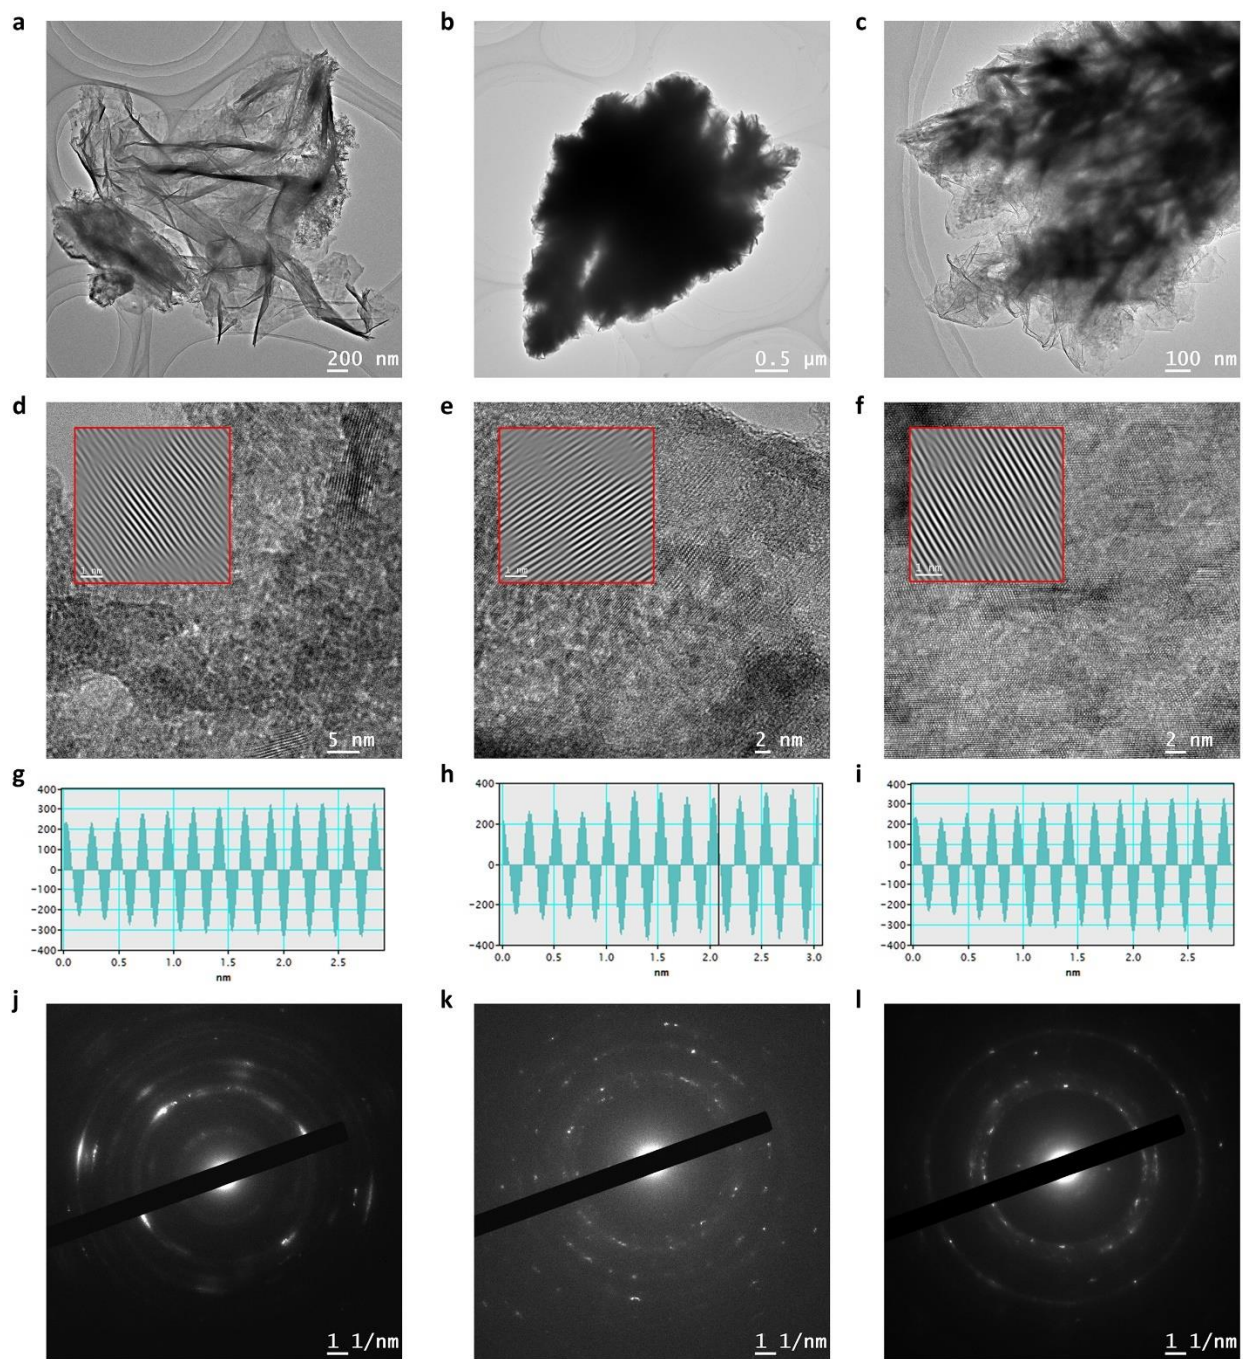

214  
 215 **Supplementary Fig. 31** | TEM images of synthesized Co catalysts particles obtained via ultra-  
 216 sonification from substrate: **a**, Co nanoarray; **b**, Co 3D framework; **c**, Co 3D Nanoarray. **d,e,f**, and **g,h,i**,  
 217 show high resolution images and lattice spacing image of the particles, respectively. **j,k,l**, shows SAED  
 218 pattern of synthesized catalysts, respectively.

219



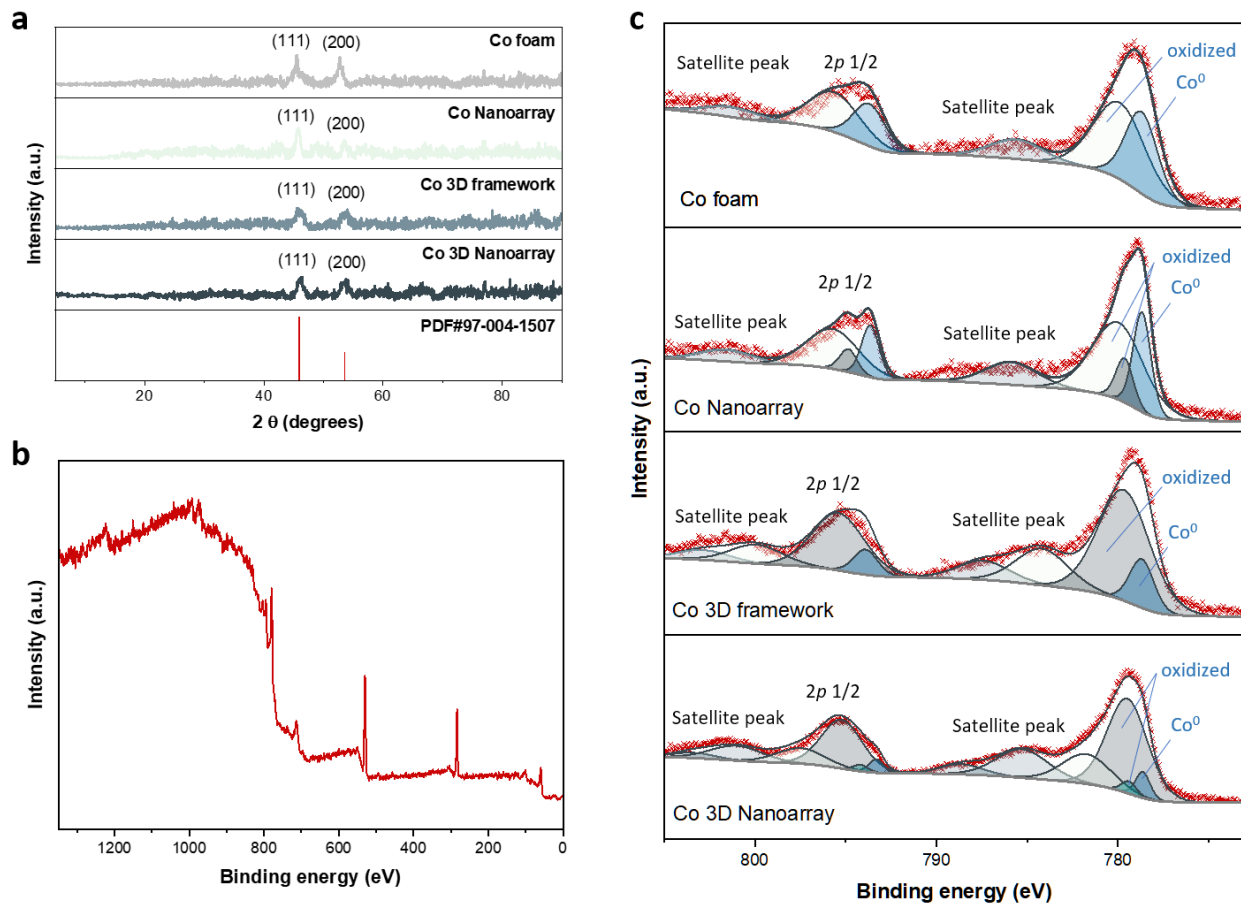

220

221 **Supplementary Fig. 32** | **a**, Powder XRD data of synthesized Co foam, Co Nanoarray, Co 3D framework

222 and Co 3D Nanoarray. **b**, XPS survey of Co 3D Nanoarray. **c**, Co  $2p$  XPS data of synthesized Co catalysts

223 with different morphology.

224

225

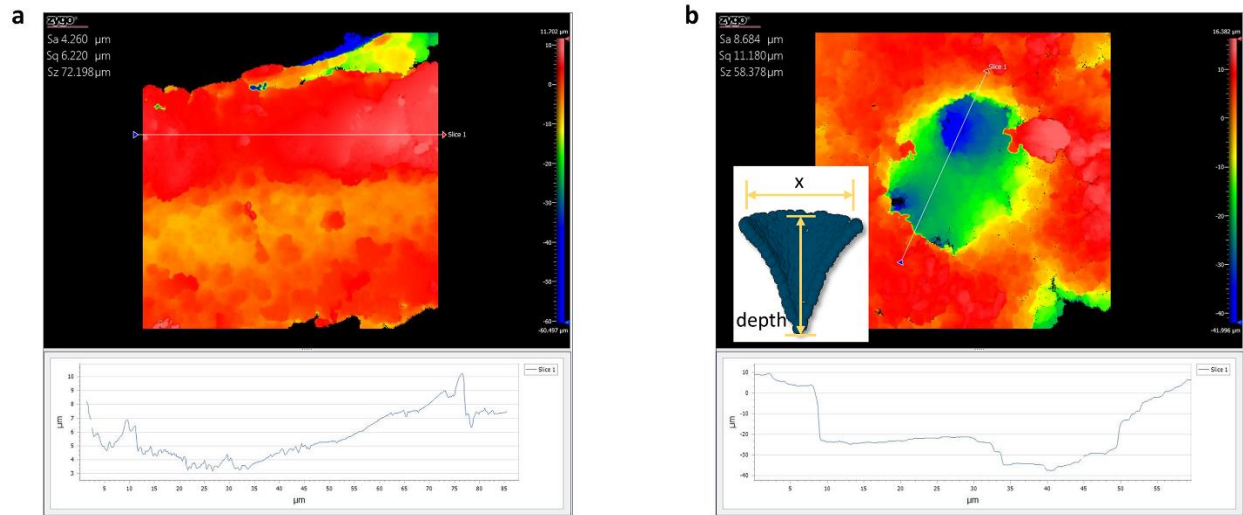

226

227 **Supplementary Fig. 33** | Surface topography of **a**, Co Nanoarray and **b**, Co 3D Nanoarray obtained by  
228 three-dimensional white light interference detection. The lower profile plots the depth versus one-  
229 dimensional position of both nanostructures.

230

231

232

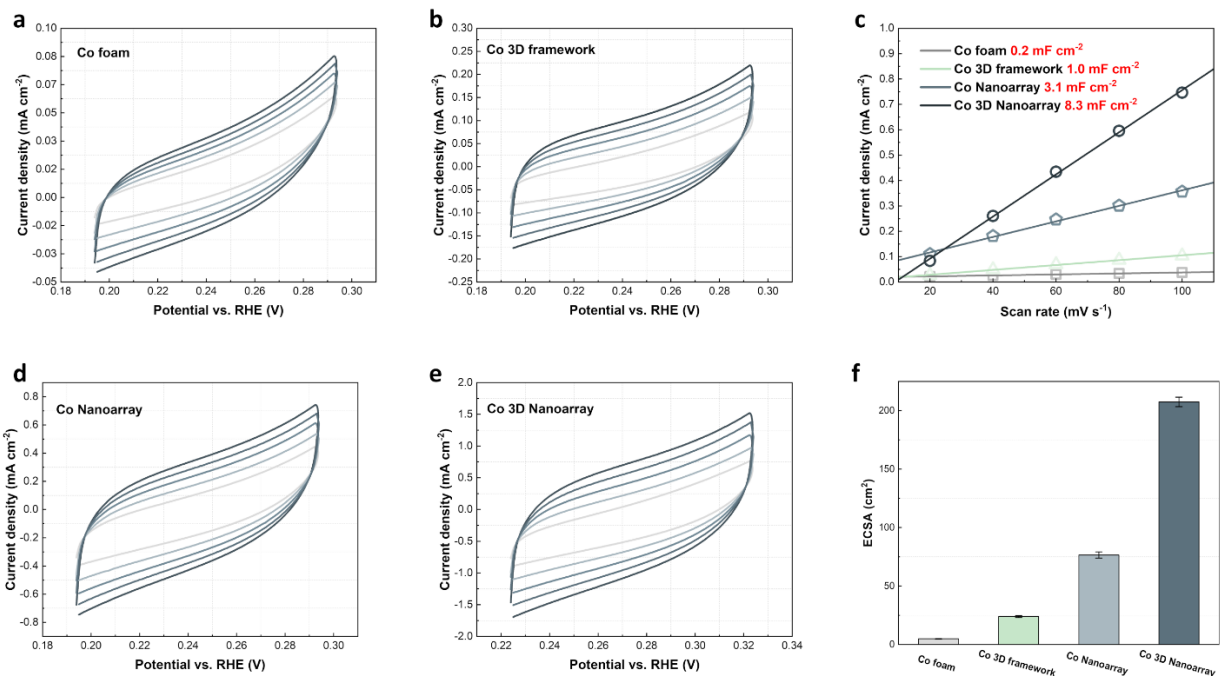

233  
 234 **Supplementary Fig. 34** | CV curves of **a**, Co foam, **b**, Co 3D framework, **d**, Co Nanoarray and **e**, Co 3D  
 235 Nanoarray at 20-100 mV s<sup>-1</sup>. **c**, and **f**, shows double layer capacitance and ECSA of synthesized Co  
 236 catalysts, respective.

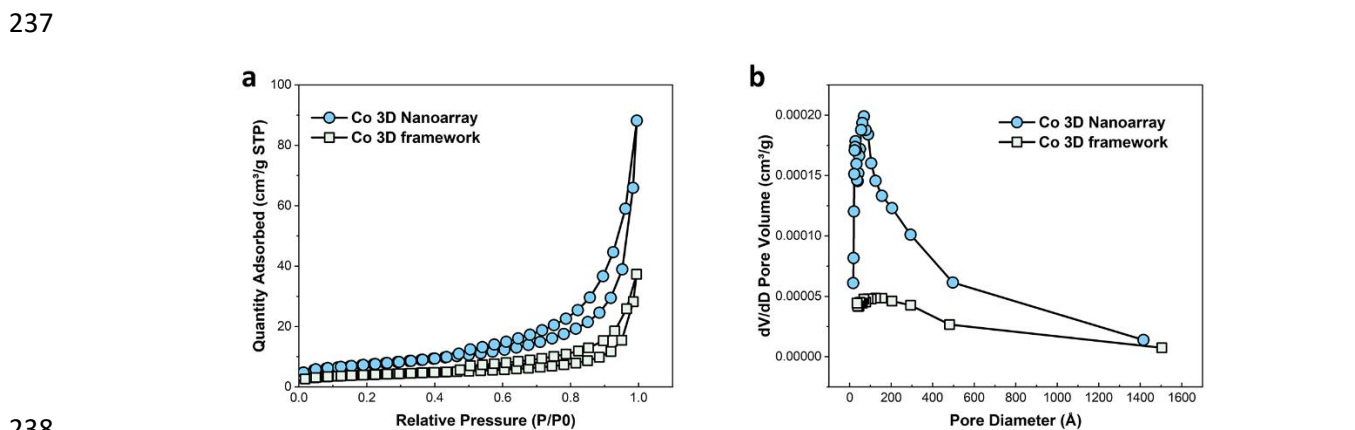

238  
 239 **Supplementary Fig. 35** | **a**, N<sub>2</sub> adsorption-desorption curves of synthesized Co catalysts. **b**, porous size  
 240 distribution of synthesized Co catalysts.

241

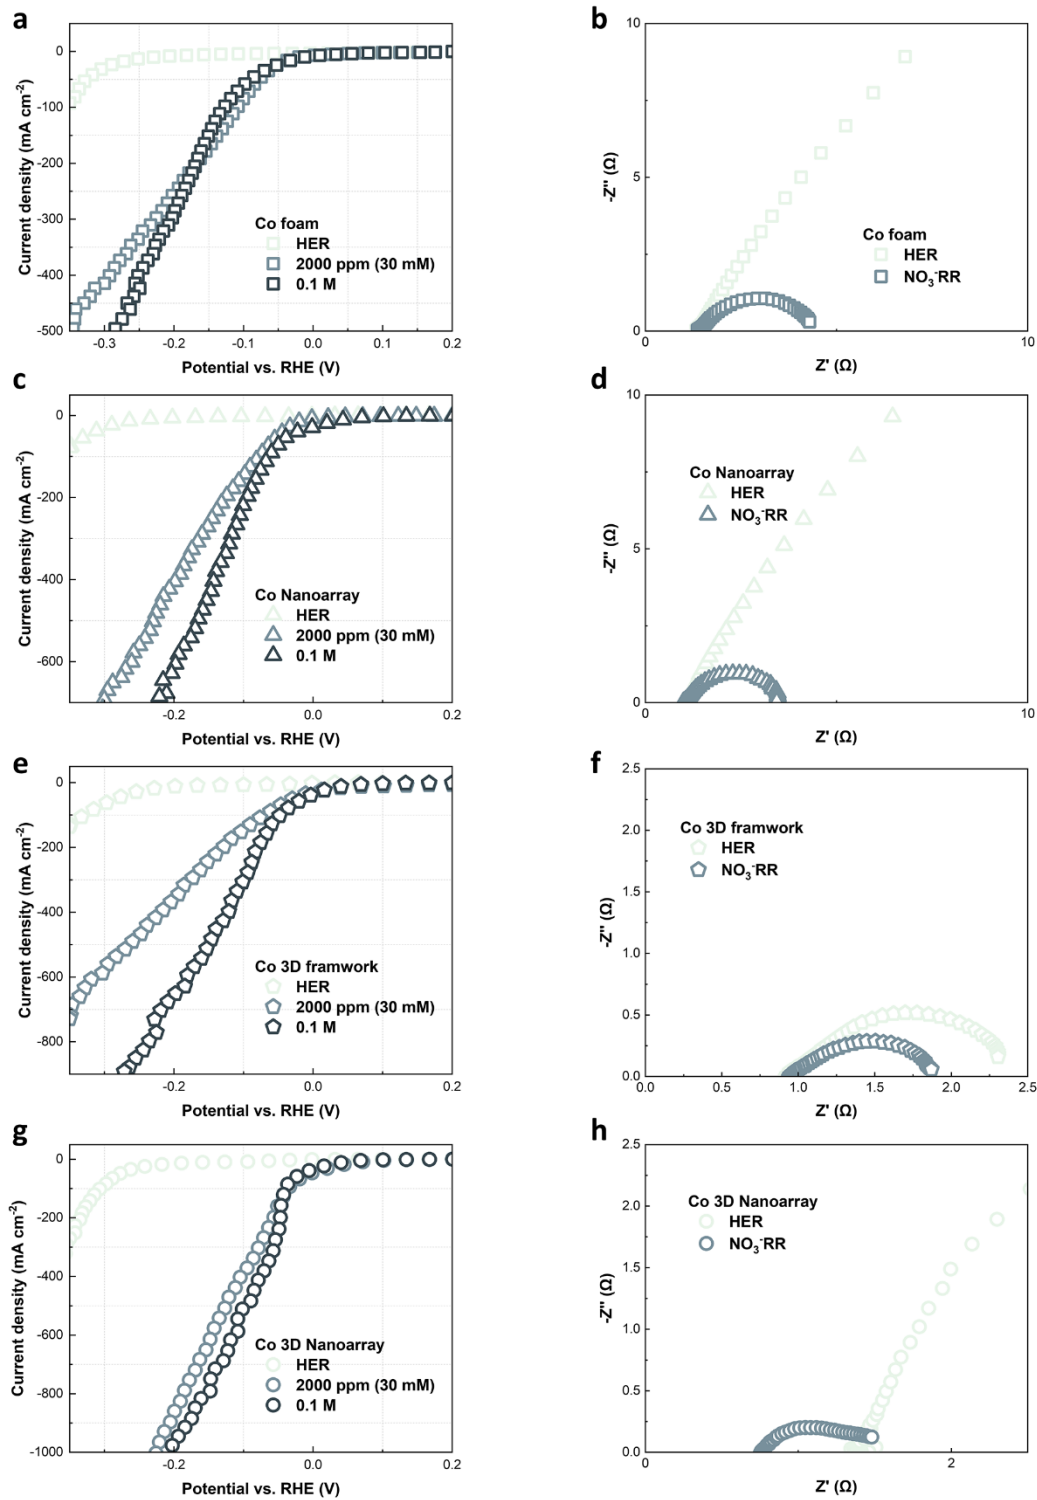

242

243 **Supplementary Fig. 36** | Linear sweep voltammetry curves and EIS measurements of **a,b**, Co foam; **c,d**,  
 244 Co Nanoarray; **e,f**, Co 3D framework; **g,h**, Co 3D Nanoarray. The measurements were conducted with 1  
 245 M KOH with none (HER), 2000 ppm KNO<sub>3</sub> or 0.1 M KNO<sub>3</sub> (for LSV only), respectively.

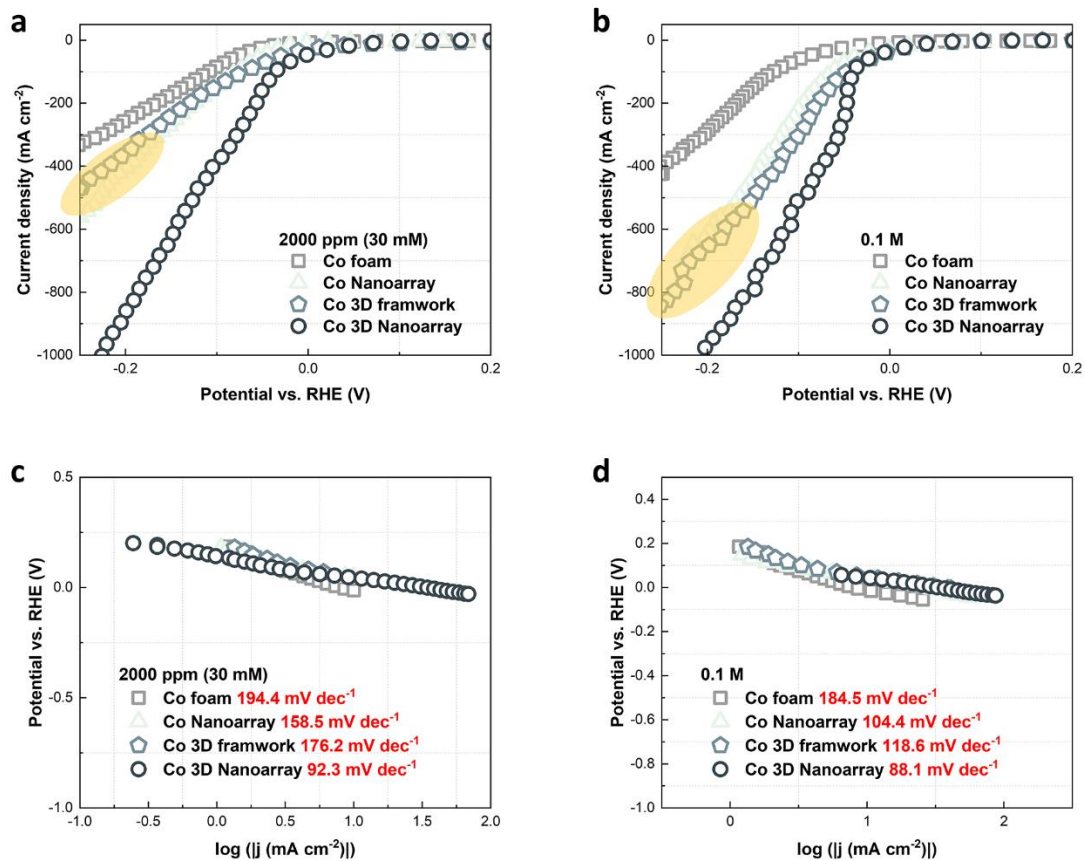

246

247 **Supplementary Fig. 37** | Comparison of I-V relationships for Co catalysts with different morphologies: **a**,

248 2000 ppm KNO<sub>3</sub>; **b**, 0.1 M KNO<sub>3</sub>. **c**, and **d**, show the Tafel plots, respectively.

249

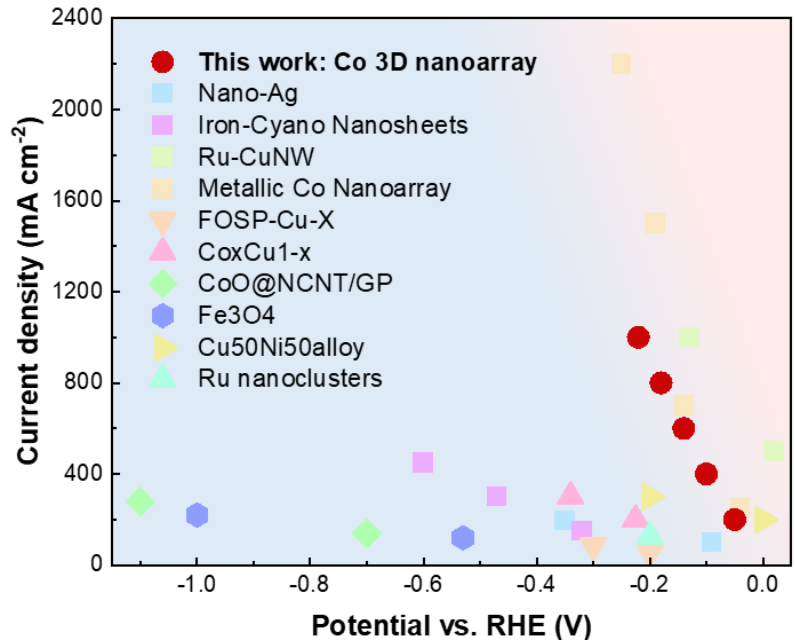

250

251 **Supplementary Fig. 38** | Comparison data of I-V relationships of NO<sub>3</sub><sup>-</sup>RR catalysts that can offer  
 252 current > 100 mA cm<sup>-2</sup> recently reported: current density versus potential (RHE).

253

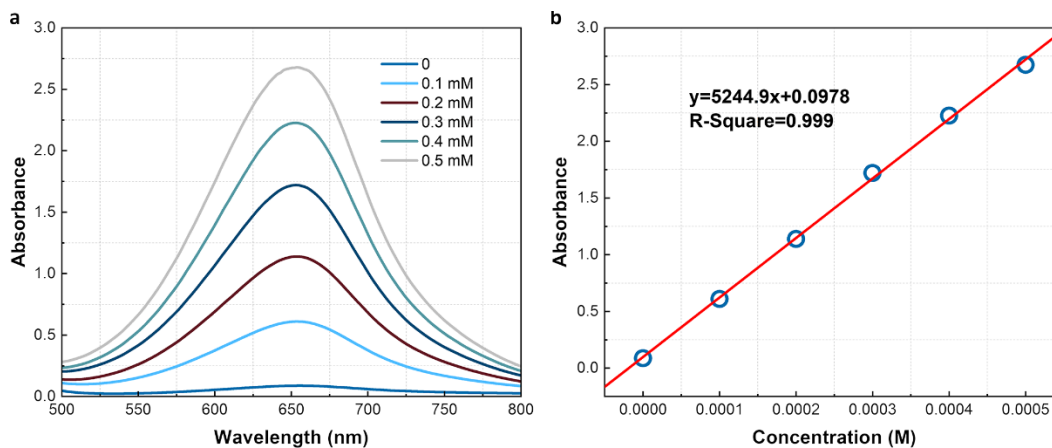

254

255 **Supplementary Fig. 39** | **a**, UV-vis curve of 0, 0.1 mM, 0.2 mM, 0.3 mM, 0.4 mM, 0.5 mM NH<sub>3</sub> in 1 M

256 KOH from 500 nm to 800 nm. **b**, standard calibration line of NH<sub>3</sub> in 1 M KOH.

257

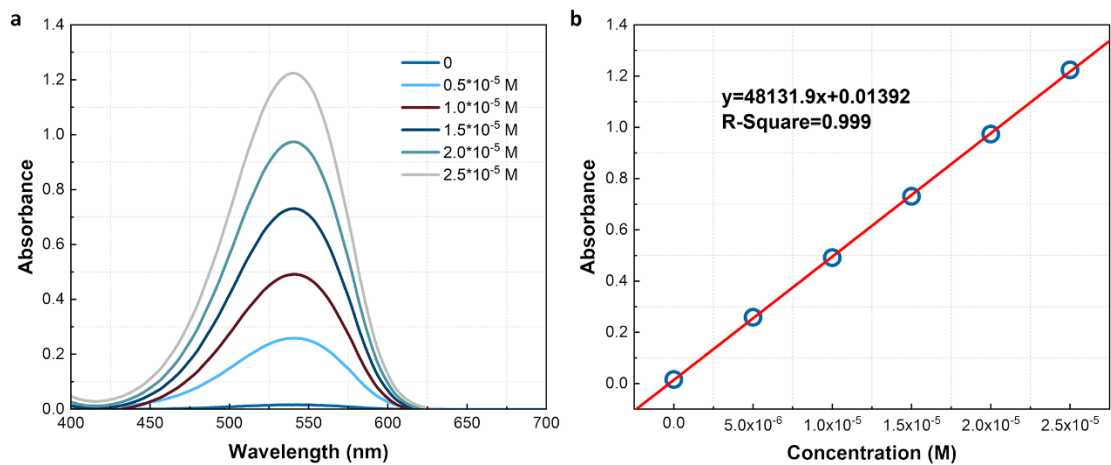

258

259 **Supplementary Fig. 40** | **a**, UV-vis curve of 0,  $0.5 \times 10^{-5}$  M,  $1.0 \times 10^{-5}$  M,  $1.5 \times 10^{-5}$  M,  $2.0 \times 10^{-5}$  M,  $2.5 \times 10^{-5}$

260 M  $\text{KNO}_2$  in neutral pH from 400 to 700nm. **b**, standard calibration line of  $\text{KNO}_2$  in neutral pH.

261

262



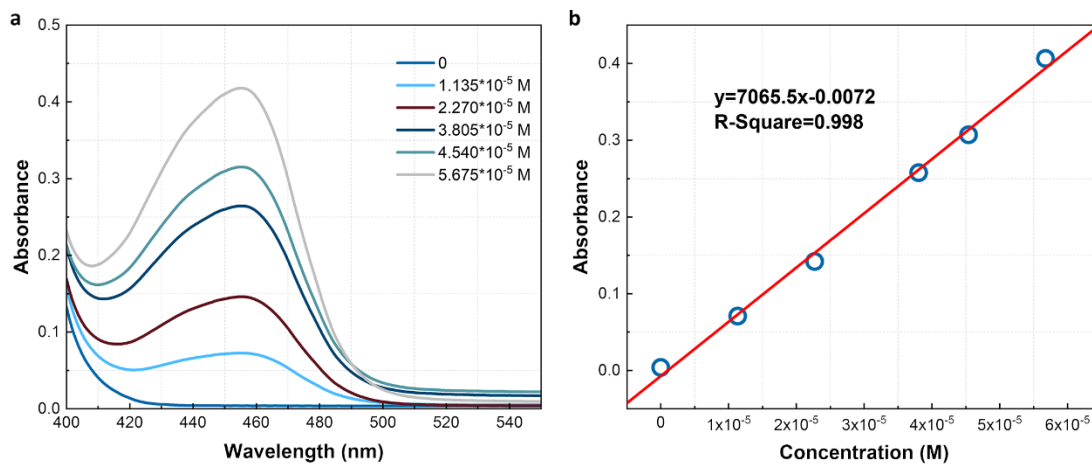

263

264 **Supplementary Fig. 41 | a**, UV-vis curve of 0,  $1.135 \times 10^{-5}$  M,  $2.270 \times 10^{-5}$  M,  $3.805 \times 10^{-5}$  M,  $4.540 \times 10^{-5}$

265 M,  $5.675 \times 10^{-5}$  M  $\text{N}_2\text{H}_4$  in pH=3 from 400 to 550nm. **b**, standard calibration line of  $\text{N}_2\text{H}_4$  in pH=3.

266

267

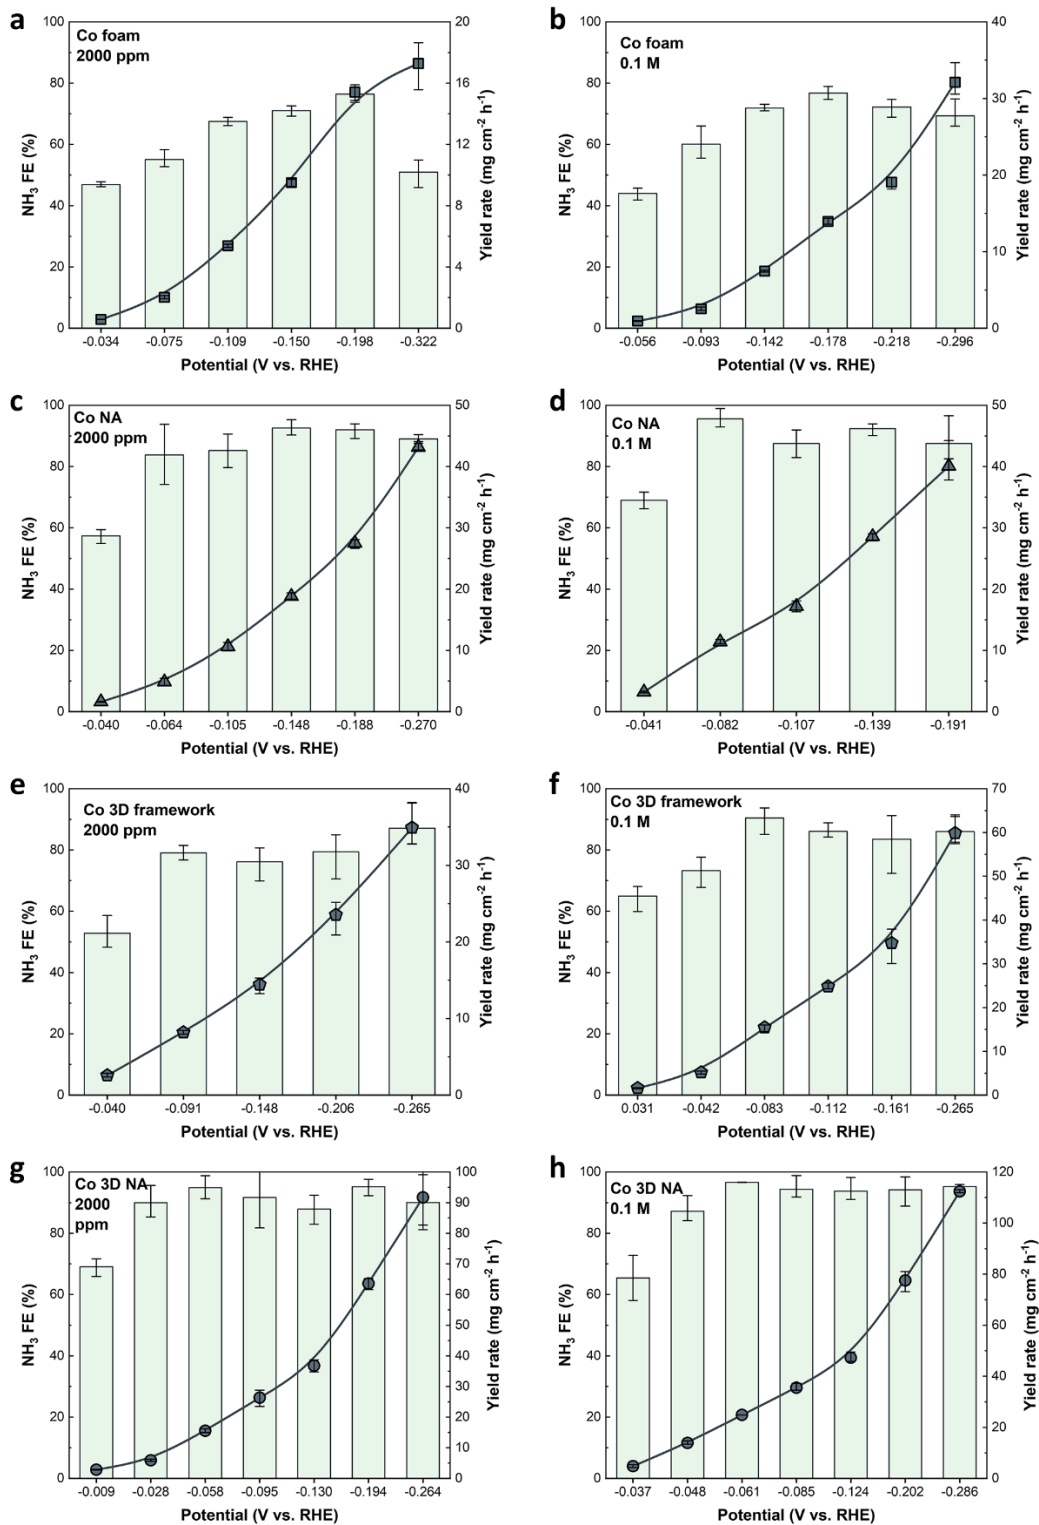

268  
 269 **Supplementary Fig. 42** | NH<sub>3</sub> faradaic efficiency (left Y axis) and accordant NH<sub>3</sub> yield rate (right Y axis)  
 270 of synthesized Co catalysts with 2000 ppm or 0.1 M KNO<sub>3</sub>.

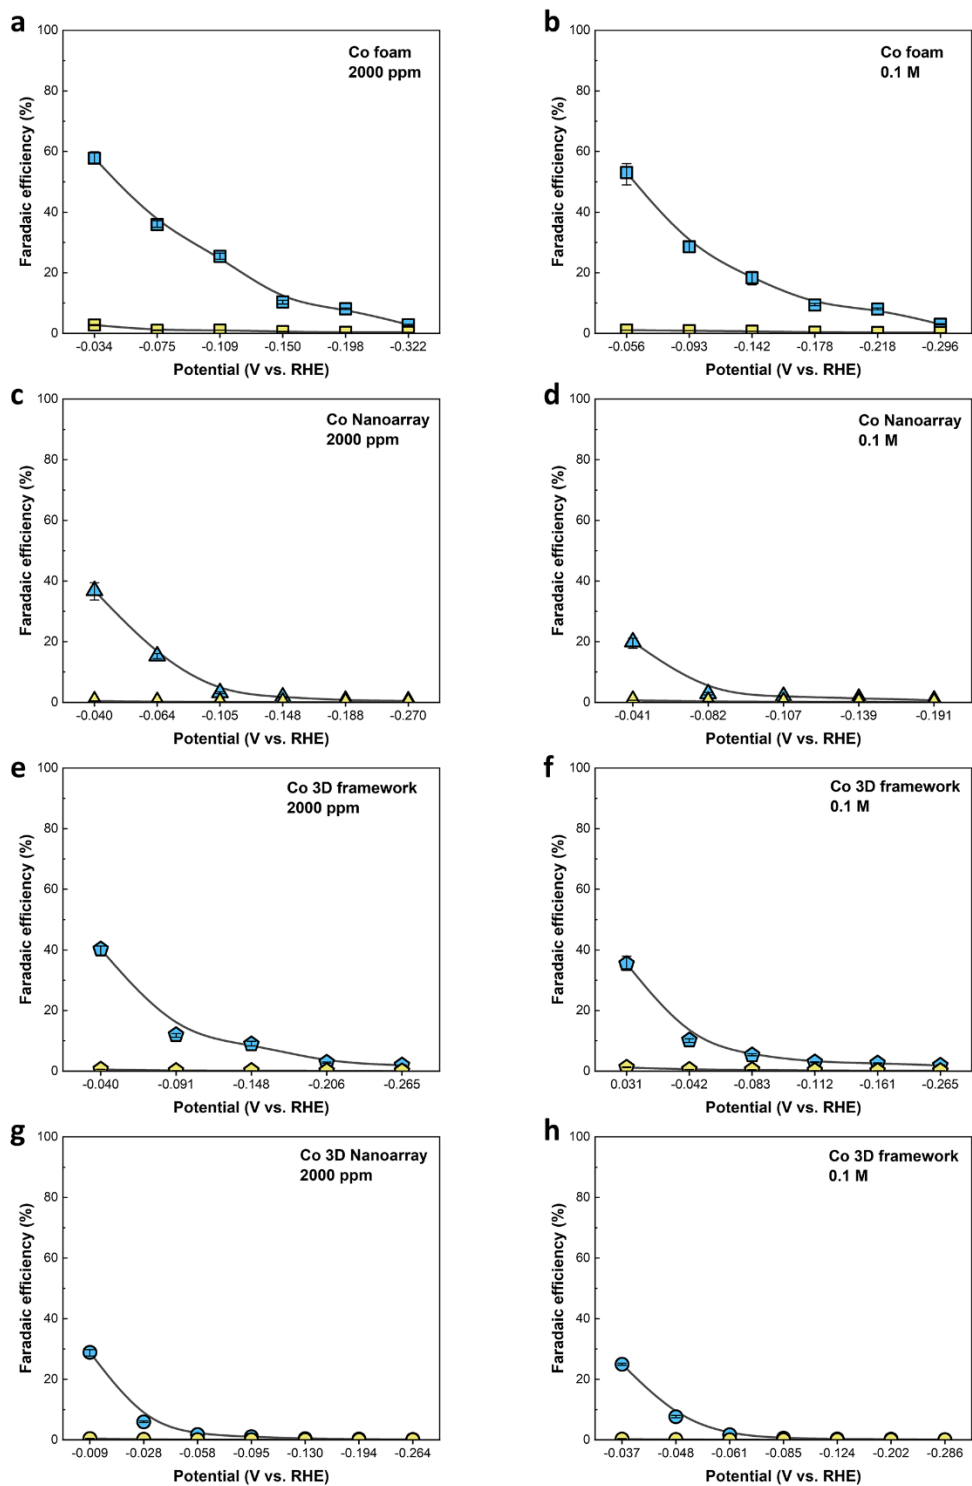

271  
 272 **Supplementary Fig. 43** | Side products NO<sub>2</sub><sup>-</sup> and N<sub>2</sub>H<sub>4</sub> faradaic efficiency synthesized Co catalysts with  
 273 2000 ppm or 0.1 M KNO<sub>3</sub>. NO<sub>2</sub><sup>-</sup> FE are presented in blue symbols and N<sub>2</sub>H<sub>4</sub> FE are in yellow ones.

274

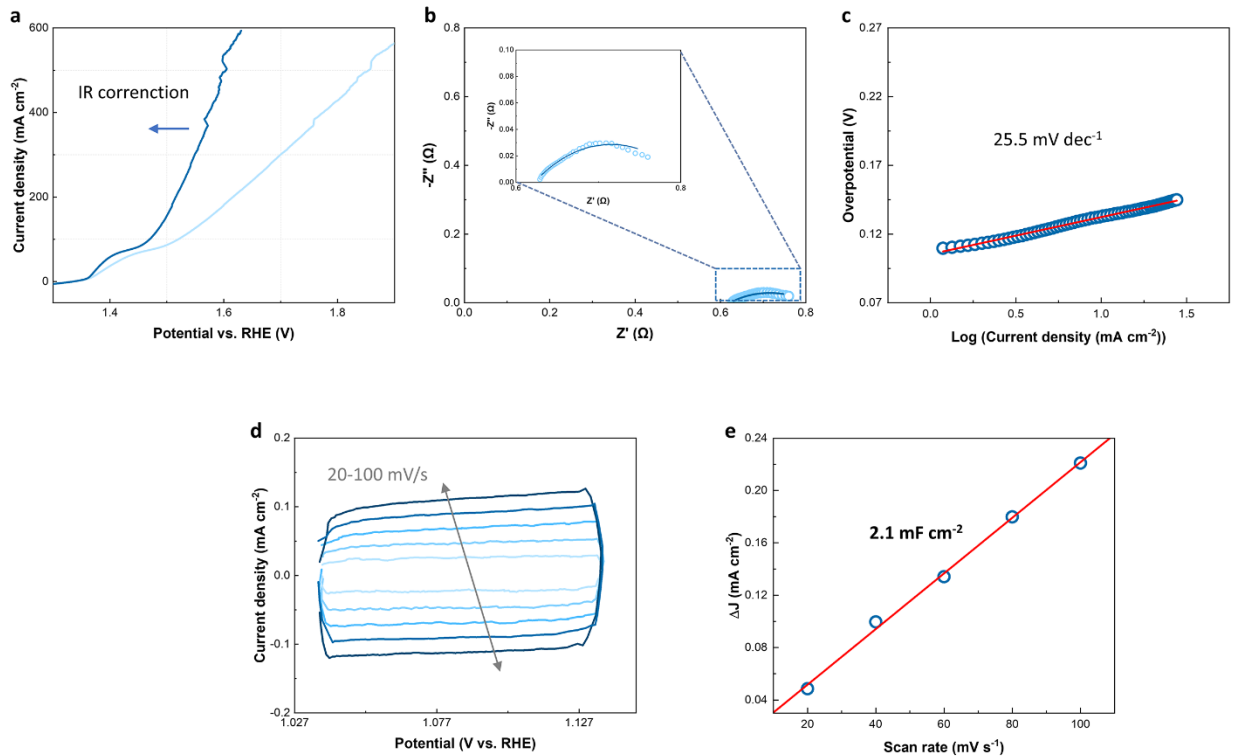

275

276 **Supplementary Fig. 44** | Electrochemical measurements of NiFe anode for OER in 1M KOH. **a**,  
 277 polarization curve at a scan rate of  $5 \text{ mV s}^{-1}$ . **b**, EIS measurements at an oxygen evolution current density  
 278 of  $\sim 10 \text{ mA cm}^{-2}$ . **c**, Tafel plot of NiFe for OER. **d**, Cyclic voltammetry of non-faradaic region of NiFe at  
 279 scan rates  $20\text{-}100 \text{ mV s}^{-1}$  **e**, Plots of current density versus the scan rate for various catalysts for ECSA  
 280 measurements.

281

$$ECSA_{NiFe} = 2.1 \text{ mF cm}^{-2} / 40 \mu\text{F cm}_{ECSA}^{-2} = 52.5 \text{ cm}_{ECSA}^2$$

282

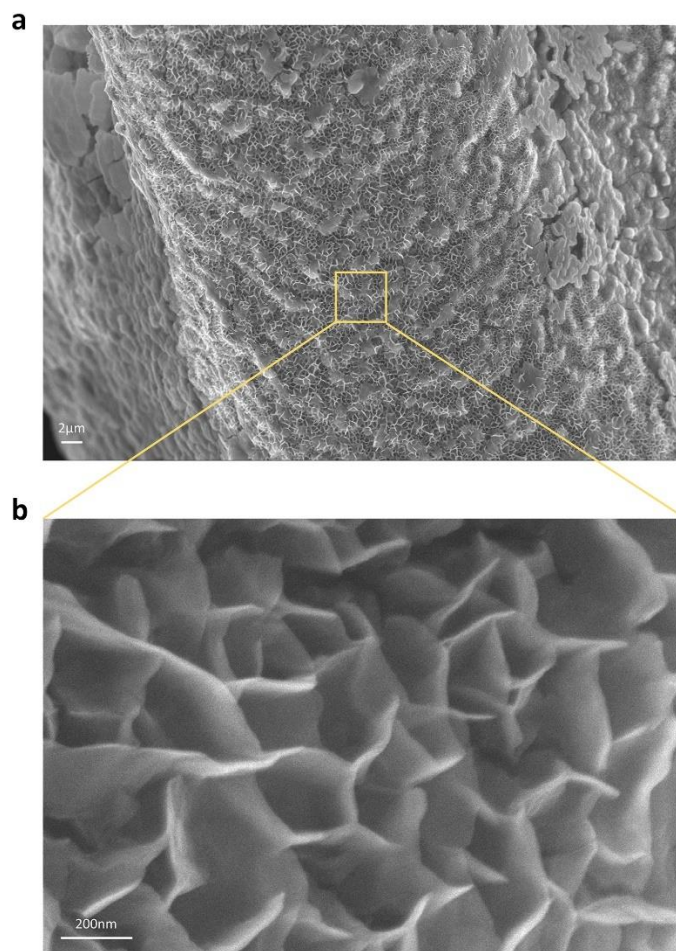

283

284 **Supplementary Fig. 45** | SEM image of NiFe as anode for OER at different magnification before testing.

285

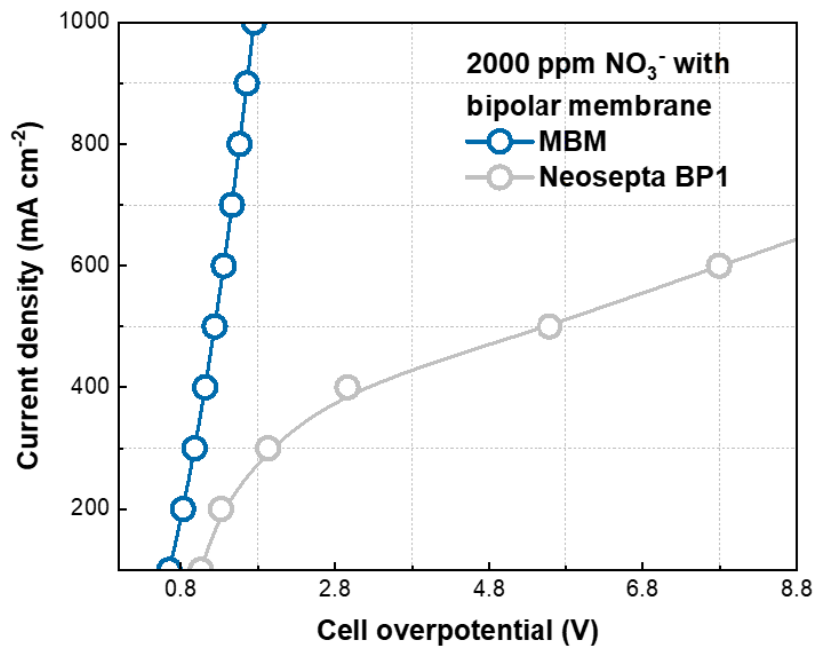

286

287 **Supplementary Fig. 46** | Relationship between current density and cell overpotential of the bipolar  
288 membrane NH<sub>3</sub> electrosynthesis flow cell (2000 ppm NO<sub>3</sub><sup>-</sup>).

289

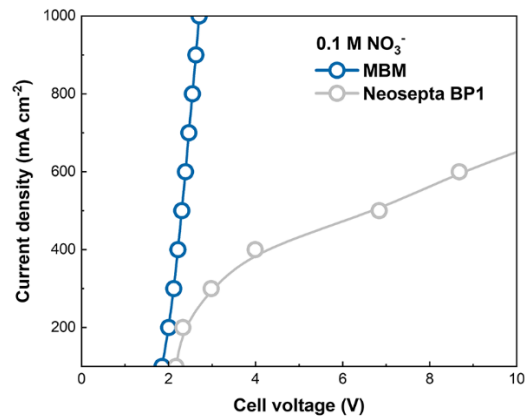

290  
 291 **Supplementary Fig. 47** | Polarization curves of electroreduction nitrate to ammonia in aqueous solutions  
 292 with 1 M KOH/0.1 M KNO<sub>3</sub> in catholyte and 1 M KOH in anolyte.

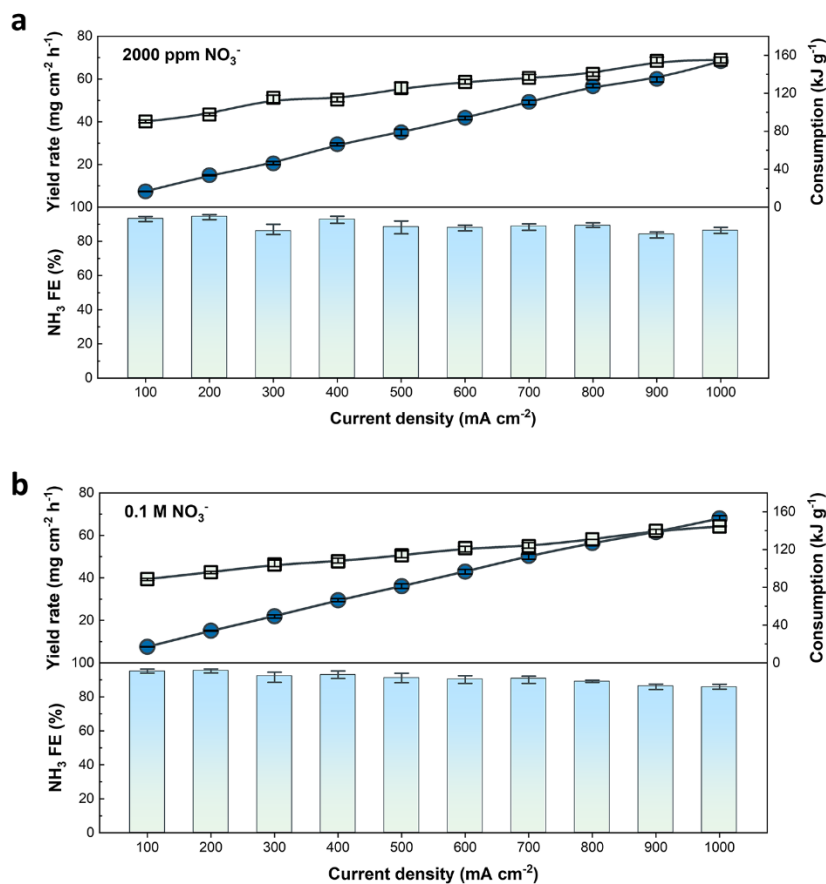

293  
 294 **Supplementary Fig. 48** | NH<sub>3</sub> Faradaic efficiencies (lower bars), yield rates (upper circular scatter-line,  
 295 left Y axis) and energy consumptions (upper rectangular scatter-line, right Y axis) of MBM NH<sub>3</sub>  
 296 electrosynthesis system with **a**, 2000 ppm and **b**, 0.1 M NO<sub>3</sub><sup>-</sup>.

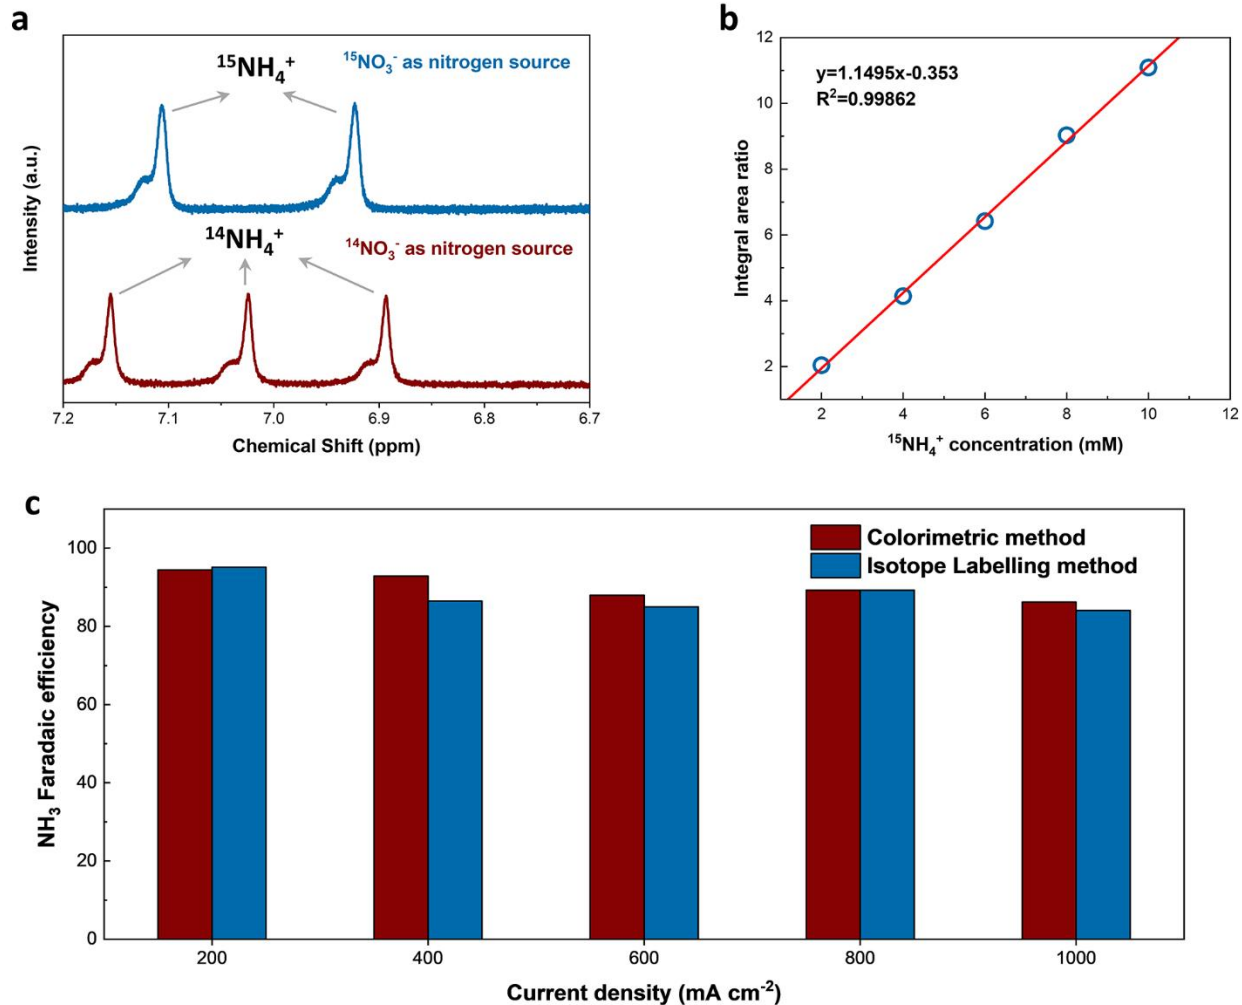

297

298 **Supplementary Fig. 49** | N-15 isotope labelling experiments for  $\text{NH}_3$  determination. **a**,  $^1\text{H}$  NMR  
 299 spectrum of products using  $^{15}\text{NO}_3^-$  and  $^{14}\text{NO}_3^-$  as N-source. **b**, calibration line of  $^{15}\text{NH}_4^+$  concentration. **c**,  
 300 the comparison of Faradaic efficiency between colorimetric method and isotope labelling method.

301



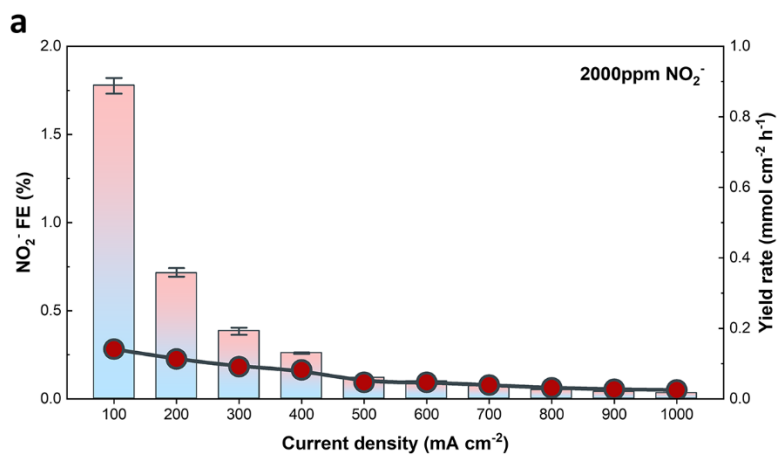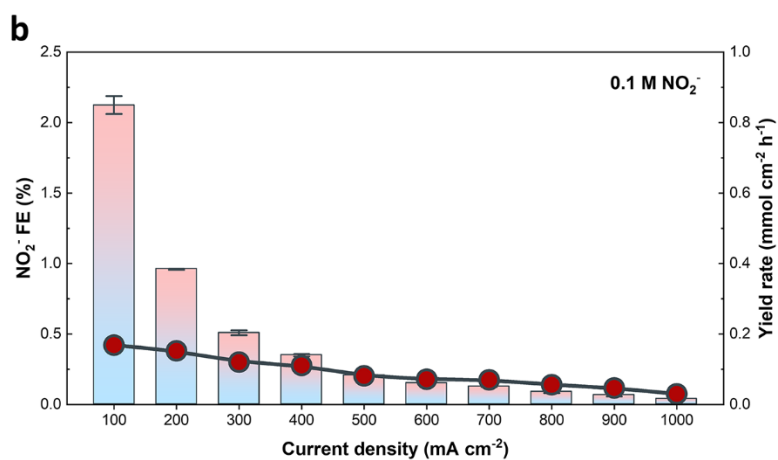

302

303 **Supplementary Fig. 50** | Side products NO<sub>2</sub><sup>-</sup> FE (bars, left Y axis) and yield rates (scatter-line, right Y  
 304 axis) of MBM NH<sub>3</sub> electrosynthesis systems with **a**, 2000 ppm and **b**, 0.1 M NO<sub>3</sub><sup>-</sup>.

305

306

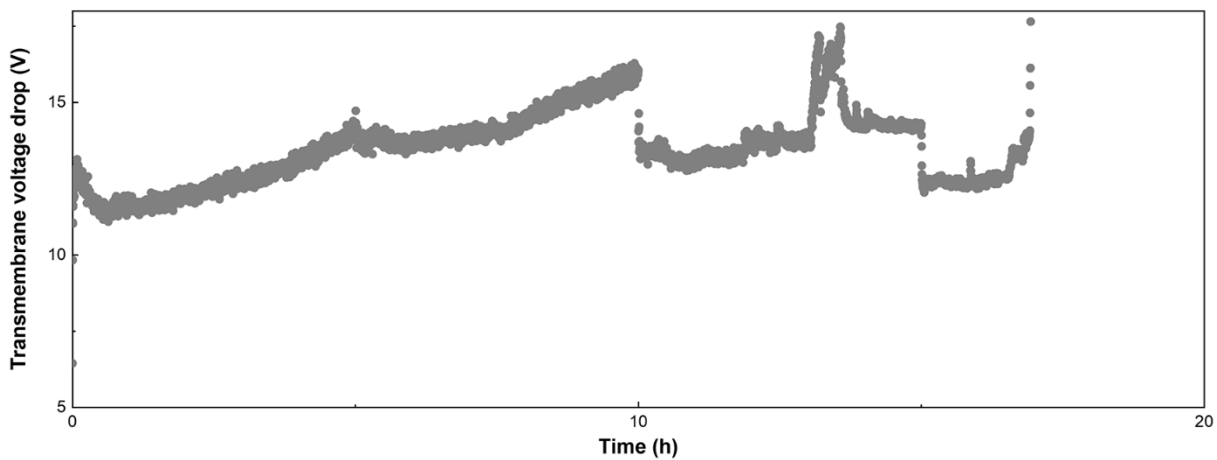

307

308 **Supplementary Fig. 51** | Stability measurements of  $\text{NH}_3$  electrosynthesis system equipped with

309 Commercial BP1 with 1 M  $\text{OH}^-$  and 1 M  $\text{NO}_3^-$  at  $650 \text{ mA cm}^{-2}$

310

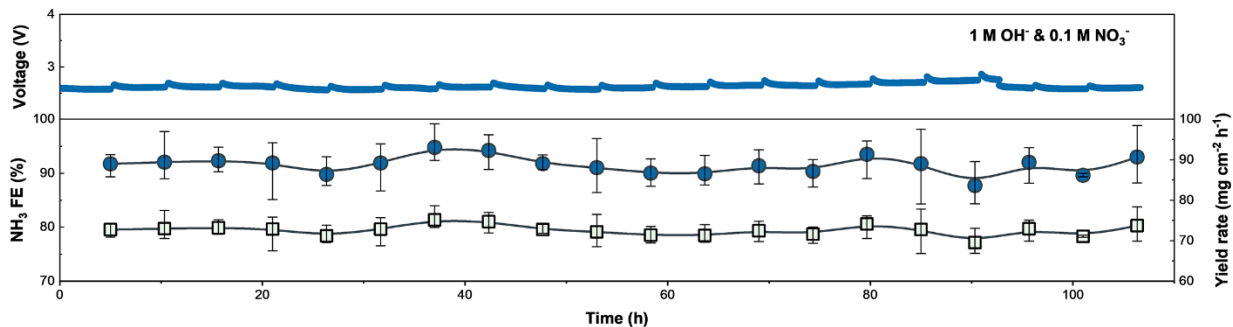

311

312 **Supplementary Fig. 52** | Stability measurements of MBM  $\text{NH}_3$  electrosynthesis systems with 1 M  $\text{OH}^-$

313 and 0.1 M  $\text{NO}_3^-$  at 1  $\text{A cm}^{-2}$ . The lower plots show the  $\text{NH}_3$  FE (circular scatter-line, left Y axis) and yield

314 rates (rectangular scatter-line, right Y axis) versus time; the upper plot shows the cell voltage change

315 versus time.

316

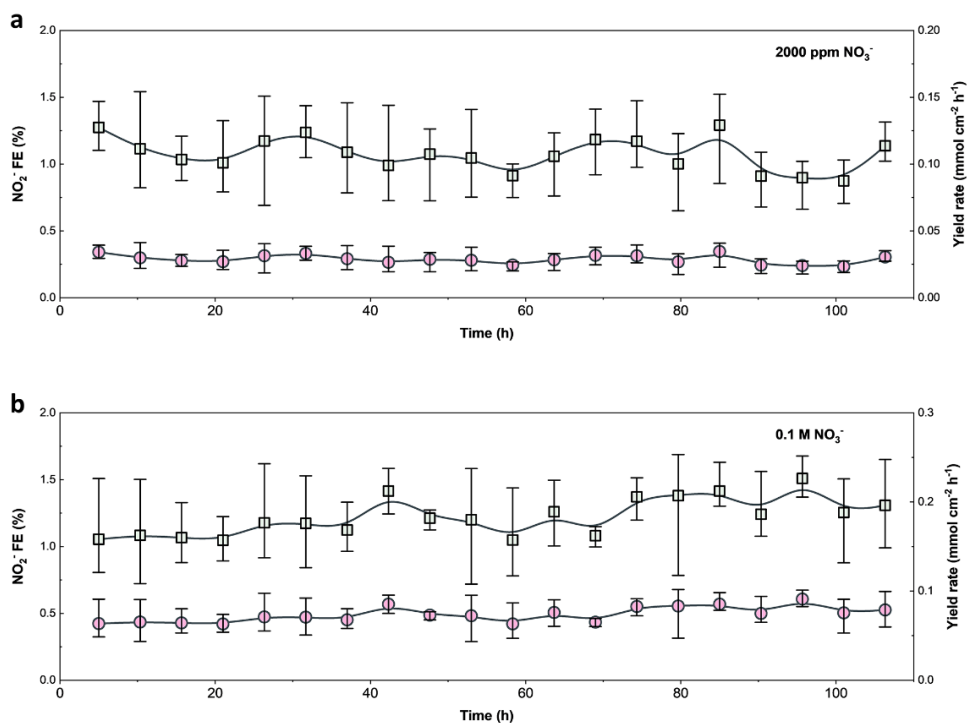

317

318 **Supplementary Fig. 53** | side products  $\text{NO}_2^-$  recording during  $\text{NH}_3$  synthesis stability measurements with

319 MBM flow cell with **a**, 2000 ppm and **b**, 0.1 M  $\text{NO}_3^-$ .  $\text{NO}_2^-$  FE and yield rates are represented by circular

320 (left Y axis) and rectangular (right Y axis), respectively.

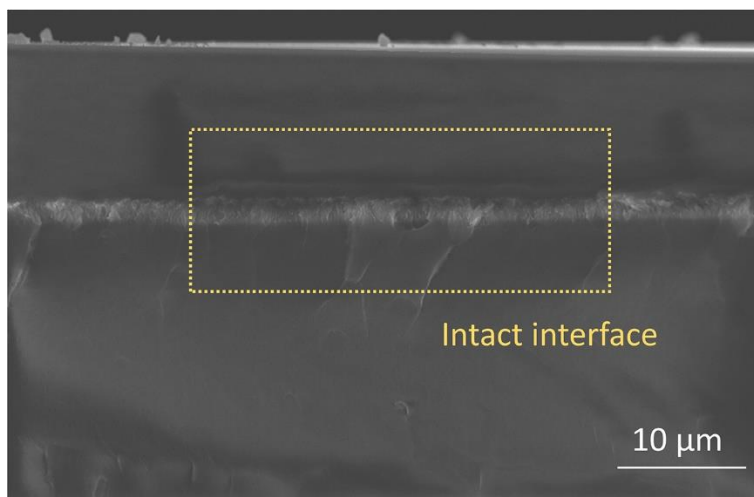

321

322 **Supplementary Fig. 54** | SEM image of MBM interface morphology after NH<sub>3</sub> electrosynthesis.

323

324 **II. Supplementary Tables**

325 **Supplementary Table 1. The transmembrane voltage drops at 10 mA cm<sup>-2</sup>, 50 mA cm<sup>-2</sup> and 100 mA**  
 326 **cm<sup>-2</sup> of bipolar membrane commercial-available or reported in recent 5 years.**

| <b>Bipolar membrane</b>                             | <b>*U10/V</b> | <b>U50/V</b> | <b>U100/V</b> | <b>Electrolyte(s)</b>                   | <b>year</b>      | <b>Ref.</b>   |
|-----------------------------------------------------|---------------|--------------|---------------|-----------------------------------------|------------------|---------------|
| MBM                                                 | 0.65          | 0.73         | 0.76          | 0.5 M Na <sub>2</sub> SO <sub>4</sub>   | <b>This work</b> |               |
| Neosepta BP1                                        | 0.68          | 0.98         | 1.02          | 0.5 M Na <sub>2</sub> SO <sub>4</sub>   | Commercial       |               |
| SBM-NC2.0                                           | 0.8           | 1.1          | -             | 0.5 M Na <sub>2</sub> SO <sub>4</sub>   | 2022             | <sup>1</sup>  |
| 0.5hFCBM                                            | 0.74          | 0.76         | 0.77          | 1 M Na <sub>2</sub> SO <sub>4</sub>     | 2022             | <sup>2</sup>  |
| HBM-SG10                                            | 2.2           | 4.43         | -             | 0.5 M NaCl                              | 2022             | <sup>3</sup>  |
| BPM-E3                                              | 1.6           | 2.6          | 4             | 2 M Na <sub>2</sub> SO <sub>4</sub>     | 2021             | <sup>4</sup>  |
| SCBM                                                | 0.8           | 1.08         | 1.1           | 0.5 M NaCl                              | 2021             | <sup>5</sup>  |
| SBM-D1.0                                            | 0.85          | 1.5          | -             | 0.5 M NaCl                              | 2021             | <sup>6</sup>  |
| PIL-6h-BPM                                          | -             | 1.4          | 1.87          | 1 M Na <sub>2</sub> SO <sub>4</sub>     | 2021             | <sup>7</sup>  |
| LBL BPM                                             | -             | 1.3          | 1.65          | 1 M KHNO <sub>3</sub>                   | 2021             | <sup>8</sup>  |
| Fe <sub>2</sub> O <sub>3</sub> @GO-incorporated BPM | 0.6           | 0.8          | 0.89          | 0.5 M NaCl                              | 2020             | <sup>9</sup>  |
| Fe(III)@PEI-based BPM                               | -             | 1.15         | 1.8           | 0.5 M Na <sub>2</sub> SO <sub>4</sub>   | 2020             | <sup>10</sup> |
| 3D BPM with                                         | -             | 1.2          | 1.6           | 1 M H <sub>2</sub> SO <sub>4</sub> /1 M | 2019             | <sup>11</sup> |

|                                    |      |      |     |                                                 |                    |
|------------------------------------|------|------|-----|-------------------------------------------------|--------------------|
| 100 $\mu\text{g cm}^{-2}$ GOx      |      |      |     | NaOH                                            |                    |
| BPM2                               | 3    | 6.1  | 9   | 2 M NaCl                                        | 2019 <sup>12</sup> |
| bipolar membrane<br>(I)            | -    | 0.9  | 1.1 | 1 M H <sub>2</sub> SO <sub>4</sub> /1 M<br>NaOH | 2018 <sup>13</sup> |
| BPMs with<br>MoS <sub>2</sub> (90) | 1.13 | 2.65 | -   | 0.5 M NaCl                                      | 2018 <sup>14</sup> |
| BPM-PGO/QGO                        | 2    | 4.5  | -   | 1 M H <sub>2</sub> SO <sub>4</sub> /1 M<br>NaOH | 2018 <sup>15</sup> |
| 4GO BPM                            | 1.02 | -    | -   | 1 M HCl/1 M<br>NaOH                             | 2018 <sup>16</sup> |
| 4:1 EDOT/PMA<br>dip-made BPM       | 1.4  | -    | -   | 1 M NaClO <sub>4</sub>                          | 2017 <sup>17</sup> |
| MIL-101 bipolar<br>membrane        | 1.05 | 3.6  | 4.2 | 0.5 M NaCl                                      | 2017 <sup>18</sup> |
| BPM-3D                             | 0.8  | 0.95 | 1   | 0.5 M Na <sub>2</sub> SO <sub>4</sub>           | 2017 <sup>19</sup> |
| BPM-LYS                            | 1.8  | 3.1  | -   | 0.1 M NaCl                                      | 2017 <sup>20</sup> |

327 \* U10, U50, U100 represents for the transmembrane voltage drops at WD current of 10 mA cm<sup>-2</sup>, 50 mA

328 cm<sup>-2</sup> and 100 mA cm<sup>-2</sup>.

329

330 **Supplementary Table 2. Comparison of NH<sub>3</sub> electrosynthesis systems from nitrate with high**  
 331 **performance recently reported.**

| <b>Electrochemical device</b> | <b>NH<sub>3</sub> Faradaic efficiency/%</b>         | <b>*Current density/<br/>mA cm<sup>-2</sup></b> | <b>NH<sub>3</sub> yield<br/>rate/<br/>mg h<sup>-1</sup> cm<sup>-2</sup></b> | <b>Catalyst</b>            | <b>Ref.</b>          |
|-------------------------------|-----------------------------------------------------|-------------------------------------------------|-----------------------------------------------------------------------------|----------------------------|----------------------|
| bipolar membrane<br>flow cell | 86.2<br>(2000 ppm<br>NO <sub>3</sub> <sup>-</sup> ) | 1000                                            | 68.4                                                                        | Co 3D nanoarray            | <b>This<br/>work</b> |
| batched H-cell                | 85.9                                                | 5.49<br>(NH <sub>3</sub> )                      | 0.435                                                                       | Cu-PTCDA                   | 21                   |
| batched H-cell                | 95.8                                                | 52.5<br>(NH <sub>3</sub> )                      | 7.136                                                                       | Cu/Cu <sub>2</sub> O NWAs  | 22                   |
| flow cell                     | 86                                                  | 60.7<br>(NH <sub>3</sub> )                      | 4.812                                                                       | Fe single<br>atom catalyst | 23                   |
| batched H-cell                | 35                                                  | 4.25<br>(NH <sub>3</sub> )                      | 0.337                                                                       | Pd                         | 24                   |
| batched H-cell                | 100                                                 | 34.6<br>(NH <sub>3</sub> )                      | 2.75                                                                        | Fe-PPy SAC                 | 25                   |
| batched H-cell                | 85                                                  | 9.65<br>(NH <sub>3</sub> )                      | 0.765                                                                       | TiO <sub>2-x</sub>         | 26                   |
| flow cell                     | 82                                                  | 22<br>(NH <sub>3</sub> )                        | 1.744                                                                       | Ti                         | 27                   |
| batched H-cell                | 100                                                 | 251<br>(NH <sub>3</sub> )                       | 19.89                                                                       | Ru<br>nanoclusters         | 28                   |

|                          |       |                           |                                                            |                                         |    |
|--------------------------|-------|---------------------------|------------------------------------------------------------|-----------------------------------------|----|
| flow cell                | 99.1  | 90<br>(NH <sub>3</sub> )  | 7.136                                                      | Cu <sub>50</sub> Ni <sub>50</sub> alloy | 29 |
| batched H-cell           | 91.5  | 150                       | 12.263                                                     | Fe <sub>3</sub> O <sub>4</sub>          | 30 |
| batched H-cell           | 93.8  | 125                       | 9.041                                                      | CoO@NCNT/GP                             | 31 |
| Electro-reaction<br>tank | 100   | 12.8                      | 2.335                                                      | GaInSn                                  | 32 |
| batched H-cell           | 95    | 176<br>(NH <sub>3</sub> ) | -                                                          | CoxCu1-x                                | 33 |
| batched H-cell           | 93.91 | -                         | 0.1014                                                     | FOSP-Cu-X                               | 34 |
| batched H-cell           | 96    | 2200<br>(I-V test)        | 176.8                                                      | Metallic Co<br>Nanoarray                | 35 |
|                          | 98    | 500<br>(stability)        | ~34                                                        |                                         |    |
| flow-system H-cell       | 93    | 1000<br>(I-V test)        | 76.5                                                       | Ru-CuNW                                 | 36 |
|                          | >90   | 400<br>(stability)        | ~29.6                                                      |                                         |    |
| batched H-cell           | 90    | ~450                      | 42.1 mg h <sup>-1</sup><br>mg <sub>cat</sub> <sup>-2</sup> | Iron-Cyano<br>Nanosheets                | 37 |
| batched H-cell           | 89.6  | 194.31                    | 2.89                                                       | Nano-Ag                                 | 38 |

332 \* Current density data noted with NH<sub>3</sub> in bracket represents for the value of NH<sub>3</sub> partial current density.

333



### 334 III. Supplementary Notes

#### 335 **Supplementary Note 1. The necessity of using flow cell equipped with bipolar membrane for NH<sub>3</sub>** 336 **electrosynthesis from nitrate with alkaline electrolytes.**

337 Most reported works for NH<sub>3</sub> electrosynthesis from nitrate are evaluated in H-cell equipped with an  
338 cation exchange membrane (normally are Nafion-based) or anion exchange membrane. It cannot be  
339 denied that such system with 3-electrode setup can support a convenient and accurate evaluation for the  
340 advanced 8-electron catalysts designed in the research works. However, H-cell with monolayer ion  
341 exchange membranes might not realize a continuous NH<sub>3</sub> electrosynthesis in an industrial scale for the  
342 two reasons as followed:

- 343 i) A flow cell system has been proved reveals predominance in aspect of energy consumption  
344 compared with H-cell in several electrochemical applications<sup>39, 40</sup>, for the membrane electrode  
345 assembly design can to the largest extent lower the distance of electrodes; thus, most part of  
346 ohmic resistance from electrolytes can be avoided.
- 347 ii) As shown in Fig. 1 in the main text, the existence of membrane can avoid the crossover of  
348 produced NH<sub>3</sub> from cathode to anode and be re-oxidized again. Nevertheless, a monolayer  
349 membrane cannot maintain the balance of ionic potentials for long-term electrolysis. For example,  
350 cations (Na<sup>+</sup> or K<sup>+</sup>) will play as charge carriers and move from cathode to anode when systems  
351 are equipped with proton exchange membrane. The transported cations cannot be consumed by  
352 electro-reactions, and can lead to an unbalanced potential of both sides. Such situation can cause  
353 an extra energy consumption and might increase with the operation time. Similarity, anion  
354 exchange membranes cannot prevent NO<sub>3</sub><sup>-</sup> (as reactant) from leaking and mixing with anolyte.  
355 On the contrary, bipolar membrane can force the H<sup>+</sup>/OH<sup>-</sup> producing from water dissociation as  
356 charge carriers in the systems, and a continuous process can be achieved by distilling synthesized  
357 NH<sub>3</sub> and refilling HNO<sub>3</sub> to cathode termly. Another potential advantage of using bipolar

358 membrane is the ability of separating electrolytes with different pH. Sometimes the optimal pH  
359 for adopted  $\text{NO}_3\text{RR}$  and OER catalysts are in consistent, both of which can be operated in  
360 unsymmetrical electrolytes with a bipolar membrane.

361

362

363 **Supplementary Notes 2. Numerical simulation modelling and detailed discussion of results.**

364 A one-dimensional bipolar membrane model for numerical simulation was built up, as shown in  
365 Supplementary Fig. 1., including a symmetrical diffusion boundary layer of 10  $\mu\text{m}$  thickness, a 50  $\mu\text{m}$   
366 cation exchange layer (CEL) and a 50  $\mu\text{m}$  anion exchange layer (AEL). According to the experiments,  
367 there is a distinct difference on IEC of both layers (AEL-2.8  $\text{mmol cm}^{-3}$ ; CEL-0.9  $\text{mmol cm}^{-3}$ ). Water  
368 dissociation (WD) takes place at the interlayer of bipolar membrane. In order to simplify the modelling,  
369 interlayers of bipolar membranes were set as an interrupt interlayer. Two types of bipolar membranes  
370 were simulated here, including one normal bipolar membrane and one special bipolar membrane with  
371 enhanced WD rate as well as ionic transportation.

372 Two individual parameters were adjusted to describe the difference of both membranes numerically: i)  
373 WD constant rate of special membrane was set one-fold higher than that of normal membrane to describe  
374 the enhancement of WD reaction. ii) tortuosity  $\varepsilon$  was set one-fold higher of special membrane to describe  
375 the increase of ionic diffusivity in membrane. For explanation of ii), there is no thickness of interlayer in  
376 the simplified 1D model, thus ionic transportation from interlayer to membrane layer can be considered as  
377 one part of whole ionic diffusivity process and can influence the value of  $\varepsilon$ .

378 The operation was set to perform in 0.5 M  $\text{Na}_2\text{SO}_4$  in a reverse bias of bipolar membrane, when  $\text{H}^+$  and  
379  $\text{OH}^-$  can be generated at the interfacial region. As previous reported, the potential distribution and ionic  
380 transport obey Poisson's equation and the Nernst-Planck equation<sup>41, 42</sup>. Also, WD constant rate can  
381 be affected by electric field based on Onsager's weak electrolyte theory<sup>43, 44</sup>. All parameters and initial  
382 conditions referred for simulations are listed in the table as followed<sup>45</sup>:

| Parameter | Value                     | Description           |
|-----------|---------------------------|-----------------------|
| L_mem     | 0.05[mm]                  | Membrane thickness    |
| L_sdl     | 0.01[mm]                  | Diffusion boundary    |
| c0        | 0.5[kmol/m <sup>3</sup> ] | Initial concentration |

|            |                                         |                                                  |
|------------|-----------------------------------------|--------------------------------------------------|
| delta_phil | 0[V]                                    | Initial cell voltage                             |
| c_fixCEM   | 0.9[kmol/m <sup>3</sup> ]               | CEM Membrane fix charge                          |
| Kw_0       | 10.64e-14[M <sup>2</sup> ]              | Water dissociation constant<br>at zero field     |
| T          | 25[degC]                                | Temperature                                      |
| A          | 0.5[K <sup>2</sup> *m/V]                | Wien effect coefficient (by<br>Onsager relation) |
| eps_r      | 78                                      | permitivity                                      |
| D_H        | 9.312e-5[cm <sup>2</sup> /s]            | Diffusivity                                      |
| D_OH       | 5.26e-5[cm <sup>2</sup> /s]             | Diffusivity                                      |
| kw_r       | 5e11[M <sup>-1</sup> *s <sup>-1</sup> ] | Backward rate constant<br>water dissociation     |
| c_fixAEM   | 2.8[kmol/m <sup>3</sup> ]               | AEM Membrane fix charge                          |
| D_Na       | 1.334e-5[cm <sup>2</sup> /s]            | Diffusivity                                      |
| D_SO4      | 1.065e-5[cm <sup>2</sup> /s]            | Diffusivity                                      |
| ε          | 0.05                                    | electrolyte volume fraction                      |

383

384 All equations used for numerical simulations are listed and were programmed and solved

385 with COMSOL v 5.6 (1-6):

386 
$$b = \max \left( A * \frac{\text{abs}(E)}{T^2}, \text{eps} \right) \quad (1)$$

387 B is Help variable

388 
$$E = -d(\text{phil}, x) \quad (2)$$

389 E is Electric field

$$390 \quad Kw = Kw_0 * \max\left(\frac{\text{besselj}(1, (2 * \text{sqrt}(2 * b) * l))}{i * \text{sqrt}(\max(b, \text{eps}))}, 1\right) * \text{sqrt}\left(\frac{1}{2}\right) \quad (3),$$

391 using Bessel function from Onsager relation

$$392 \quad kw_f = Kw * kw_r \quad (4)$$

393 kw\_f is Forward rate constant

$$394 \quad rw = kw_f - kw_r * \max(cOH, \text{eps}^2) * \max(cH, \text{eps}^2) \quad (5)$$

395 Reaction rate, water autoprotolysis

$$396 \quad \kappa = F_{const}^2 * \frac{cH * D_H + cOH * D_{OH} + cNa * D_{Na} + cSO4 * D_{SO4}}{R_{const} * T} \quad (6)$$

397 kappa is Conductivity

398

### 399 **Detailed discussion of simulation results:**

400 All discussions are based on the understanding to separate kinetics of bipolar membrane interface to two  
401 parts: including one WD reaction followed by produced H<sup>+</sup> and OH<sup>-</sup> transport to membrane layers  
402 (Supplementary Fig. 4b). These two processes can be affirmed more accurately in EIS measurements  
403 according to the equivalent circuit applied in this work. As shown in Figure 2a and Supplementary Fig. 2,  
404 the concentrations of H<sup>+</sup> and OH<sup>-</sup> can be obviously increased at the same transmembrane voltage drop  
405 after lifting the WD constant rate and tortuosity. Such results keep valid from 0.6V to 1.3V. To be  
406 mentioned here plenty of previous work mentioned a thermodynamic equilibrium potential for WD is  
407 0.83V though, this only come into force when the pH difference ( $\Delta\text{pH}=14$ ) as presented in the following  
408 equation (7)<sup>46</sup>:

$$409 \quad E_{junction}^0 = \frac{RT}{F} \ln\left(\frac{a_{CEM}^{H^+}}{a_{AEM}^{H^+}}\right) \quad (7)$$

410 The concentration enhancement indicates that kinetics of WD reaction and ionic diffusivity can influence  
411 the overall WD rate of bipolar membrane interface, and this effect becomes valid in quite a wide range of  
412 voltage. However, such influence become lower by degrees when transmembrane voltage drop become  
413 relative higher. This might be ascribed to that both WD constant rate and ionic transportation can be  
414 enhanced versus voltage, and the difference of original value become more inconspicuous. In conclusion,  
415 the enhancement of overall kinetics shows most significance and acts as rate-limiting step in a specific  
416 voltage range (or current density range).

417 On the other hand, concentration distribution of  $\text{Na}^+$  and  $\text{SO}_4^{2-}$  of both kind of bipolar membranes shows  
418 similarity (Supplementary Fig. 3). This phenomenon can be explanation by “inert” ions that only decided  
419 by Poisson’s equation and the Nernst-Planck equation, and IEC as well as diffusivity of inert ions are kept  
420 same.

421 As shown in Supplementary Fig. 4, the consequential I-V relationships of kinetics enhanced bipolar  
422 shows preponderance compared to the normal one. Enhancing one of the kinetics factors (no matter WD  
423 constant rate or ionic diffusivity) can partially promote the bipolar membrane water dissociation current  
424 density. Combining the results from Supplementary Fig. 3, this improvement can confidently ascribe to  
425 the produce of  $\text{H}^+/\text{OH}^-$ .

426

427 **Supplementary Note 3. Data statistics method of CoNi array height value frequency as templates**  
428 **grow on Ni substrate.**

429 The three-dimensional lattice coordination of surface morphology was obtained by white light  
430 interferometry measurements. The statistics logic is based on finding the point which is lower than the 8  
431 points surrounded and defined as “peak”. Moreover, an extra restriction that the distances of two peaks  
432 should larger than 100 nm was added for the resolution limitation of the characterization. The peak  
433 searching and counting were completed by Python based on the following code:

```
434 import pandas as pd
435 import numpy as np
436
437 data = pd.read_csv('data.txt', sep=' ', )
438 x_size = data['x'].max()+1
439 y_size = data['y'].max()+1
440 z_np = np.zeros((x_size, y_size))
441
442 for _, row in data.iterrows():
443     if row['z'] == 'NA':
444         row['z'] = -1e10
445     z_np[int(row['x']), int(row['y'])] = row['z']
446
447 rela_z = []
448 for x in range(1, x_size-1):
449     for y in range(1, y_size-1):
450         comp = [z_np[x-1,y-1], z_np[x-1, y+1], z_np[x-1, y],
451                z_np[x+1, y-1], z_np[x+1,y+1], z_np[x+1, y],
452                z_np[x, y-1], z_np[x, y+1]]
453         if z_np[x,y] >= max(comp):
454             flag = True
455             for exis in rela_z:
456                 if (exis[0]-x)**2+(exis[1]-y)**2 <= 100:
```

```
457     flag = False
458     break
459     if flag:
460         rela_z.append([x, y, z_np[x,y], z_np[x,y]-max(comp)])
461
462 df = pd.DataFrame(rela_z, columns = ['x', 'y', 'z', 'rela_z'])
463 df.to_csv('./kevin_rela.csv')
464
```



465 **Supplementary Note 4. Discussion of bipolar membrane interfacial kinetics varied by interlayer**  
466 **structure obtained by EIS measurements and the contributions to the overall WD performances.**

467 According to the discussion in the main body, the physical size of interlayer structure can be regulated by  
468 the template morphology, thus can make influence on interfacial kinetics of bipolar membranes. Under  
469 the reverse bias operation mode, the equivalent circuit was set for describing bipolar membranes,  
470 composed of series-wound three parts reasonably as several previous reported. Here five parameters  
471 obtained from fitted results are mainly discussed here, including ohmic resistance, ionic transportation  
472 resistance, capacitance of depletion layer, depletion layer thickness, WD constant. All the EIS  
473 experiments were conducted at  $5 \text{ mA cm}^{-2}$  galvanostatic mode and the acquired kinetic parameters might  
474 only take effects at WD current density of small scale<sup>9, 16, 47</sup>.

475 Among these parameters, ohmic resistance mainly resulted by the conductivity of membrane layer and  
476 decided by chemical structure and thickness of AEL/CEL, thus received minor impact from variation of  
477 bipolar membrane interlayer structure. Ionic transportation resistance in this work was used to describe  
478 the difficulty produced  $\text{H}^+$  and  $\text{OH}^-$  transported into membrane layers. In some other reports, such  
479 resistance was directly applied for explaining the complexity of WD reaction, which we think as  
480 inaccuracy. This resistance is usually obtained at a medium frequency and defined as “charge transfer  
481 resistance” at double electrode layer if Faraday process happens, so it should be considered to link a kind  
482 of mass transfer process. WD reaction indeed can influence, for it will affect the  $\text{H}^+$  and  $\text{OH}^-$   
483 concentrations, but might not be a decisive factor of ionic transportation resistance. Capacitance of  
484 depletion layer is based on the assumption of bipolar membrane as a double electric layer capacitor, and a  
485 higher capacitance here can be ascribed to a larger active area at AEL/CEL interface of bipolar  
486 membranes. Depletion layer thickness is a parameter that derived from capacitance of depletion layer  
487 thickness, which is not independent. Depletion layer thickness is always negative correlated to the  
488 capacitance and a thinner depletion layer often foreboded a better transportation behavior of bipolar  
489 membrane interlayer; however, the above mentioned conclusions sometimes lose efficacy when the

490 interlayer structure is far from planes<sup>5</sup>, e.g., for MBM(s) in this work. WD constant is obtained from the  
 491 fitting results of Gerischer element at low frequency region of EIS. This parameter can describe the water  
 492 dissociation rate (to produce H<sup>+</sup> and OH<sup>-</sup>) at interface of bipolar membranes.

493 As shown in Supplementary Fig. 21, capacitance of depletion layer increases obviously with the lifting of  
 494 embedded interlayer area, thus, the depletion layer thickness gradually decreased. On the contrary, ionic  
 495 transportation resistance measured disadvantageously enlarged at certain current density. On the other  
 496 hand, WD constant shows an optimal value with a medium length of interfacial embedded region,  
 497 indicating that an excessive increasing of WD sites might go against the catalytic reaction.

498 Supplementary Fig. 22 shows EIS results of bipolar membranes regulated with width of embedded  
 499 structure. Different from the above situation, the variation of ionic transportation kinetics is positively  
 500 correlated, which indicates an optimal structure parameter might existed in the regulated region.  
 501 Moreover, the enhancement of WD kinetics versus width of embedded interlayer was implying the same  
 502 WD catalysts might play different roles when physically contact with AEL or CEL, and relative research  
 503 is ongoing in present.

504 To be mentioned here, EIS results can only provide one possible explanation based on the specific  
 505 equivalent circuit, and there is inevitable error occurred in fitting process; however, MBM(s) with  
 506 whatever interlayer structure parameters measured present enormous advantage over FBM on kinetics,  
 507 which we believe far beyond the error range of fitting. All fitting results of EIS measurements are  
 508 summarized in the table below:

|       | $K_d/s^{-1}$ | $R_{tr}/\Omega$ | $n$  | $Q$                   | $C/\mu F\ cm^2$       | $\delta/nm$ | $R_s/\Omega$ |
|-------|--------------|-----------------|------|-----------------------|-----------------------|-------------|--------------|
| MBM-1 | 0.50         | 2.747           | 0.96 | $2.68 \times 10^{-5}$ | $1.73 \times 10^{-5}$ | 4.10        | 3.52         |
| MBM-2 | 10.64        | 5.279           | 0.97 | $2.86 \times 10^{-5}$ | $2.13 \times 10^{-5}$ | 3.33        | 1.44         |
| MBM-3 | 1.87         | 8.267           | 0.92 | $1.27 \times 10^{-4}$ | $7.0 \times 10^{-5}$  | 1.01        | 1.65         |
| MBM-4 | 0.31         | 13.6            | 0.96 | $5.27 \times 10^{-6}$ | $3.57 \times 10^{-5}$ | 19.85       | 1.89         |

|       |       |       |      |                       |                       |       |      |
|-------|-------|-------|------|-----------------------|-----------------------|-------|------|
| MBM-5 | 29.92 | 8.107 | 0.99 | $8.12 \times 10^{-6}$ | $7.22 \times 10^{-6}$ | 9.81  | 2.04 |
| FBM   | 1.587 | 107.1 | 0.98 | $7.77 \times 10^{-7}$ | $6.54 \times 10^{-7}$ | 108.3 | 3.35 |

509 \* MBM1-5 are constructed with AEL that transferred from the templates fabricated under the conditions  
510 as followed: MBM-1: precursor concentration: 3.2 wt%  $\text{CoCl}_2 \cdot 6\text{H}_2\text{O}$  & 1.6%  $\text{NiCl}_2 \cdot 6\text{H}_2\text{O}$ ; growth duration:  
511 1.5 hours; MBM-2: precursor concentration: 0.64 wt%  $\text{CoCl}_2 \cdot 6\text{H}_2\text{O}$  & 0.32%  $\text{NiCl}_2 \cdot 6\text{H}_2\text{O}$ ; growth duration: 3  
512 hours; MBM-3: precursor concentration: 3.2 wt%  $\text{CoCl}_2 \cdot 6\text{H}_2\text{O}$  & 1.6%  $\text{NiCl}_2 \cdot 6\text{H}_2\text{O}$ ; growth duration: 3 hours;  
513 MBM-4: precursor concentration: 6.4 wt%  $\text{CoCl}_2 \cdot 6\text{H}_2\text{O}$  & 3.2%  $\text{NiCl}_2 \cdot 6\text{H}_2\text{O}$ ; growth duration: 3 hours;  
514 MBM-5: precursor concentration: 3.2 wt%  $\text{CoCl}_2 \cdot 6\text{H}_2\text{O}$  & 1.6%  $\text{NiCl}_2 \cdot 6\text{H}_2\text{O}$ ; growth duration: 4.5 hours.

515 \* Chi-square of fitted results are listed as followed: MBM-1: 0.0061; MBM-2: 0.0091; MBM-3: 0.0104;  
516 MBM-4: 0.0074; MBM-5: 0.0195; FBM: 0.0882.

517

518 I-V curves can provide evidence of WD performances determined by integrated kinetic factors. Although  
519 revealing different WD constant or ionic transportation kinetics, bipolar membranes with various  
520 interfacial length (AEL template-transferred with CoNi array of various growth duration) shows similar  
521 WD ability at any tested range (Supplementary Fig. 23, 25). On the other hand, bipolar membranes  
522 constructed with AEL template-transferred from array synthesized with to low or high precursor  
523 concentration represent inferior position of WD performances. Such property of bipolar membrane can be  
524 considered contributed synthetically by WD reactions, ionic transportations and membrane conductions.  
525 Besides, all evaluated membranes enjoys similar ionic selectivity (Supplementary Fig. 24, 1<sup>st</sup> limiting  
526 current density) for the same membrane layer they adopted.

527

528

529 **Supplementary Note 5. Design of cathodic catalyst for bipolar membrane electrosynthesis with low**  
530 **NO<sub>3</sub><sup>-</sup> and at high current density.**

531 The main goal of designing a catalyst for NO<sub>3</sub><sup>-</sup> reduction is to achieve a high yield rate with relatively low  
532 NO<sub>3</sub><sup>-</sup> substrate concentrations. Previously works have been adequately proved that cobalt elements can  
533 offer a satisficing performance, and our experimental data indicated that commercial Co<sup>0</sup> foam can realize  
534 a high faradaic efficiency and yield rate with 1M NO<sub>3</sub><sup>-</sup>. Therefore, we selected Co as the sole element to  
535 construct the cathodic catalyst for the NH<sub>3</sub> reactor.

536 The detailed fabrication processes are shown in the Supplementary Fig. 29. We firstly electrodeposited a  
537 Co framework at a high current on Co foam, during which a large amount of H<sub>2</sub> occurred and bubbling at  
538 the cathode, acting as a template for Co deposition. After the rapid process, a loose Co framework with  
539 microporous and 3D morphology was formed with the help of gas template. Then we constructed second-  
540 level of Co nanosheets on the existed framework via small current electrodeposition-reduction strategy,  
541 and a more elaborate structure can be constructed. This self-supported catalyst was noted as Co 3D  
542 nanoarray, and a small current electrodeposition was also directly conducted on a bare Co foam for  
543 comparison (note as Co nanoarray).

544 The original intention of us is to extremely enlarge the activity sites exposure growing on a multi-  
545 dimensional framework, which we believe can simultaneously enhance the intrinsic activity and mass  
546 transfer of NO<sub>3</sub><sup>-</sup> reduction (verified below). As shown in Figure 5c and Supplementary Fig. 30, the high-  
547 resolution SEM image of Co nanoarray reveals as nanosheets vertically grown on the substrate, while low  
548 magnified image showed that these sheets covered on the flat surface. On the contrary to Co nanoarray,  
549 the Co 3D framework shows a loose structure heaped up with Co sphere, and porous can be find with a  
550 diameter of several micrometers; however, finer structure can hardly be found in sub micro size. The  
551 constructed Co 3D nanoarray combine the structure of both and formed a multi-layer structure, by which  
552 means NO<sub>3</sub><sup>-</sup> can be more easily transferred through the Co framework to Co nanosheets and low  
553 concentration of reactant can be better utilized. In the end, the intrinsic activity can be promised by the

554 elaborate nanoarray, and meanwhile the mass transfer can be enhanced by the 3D structure of the  
555 framework.

556 On the other hand, the morphology of catalytic particles can tell the same story. As shown in  
557 Supplementary Fig. 31, thin nanosheets of Co can be constructed via small current electrodeposition, and  
558 the particle fell off from 3D framework shows low transparency under TEM. Constructed by multi-layer  
559 structure, the fragments from Co 3D nanoarray reveals nanoarrays inlaying at the edge of larger Co  
560 particles, whose active sites can be kindly exposed. The image of HRTEM shows clear lattice fringe for  
561 any morphology constructed, and the accordant spacing is 0.24 nm, denoting the oxide of Co (CoO).  
562 Same results can also be demonstrated by SAED pattern of synthesized catalysts. Even possessing totally  
563 different morphology, the chemical structure of each catalyst shows as the same Co metal under XRD and  
564 XPS spectrum (Supplementary Fig. 32). Note that the various valence state of Co detected by XPS can be  
565 ascribed to the minor surface-oxidation, which can hardly be detected by XRD.

566 Three-dimensional white light interference was further conducted to quantitatively describe the  
567 morphology difference between Co nanoarray and Co 3D nanoarray. As shown in Supplementary Fig. 33,  
568 the roughness of Co nanoarray was around 5 micrometers, while 3D framework offers the catalyst with a  
569 depth larger than 40 micrometers. Owing to the unique 3D structure of the catalyst, Co 3D nanoarray can  
570 represent a much higher double layer capacitance and ECSA compared to others as shown in  
571 Supplementary Fig. 34. The increase of catalytic surface area can also be verified by the N<sub>2</sub> adsorption  
572 measurements (Supplementary Fig. 35), which shows that nearly 2 times of surface area can be obtained  
573 by growing of thin nanosheets of the framework. It can be speculated that the advantage of multilayer  
574 structure of the Co 3D nanoarray is to help the NO<sub>3</sub><sup>-</sup> approach to the active sites with the enlarged spatial  
575 geometry configuration, and NH<sub>3</sub> synthesis can be proceeded at a high current and lower concentrations.

576 I-V curves of all Co- based catalysts were detected with 1M KOH alkaline electrolytes with and without  
577 (HER) NO<sub>3</sub><sup>-</sup> from 2000 ppm to 0.1 M, which is a simulation of industrial effluents. As shown in  
578 Supplementary Fig. 36, all the catalyst reveals an obviously higher NO<sub>3</sub><sup>-</sup> reduction activity compared to

579 HER with either electrolyte. Among them, most catalyst reveals a higher electrolytic current at the same  
 580 potential with higher substrate (0.1 M  $\text{KNO}_3^-$ ), including Co foam & Co Nanoarray & Co 3D framework,  
 581 but only Co 3D nanoarray with multilayer design shows a similar performance from 2000 ppm to 0.1 M.  
 582 This phenomenon confirmed the former speculation that Co 3D nanoarray can intensify the  $\text{NO}_3^-$  transfer  
 583 process with more reactive sites to achieve a better utilization of reactant in lower concentration, in which  
 584 situation concentration is less significant as a driving force. The EIS measurements showed that the  $\text{NO}_3^-$   
 585 activity of all Co catalysts far surpassed HER activity in no matter what  $\text{NO}_3^-$  concentrations adopted via  
 586 the smaller  $R_{ct}$ , and ohmic resistances are similar to each other for the same metal used. By comparing the  
 587 I-V curves of four catalysts referred, we can find that commercial Co foam can only offered the smallest  
 588 electrolytic current at the same potential with 2000 ppm or 0.1 M  $\text{NO}_3^-$ , and Co 3D nanoarray act as the  
 589 best one (Supplementary Fig. 37). Interestingly, the Tafel plots of shows that intrinsic reduction activity  
 590 of each catalyst is close, mainly accounting for the same element Co and similar vale valence state they  
 591 possess. In detail, the nanoarray of Co revealed small advantage compared to the ones flat or with  
 592 spherical morphology, which is supposed contributed by the edges of layered structure.

593 On the consideration of selectivity, a major reaction can happen at cathode as mentioned in main text (8):

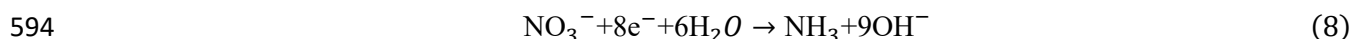

595 Which is accompanied with several possible side reactions (9-10):

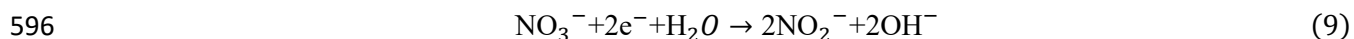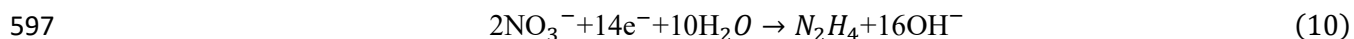

598 The colorimetric method was adopted for determine the selectivity of all catalysts, and the calibration  
 599 lines for main product  $\text{NH}_3$  and side products  $\text{NO}_2^-$  and  $\text{N}_2\text{H}_4$  were presented in Supplementary Fig. 38-41.  
 600 As discussed above, the main goal of us is to select a Co catalyst with high efficiency and yield rate with  
 601 low concentration of  $\text{NO}_3^-$ . As shown in Supplementary Fig. 42, Commercial Co foam can only achieve a  
 602 maximum  $\text{NH}_3$  FE of 76.4 % and corresponding yield of  $15.4 \text{ mg cm}^{-2} \text{ h}^{-1}$  with 2000 ppm of  $\text{NO}_3^-$ , and the

603 yield of  $\text{NH}_3$  can be nearly doubled with a higher concentration of  $\text{NO}_3^-$  adopted to help the transfer  
604 process. By induced Co nanoarray, the performance under low concentration situation was effectively  
605 promoted, achieving  $43.1 \text{ mg cm}^{-2} \text{ h}^{-1}$  of maximum  $\text{NH}_3$  yield rate with 2000 ppm  $\text{NO}_3^-$ . However, the  
606 similar high FE can hardly be reproduced by bare Co framework, might accounting for the lack of  
607 nanosheets structure. By combining the layered structure in a higher exposed surface way, Co 3D  
608 nanoarray can realize a similar FE with a high electrolytic current, so an outstanding yield of  $90.0 \text{ mg cm}^{-2}$   
609  $\text{h}^{-1}$  can be approached with 2000 ppm  $\text{NO}_3^-$  substrate. The comparison of FE and yield rate can prove  
610 that intrinsic activity and mass transfer offered a synergistic effect to achieve a better performance of  
611  $\text{NO}_3^-$  reduction to  $\text{NH}_3$ . On the other side, the side product  $\text{NO}_2^-$  was measured lower than 2% for Co 3D  
612 nanoarray catalysts at relatively lower potentials, and  $\text{N}_2\text{H}_4$  can be proved negligible (Supplementary Fig.  
613 43), which is ignored in the following experiments.

614 As a comprehensive consideration, the designed Co 3D nanoarray is qualified as the cathode catalyst for  
615 the bipolar membrane  $\text{NH}_3$  electrolysis working with high electrolytic current and low  $\text{NO}_3^-$  concentration.

616

617 **Supplementary Note 6. Techno-economic analysis of bipolar membrane fabrication and MBM NH<sub>3</sub>**  
618 **electrosynthesis process**

619 i) The calculation of MBM fabrication cost and comparison with commercial bipolar membranes.

620 **Table R1.** Chemical prices referred in the bipolar membrane fabrication process. The prices of product  
621 can be searched on <https://www.alibaba.com>.

| Name of chemicals                    | Price (P, \$ kg <sup>-1</sup> ) |
|--------------------------------------|---------------------------------|
| p-Terphenyl                          | 219.7                           |
| 1-Methyl-4-piperidone                | 77.0                            |
| Trifluoromethanesulfonic acid        | 68.6                            |
| Trifluoroacetic acid                 | 29.9                            |
| Iodomethane                          | 156.7                           |
| CoCl <sub>2</sub> ·6H <sub>2</sub> O | 23.3                            |
| NiCl <sub>2</sub> ·6H <sub>2</sub> O | 29.6                            |
| Ni plate                             | 84.3                            |
| PFSA solution                        | 195.5                           |
| Dichloromethane, Urea, etc.          | 18.0                            |
| Total                                | 517.5                           |

622

623 The cost of chemicals and consumable items for producing MBM can be calculated:

624 
$$COST_{MBM} = \sum Usage\ amount \times P = \$517.5\ m^{-2}$$

625 According to the data from DONGYUECHEM Co., the total utilities payment takes up 10-15% of  
626 consumable items. Here we set 15% as an example:

627 
$$Total\ COST_{MBM} = 150\% \times COST_{MBM} = \$595.1\ m^{-2}$$



628

629 **Table R2.** The costs comparison of MBM and other commercial bipolar membranes. The data can be  
630 obtained from fuelcellstore.com or <https://www.alibaba.com>.

| Name                        | MBM   | Fumasep<br>FBM | TRJBM  | Xion-BPM* | Neosepta<br>BP1 |
|-----------------------------|-------|----------------|--------|-----------|-----------------|
| Price (\$ m <sup>-2</sup> ) | 595.1 | 4733.3         | 2182.8 | 49671.1   | 1350            |

631 \*Only small size is available. The data was calculated from the price of small size membrane

632 As shown in the Table 2, the cost of MBM represent advantage compared to several commercial bipolar  
633 membranes. To be mentioned here, the price of chemical and consumable items taken for calculation here  
634 is grabbed as lab-scale price, and might be further decreased in industrial production. Moreover, the  
635 PFSA cation exchange layer could also be reconsidered and replaced by other cationic materials with  
636 similar function and much lower price, which can obviously squeeze the overall producing cost in further  
637 applications.

638 ii) The techno-economic analysis of bipolar membrane NH<sub>3</sub> electrosynthesis process.

639 The analysis of techno-economic analysis for NH<sub>3</sub> electrosynthesis is based on the operation of 1 A cm<sup>-2</sup>  
640 and NH<sub>3</sub> FE of 90%. Assuming the flow rate in the electrolysis system as 0.1 mL/min in single pass mode,  
641 the daily production was assumed to be 100 ton/day. According to this condition, total current was  
642 calculated to be 58.4 MA, and the total area was 5839 m<sup>2</sup> with a total power usage of 174 MW. Based on  
643 these parameters, several levelized costs were shown in Table R3.

644 **Table R3.** Levelized cost for techno-economic analysis

| Name of parameter         | Value                 |
|---------------------------|-----------------------|
| Per area cost*            | \$3576/m <sup>2</sup> |
| Total cost of flow system | \$20.8 million        |

|                      |                |
|----------------------|----------------|
| BoP cost**           | \$11.2 million |
| Electricity cost***  | \$125280/day   |
| Maintenance cost**** | \$3728/day     |

645 \* Per area cost of the stack is estimated for 1 A/cm<sup>2</sup> operation condition. Assuming the instillation factor  
646 is 1.2.

647 \*\* From the DOE analysis, the balance of plant capital cost is 35% of the total cost.

648 \*\*\* The price of electricity was assumed as \$0.03 /kWh.

649 \*\*\*\* The maintenance cost is assumed as 2.5% of capital cost per year.

650 Assuming the price of product is \$1536 /ton, the yearly profit is given as followed:

651 *yearly profit*

652 *= the yearly income of products – yearly electricity cost – yerly maintenance cost*

653 *= \$8.9 million /year*

654 Assuming an ideal situation for the stack to be maintained, the NH<sub>3</sub> stack is designed for a 5-year of  
655 working. The NPV is roughly estimated using the yearly profit value as cash flows per year, and the  
656 nominal interest rate is 5%. According to the NPV calculation equation:

657 
$$NPV = \sum_{n=1}^5 \$8.9 \text{ million} \times \left(\frac{1}{1.05^n}\right) - \$20.8 \text{ million} - \$11.2 \text{ million} = \$15.43 \text{ million}$$

658 The NPV of bipolar membrane electrosynthesis could be determined by the project life span, which was  
659 revealed as followed:

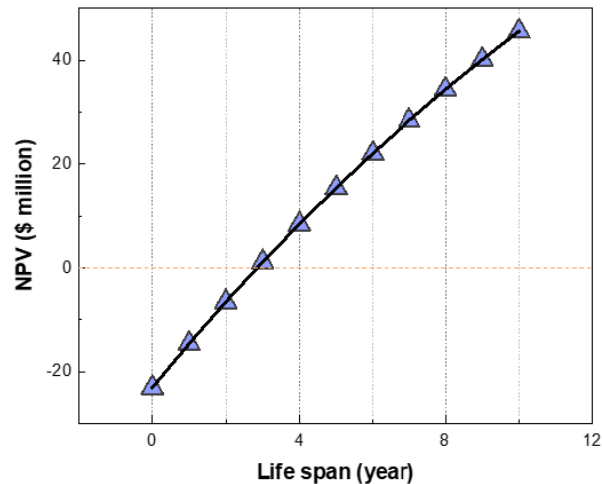

660

661 **Figure R5.** The relationship between calculated NPV and bipolar membrane NH<sub>3</sub> electrosynthesis device  
662 life span.

663

664 In conclusion, NPV becomes positive when the end-of-life span is around 4 years, which demonstrates  
665 this project is a profitable investment. To be mentioned here, most parameters referred here is obtained  
666 from lab-scale data, and the cost can definitely be further reduced for industrial-level application.

667 Furthermore, the nitrate reduction is also an eco-friendly technology by solving contamination problem  
668 with renewable electricity, which can probably acquire preferential policy in the future. The new  
669 technology also brings huge environmental benefits.

670

671

#### 672 IV. Supplementary References

- 673 1. Eswaraswamy B, Suhag A, Goel P, Mandal P, Chattopadhyay S. Potential of  
674 montmorillonite nanoclay as water dissociation catalyst at the interface of bipolar  
675 membrane. *Separation and Purification Technology* **295**, 121257 (2022).  
676
- 677 2. Ge Z, *et al.* High-performance bipolar membrane for electrochemical water electrolysis.  
678 *Journal of Membrane Science* **656**, 120660 (2022).  
679
- 680 3. Eswaraswamy B, Goel P, Mandal P, Chandra A, Chattopadhyay S. Nanocomposite  
681 interface coupled with thickness optimization promoting water dissociation in  
682 heterogeneous bipolar membrane. *Polymers for Advanced Technologies* **33**, 353-367  
683 (2022).  
684
- 685 4. Al-Dhubhani E, *et al.* Entanglement-Enhanced Water Dissociation in Bipolar Membranes  
686 with 3D Electrospun Junction and Polymeric Catalyst. *ACS Applied Energy Materials* **4**,  
687 3724-3736 (2021).  
688
- 689 5. Shehzad MA, *et al.* Shielded goethite catalyst that enables fast water dissociation in  
690 bipolar membranes. *Nature Communications* **12**, 9 (2021).  
691
- 692 6. Eswaraswamy B, Mandal P, Goel P, Chattopadhyay S. Potential of Dipicolinic Acid as a  
693 Water-Dissociating Catalyst in a Bipolar Membrane. *ACS Applied Polymer Materials* **3**,  
694 6218-6229 (2021).  
695
- 696 7. Li G, *et al.* In-situ grown polyaniline catalytic interfacial layer improves water  
697 dissociation in bipolar membranes. *Separation and Purification Technology* **275**, 119167  
698 (2021).  
699
- 700 8. Yan Z, Hitt JL, Zeng Z, Hickner MA, Mallouk TE. Improving the efficiency of CO<sub>2</sub>  
701 electrolysis by using a bipolar membrane with a weak-acid cation exchange layer. *Nature*  
702 *Chemistry* **13**, 33-40 (2021).  
703
- 704 9. Kim BS, *et al.* Bipolar Membranes to Promote Formation of Tight Ice-Like Water for  
705 Efficient and Sustainable Water Splitting. *Small* **16**, 2002641 (2020).  
706
- 707 10. Ge Z, *et al.* Beneficial Use of a Coordination Complex As the Junction Catalyst in a  
708 Bipolar Membrane. *ACS Applied Energy Materials* **3**, 5765-5773 (2020).  
709
- 710 11. Chen Y, *et al.* High-Performance Bipolar Membrane Development for Improved Water  
711 Dissociation. *ACS Applied Polymer Materials* **2**, 4559-4569 (2020).  
712
- 713 12. Cheng G, Zhao Y, Li W, Zhang J, Wang X, Dong C. Performance enhancement of  
714 bipolar membranes modified by Fe complex catalyst. *Journal of Membrane Science* **589**,  
715 117243 (2019).

- 716  
717 13. Hohenadel A, Powers D, Wycisk R, Adamski M, Pintauro P, Holdcroft S.  
718 Electrochemical Characterization of Hydrocarbon Bipolar Membranes with Varying  
719 Junction Morphology. *ACS Applied Energy Materials* **2**, 6817-6824 (2019).  
720
- 721 14. Li J, *et al.* Exfoliated MoS<sub>2</sub> nanosheets loaded on bipolar exchange membranes  
722 interfaces as advanced catalysts for water dissociation. *Separation and Purification*  
723 *Technology* **194**, 416-424 (2018).  
724
- 725 15. Manohar M, Das AK, Shahi VK. Efficient Bipolar Membrane with Functionalized  
726 Graphene Oxide Interfacial Layer for Water Splitting and Converting Salt into Acid/Base  
727 by Electrodialysis. *Industrial & Engineering Chemistry Research* **57**, 1129-1136 (2018).  
728
- 729 16. Yan Z, *et al.* The balance of electric field and interfacial catalysis in promoting water  
730 dissociation in bipolar membranes. *Energy & Environmental Science* **11**, 2235-2245  
731 (2018).  
732
- 733 17. McDonald MB, Freund MS, Hammond PT. Catalytic, Conductive Bipolar Membrane  
734 Interfaces through Layer-by-Layer Deposition for the Design of Membrane-Integrated  
735 Artificial Photosynthesis Systems. *ChemSusChem* **10**, 4599-4609 (2017).  
736
- 737 18. Wang Q, Wu B, Jiang C, Wang Y, Xu T. Improving the water dissociation efficiency in a  
738 bipolar membrane with amino-functionalized MIL-101. *Journal of Membrane Science*  
739 **524**, 370-376 (2017).  
740
- 741 19. Shen C, Wycisk R, Pintauro PN. High performance electrospun bipolar membrane with a  
742 3D junction. *Energy & Environmental Science* **10**, 1435-1442 (2017).  
743
- 744 20. Manohar M, Shukla G, Pandey RP, Shahi VK. Efficient bipolar membrane with protein  
745 interfacial layer for optimal water splitting. *Journal of Industrial and Engineering*  
746 *Chemistry* **47**, 141-149 (2017).  
747
- 748 21. Chen G-F, *et al.* Electrochemical reduction of nitrate to ammonia via direct eight-electron  
749 transfer using a copper–molecular solid catalyst. *Nature Energy* **5**, 605-613 (2020).  
750
- 751 22. Wang Y, Zhou W, Jia R, Yu Y, Zhang B. Unveiling the Activity Origin of a Copper-  
752 based Electrocatalyst for Selective Nitrate Reduction to Ammonia. *Angewandte Chemie*  
753 *International Edition* **59**, 5350-5354 (2020).  
754
- 755 23. Wu Z-Y, *et al.* Electrochemical ammonia synthesis via nitrate reduction on Fe single  
756 atom catalyst. *Nature Communications* **12**, 2870 (2021).  
757
- 758 24. Lim J, *et al.* Structure Sensitivity of Pd Facets for Enhanced Electrochemical Nitrate  
759 Reduction to Ammonia. *ACS Catalysis* **11**, 7568-7577 (2021).  
760

- 761 25. Li P, Jin Z, Fang Z, Yu G. A single-site iron catalyst with preoccupied active centers that  
762 achieves selective ammonia electrosynthesis from nitrate. *Energy & Environmental*  
763 *Science* **14**, 3522-3531 (2021).  
764
- 765 26. Jia R, Wang Y, Wang C, Ling Y, Yu Y, Zhang B. Boosting Selective Nitrate  
766 Electroreduction to Ammonium by Constructing Oxygen Vacancies in TiO<sub>2</sub>. *ACS*  
767 *Catalysis* **10**, 3533-3540 (2020).  
768
- 769 27. McEnaney JM, *et al.* Electrolyte Engineering for Efficient Electrochemical Nitrate  
770 Reduction to Ammonia on a Titanium Electrode. *ACS Sustainable Chemistry &*  
771 *Engineering* **8**, 2672-2681 (2020).  
772
- 773 28. Li J, *et al.* Efficient Ammonia Electrosynthesis from Nitrate on Strained Ruthenium  
774 Nanoclusters. *Journal of the American Chemical Society* **142**, 7036-7046 (2020).  
775
- 776 29. Wang Y, *et al.* Enhanced Nitrate-to-Ammonia Activity on Copper–Nickel Alloys via  
777 Tuning of Intermediate Adsorption. *Journal of the American Chemical Society* **142**,  
778 5702-5708 (2020).  
779
- 780 30. Fan X, *et al.* In situ grown Fe<sub>3</sub>O<sub>4</sub> particle on stainless steel: A highly efficient  
781 electrocatalyst for nitrate reduction to ammonia. *Nano Research* **15**, 3050-3055 (2022).  
782
- 783 31. Chen Q, *et al.* CoO nanoparticle decorated N-doped carbon nanotubes: a high-efficiency  
784 catalyst for nitrate reduction to ammonia. *Chemical Communications* **58**, 5901-5904  
785 (2022).  
786
- 787 32. Crawford J, Yin H, Du A, O'Mullane AP. Nitrate - to - Ammonia Conversion at an  
788 InSn - Enriched Liquid - Metal Electrode. *Angewandte Chemie*, e202201604 (2022).  
789
- 790 33. Jeon TH, Wu Z-Y, Chen F-Y, Choi W, Alvarez PJJ, Wang H. Cobalt–Copper  
791 Nanoparticles on Three-Dimensional Substrate for Efficient Ammonia Synthesis via  
792 Electrocatalytic Nitrate Reduction. *The Journal of Physical Chemistry C* **126**, 6982-6989  
793 (2022).  
794
- 795 34. Zhao Y, Liu Y, Zhang Z, Mo Z, Wang C, Gao S. Flower-like open-structured  
796 polycrystalline copper with synergistic multi-crystal plane for efficient electrocatalytic  
797 reduction of nitrate to ammonia. *Nano Energy* **97**, 107124 (2022).  
798
- 799 35. Deng X, Yang Y, Wang L, Fu X-Z, Luo J-L. Metallic Co Nanoarray Catalyzes Selective  
800 NH<sub>3</sub> Production from Electrochemical Nitrate Reduction at Current Densities Exceeding  
801 2 A cm<sup>-2</sup>. *Advanced Science* **8**, 2004523 (2021).  
802
- 803 36. Chen F-Y, *et al.* Efficient conversion of low-concentration nitrate sources into ammonia  
804 on a Ru-dispersed Cu nanowire electrocatalyst. *Nature Nanotechnology* **17**, 759-767  
805 (2022).  
806

- 807 37. Fang Z, Jin Z, Tang S, Li P, Wu P, Yu G. Porous Two-dimensional Iron-Cyano  
808 Nanosheets for High-rate Electrochemical Nitrate Reduction. *ACS Nano* **16**, 1072-1081  
809 (2022).  
810
- 811 38. Liu Z, Wang C, Chen C, Li C, Guo C. Selective electroreduction of nitrate to ammonia  
812 with high Faradaic efficiency on nanocrystalline silver. *Electrochemistry*  
813 *Communications* **131**, 107121 (2021).  
814
- 815 39. Liu C-Y, Sung C-C. A review of the performance and analysis of proton exchange  
816 membrane fuel cell membrane electrode assemblies. *Journal of Power Sources* **220**, 348-  
817 353 (2012).  
818
- 819 40. Ge L, *et al.* Electrochemical CO<sub>2</sub> reduction in membrane-electrode assemblies. *Chem* **8**,  
820 663-692 (2022).  
821
- 822 41. Sokalski T, Lewenstam A. Application of Nernst–Planck and Poisson equations for  
823 interpretation of liquid-junction and membrane potentials in real-time and space domains.  
824 *Electrochemistry Communications* **3**, 107-112 (2001).  
825
- 826 42. Sokalski T, Lingenfelter P, Lewenstam A. Numerical Solution of the Coupled  
827 Nernst–Planck and Poisson Equations for Liquid Junction and Ion Selective Membrane  
828 Potentials. *The Journal of Physical Chemistry B* **107**, 2443-2452 (2003).  
829
- 830 43. Onsager L. Deviations from Ohm's Law in Weak Electrolytes. *The Journal of Chemical*  
831 *Physics* **2**, 599-615 (1934).  
832
- 833 44. Tuckerman ME, Marx D, Parrinello M. The nature and transport mechanism of hydrated  
834 hydroxide ions in aqueous solution. *Nature* **417**, 925-929 (2002).  
835
- 836 45. Golubenko DV, Yaroslavtsev AB. Effect of current density, concentration of ternary  
837 electrolyte and type of cations on the monovalent ion selectivity of surface-sulfonated  
838 graft anion-exchange membranes: modelling and experiment. *Journal of Membrane*  
839 *Science* **635**, 119466 (2021).  
840
- 841 46. Hohenadel A, Gangrade AS, Holdcroft S. Spectroelectrochemical Detection of Water  
842 Dissociation in Bipolar Membranes. *ACS Applied Materials & Interfaces* **13**, 46125-  
843 46133 (2021).  
844
- 845 47. Blommaert MA, Vermaas DA, Izelaar B, in 't Veen B, Smith WA. Electrochemical  
846 impedance spectroscopy as a performance indicator of water dissociation in bipolar  
847 membranes. *Journal of Materials Chemistry A* **7**, 19060-19069 (2019).  
848

849
