# Supplementary material for: Continuous ammonia electrosynthesis using physically interlocked bipolar membrane at 1000 mA cm−2
Source: PubMed Central journal article supplement (PMC10036611; doi:10.1038/s41467-023-37273-7), 2023-03-23
Supplement: 41467_2023_37273_MOESM3_ESM.pdf [file 41467_2023_37273_MOESM3_ESM.pdf]

## **Description of Additional Supplementary Files**

**Supplementary Video 1.** 3D reconstruction of MBM.

**Supplementary Video 2.** 3D reconstruction of flat interface BM
